# Supplementary material for: Synthesis of allyl-aziridines from α-halo oxime ethers and allyl zinc bromides
Source: Royal Society of Chemistry journal article supplement (doi:10.1039/c5ra26394h), 2016-01-01

# Synthesis of allyl-aziridines from $\alpha$ -Halo Oxime Ethers and Allyl zinc bromides

Songlin Zheng and Songlin Zhang\*

Key Laboratory of Organic Synthesis of Jiangsu Province, College of Chemistry, Chemical Engineering and Materials Science, Dushu Lake Campus, Soochow University, Suzhou 215123, People's Republic of China

## Supporting information

|                                                                             |    |
|-----------------------------------------------------------------------------|----|
| General details.....                                                        | 1  |
| General procedure for Synthesis of $\alpha$ -halo oxime ethers (1a-1o)..... | 2  |
| General procedure for Synthesis of Aziridines:.....                         | 4  |
| References:.....                                                            | 10 |
| $^1\text{H}$ and $^{13}\text{C}$ of all compounds.....                      | 11 |

### General details

Zinc powder must be activated and all other chemicals were purchased from a commercial source without further purification before use. Solvents were purchased from commercial source, without further purification before use. Petroleum ether (PE) used refers to the 60-90°C boiling point fraction of petroleum. Tetrahydrofuran (THF) was distilled from sodium and benzophenone immediately prior to use. The flash column chromatography was carried out on silica gel (300-400 mesh).  $^1\text{H}$  and  $^{13}\text{C}$  NMR spectra were recorded in  $\text{CDCl}_3$  on a 400 MHz spectrometer. Chemical shifts in  $^1\text{H}$  NMR spectra are reported in parts per million (ppm,  $\delta$ ) downfield from the internal standard  $\text{Me}_4\text{Si}$  (TMS,  $\delta = 0.00\text{ppm}$ ). Chemical shifts in  $^{13}\text{C}$  NMR spectra are reported relative to the central line of the chloroform signal ( $\delta = 77.0\text{ppm}$ ). IR spectra were recorded on F-1000 spectrometer in KBr with absorptions in  $\text{cm}^{-1}$ . HRMS were obtained with a TOF-Q III instrument.

## General procedure for Synthesis of $\alpha$ -halo oxime ethers (1a-1o).<sup>1</sup>

The appropriate  $\alpha$ -haloketone (10.0mmol) and O-methyl (or Benzyl) hydroxylamine hydrochloride (15.0 mmol) were dissolved in ethanol (30 mL) containing one drop of concentrated sulphuric acid. The mixture was stirred at room temperature for 2-12 h. The reaction progress was monitored by TLC. When the starting material disappeared, the solvent was evaporated in vacuum to near dryness. Ether (50 mL) was added and the solution was washed with 1 M aqueous KHSO<sub>4</sub> (2 × 20 ml), saturated aqueous NaHCO<sub>3</sub> (20 ml) and water (20 ml). The organic phase was dried over Na<sub>2</sub>SO<sub>4</sub>, filtered and the solvent evaporated in vacuum. The residue was purified by column chromatography (PE/dichloromethane) through deactivated silica gel. Finally, solvents were removed in vacuum affording the corresponding  $\alpha$ - halo oxime ethers.

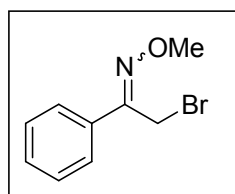

Yield 89 %; colorless liquid; The *Z/E* ratio was 70:30. <sup>1</sup>H NMR (400 MHz, CDCl<sub>3</sub>, TMS)  $\delta$  7.71 - 7.68 (m, 2H), 7.39 - 7.37 (m, 3H), 4.51 & 4.33 (s, 2H), 4.07 & 4.05 (s, 3H) ppm ; <sup>13</sup>C NMR (100 MHz, CDCl<sub>3</sub>)  $\delta$  152.54, 152.47, 133.36, 133.32, 129.62, 129.60, 128.59, 128.27, 126.06, 125.95, 62.72, 62.65, 32.46, 17.94 ppm

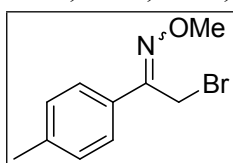

### (*Z/E*)-2-bromo-1-(p-tolyl) ethanone O-methyl oxime (1b)

Yield 83 %; colorless liquid; The *Z/E* ratio was 38:62. <sup>1</sup>H NMR (400 MHz, CDCl<sub>3</sub>, TMS)  $\delta$  7.59 - 7.57 (d, 2H, *J* = 8 Hz), 7.19 - 7.17 (d, 2H, *J* = 8 Hz), 4.50 & 4.31 (s, 2H), 4.06 & 4.04 (s, 3H), 2.35(s, 3 H) ppm ; <sup>13</sup>C NMR (100 MHz, CDCl<sub>3</sub>)  $\delta$  152.48, 152.41, 139.72, 139.69, 130.45, 130.42, 129.28, 129.26, 125.93, 125.82, 62.60, 62.52, 32.42, 21.24, 17.97 ppm

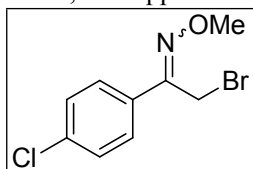

### (*Z/E*)-2-bromo-1-(4-chlorophenyl)ethanone O-methyl oxime (1c)

Yield 80 %; white solid; The *Z/E* ratio was 29:71. <sup>1</sup>H NMR (400 MHz, CDCl<sub>3</sub>, TMS)  $\delta$  7.64 - 7.61 (m, 2H), 7.37 - 7.34 (m, 2H), 4.49 & 4.30 (s, 2H), 4.07 & 4.06 (s, 3H) ppm ; <sup>13</sup>C NMR (100 MHz, CDCl<sub>3</sub>)  $\delta$  151.46, 151.39, 135.62, 135.60, 131.77, 131.73, 128.79, 128.77, 127.34, 127.22 ppm

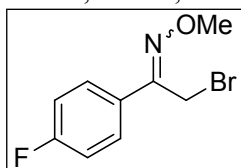

### (*Z/E*)-2-bromo-1-(4-fluorophenyl)ethanone O-methyl oxime (1d)

Yield 77 %; white solid; The *Z/E* ratio was 24:76. <sup>1</sup>H NMR (400 MHz, CDCl<sub>3</sub>, TMS)  $\delta$  7.71 - 7.67 (m, 2H), 7.11 - 7.05 (m, 2H), 4.51 & 4.32 (s, 2H), 4.07 & 4.06 (s, 3H) ppm ; <sup>13</sup>C NMR (100 MHz, CDCl<sub>3</sub>)  $\delta$  164.78, 164.76, 162.30, 162.27, 151.49, 151.41, 129.48, 129.44, 129.40, 128.01, 127.93, 127.89, 127.81, 115.68, 115.66, 115.46, 115.44, 62.69, 62.61, 32.28, 17.72 ppm

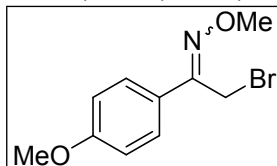

### (*Z/E*)-2-bromo-1-(4-methoxyphenyl)ethanone O-methyl oxime (1e)

Yield 82 %; white solid; The *Z/E* ratio was 60:40. <sup>1</sup>H NMR (400 MHz, CDCl<sub>3</sub>, TMS)  $\delta$  7.64 - 7.61 (m, 2H), 6.90 - 6.86 (m, 2H), 4.48 & 4.30 (s, 2H), 4.04 & 4.02 (s, 3H), 3.78 (s, 3H) ppm ; <sup>13</sup>C NMR (100 MHz, CDCl<sub>3</sub>)  $\delta$  160.68, 160.65, 152.05, 151.96, 127.39, 127.27, 125.67, 125.65, 113.90, 113.88, 62.45, 62.38, 55.14, 32.32, 17.91 ppm

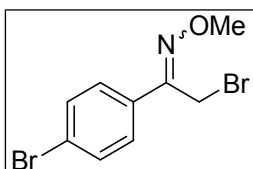

### (*Z/E*)-2-bromo-1-(4-bromophenyl)ethanone O-methyl oxime (1f)

Yield 88 %; white solid; The *Z/E* ratio was 46:54. <sup>1</sup>H NMR (400 MHz, CDCl<sub>3</sub>, TMS) δ 7.57 - 7.55 (m, 2H), 7.51 - 7.49 (m, 2H), 4.48 & 4.29 (s, 2H), 4.07 & 4.05 (s, 3H) ppm ; <sup>13</sup>C NMR (100 MHz, CDCl<sub>3</sub>) δ 151.50, 151.43, 132.19, 132.15, 131.72, 131.70, 127.56, 127.44, 123.93, 123.92, 62.87, 62.79, 32.08, 17.47 ppm

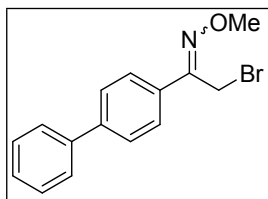

**(Z/E)-1-([1,1'-biphenyl]-4-yl)-2-bromoethanone O-methyl oxime (1g)**

Yield 71 %; white solid; The *Z/E* ratio was 35:65. <sup>1</sup>H NMR (400 MHz, CDCl<sub>3</sub>, TMS) δ 7.76 - 7.74 (d, 2H, *J*=8Hz), 7.57 (t, 4H, *J*= 8Hz), 7.40 (t, 2H, *J*= 8Hz), 7.32 (t, 1H, *J*= 8Hz), 4.51 & 4.32 (s, 2H), 4.06 & 4.05 (s, 3H) ppm; <sup>13</sup>C NMR (100 MHz, CDCl<sub>3</sub>) δ 152.14, 152.07, 142.25,

142.23, 140.13, 132.11, 132.09, 128.77, 127.60, 127.16, 126.93, 126.43, 126.31, 62.73, 62.65, 32.28, 17.79 ppm

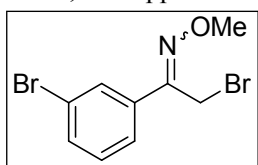

**(Z/E)-2-bromo-1-(3-bromophenyl)ethanone O-methyl oxime (1h)**

Yield 80 %; colorless liquid; The *Z/E* ratio was 46:54. <sup>1</sup>H NMR (400 MHz, CDCl<sub>3</sub>, TMS) δ 7.87 - 7.86 (m, 1H), 7.59 - 7.57 (m, 1H), 7.50 - 7.47 (m, 1H), 7.22 (t, 1H, *J*= 8Hz), 4.46 & 4.27 (s, 2H), 4.07 & 4.05 (s, 3H) ppm; <sup>13</sup>C NMR (100 MHz, CDCl<sub>3</sub>) δ 151.06, 150.99, 135.25, 135.21, 132.42, 132.40, 129.99, 129.97, 128.91, 128.81, 124.56, 124.43, 122.71, 122.69, 62.90, 62.82, 32.06, 17.44 ppm

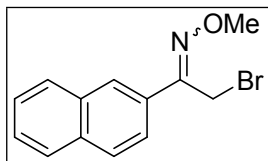

**(Z/E)-2-bromo-1-(naphthalen-2-yl)ethanone O-methyl oxime (1i)**

Yield 85 %; white solid; The *Z/E* ratio was 62:38. <sup>1</sup>H NMR (400 MHz, CDCl<sub>3</sub>, TMS) δ 8.07 (s, 1H), 7.92 - 7.85 (m, 2H), 7.82 - 7.80 (m, 2H), 7.50 - 7.46 (m, 2H), 4.62 & 4.44 (s, 2H), 4.12 & 4.11 (s, 3H) ppm ; <sup>13</sup>C NMR (100 MHz, CDCl<sub>3</sub>) δ 152.33, 152.25, 133.71, 133.69, 132.93, 130.52, 128.46, 128.25, 128.23, 127.54, 126.78, 126.36, 125.84, 125.67, 123.09, 123.04, 62.78, 62.70, 32.18, 17.68 ppm.

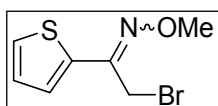

**(Z/E)-2-bromo-1-(thiophen-2-yl)ethanone O-methyl oxime (1k)**

Yield 53 %; white solid; The *Z/E* ratio was 68:32. <sup>1</sup>H NMR (400 MHz, CDCl<sub>3</sub>, TMS) δ 7.32 - 7.29 (m, 2H), 7.05 - 7.02 (m, 1H), 4.48 & 4.31 (s, 2H), 4.04 & 4.03 (s, 3H) ppm ; <sup>13</sup>C NMR (100 MHz, CDCl<sub>3</sub>) δ 149.03, 148.86, 136.95, 136.92, 127.41, 127.39, 127.19, 127.17, 126.75, 126.50, 62.81, 62.74, 32.43, 17.59 ppm.

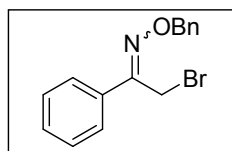

**(Z/E)-2-bromo-1-phenylethanone O-benzyl oxime (1l)**

Yield 88 %; colorless liquid; The *Z/E* ratio was 44:56. <sup>1</sup>H NMR (400 MHz, CDCl<sub>3</sub>, TMS) δ 7.71 - 7.67 (m, 2H), 7.44 - 7.28 (m, 8H), 5.32 & 5.31 (s, 2H), 4.55 & 4.37 (s, 2H) ppm ; <sup>13</sup>C NMR (100 MHz, CDCl<sub>3</sub>) δ 152.91, 152.85, 137.38, 137.33, 133.44, 133.37, 129.66, 129.64, 128.58, 128.56, 128.39, 128.38, 128.12, 128.07, 127.95, 127.93, 126.15, 126.03, 76.97, 76.91, 32.69, 18.19 ppm.

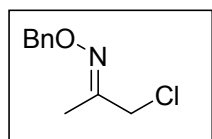

**(Z/E)-1-chloropropan-2-one O-benzyl oxime (1m).**

Yield 85 %; colorless liquid; The *Z/E* ratio was 93:7. <sup>1</sup>H NMR (400 MHz, CDCl<sub>3</sub>, TMS) δ 7.36 - 7.26 (m, 5H), 5.10 & 5.09 (s, 2H), 4.22 & 4.03 (s, 2H), 1.99 & 1.97 (s, 3H) ppm ; <sup>13</sup>C NMR (100 MHz, CDCl<sub>3</sub>) δ 153.38, 137.50,

128.31, 127.96, 127.92, 127.80, 75.99, 75.92, 45.93, 36.90, 18.13, 12.51 ppm.

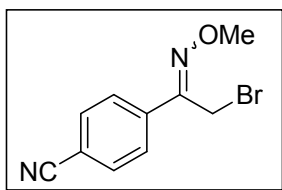

**(Z/E)- 4-(2-bromo-1-(methoxyimino)ethyl)benzotrile (1n)**

Yield 83 %; white solid; The *Z/E* ratio was 48:52. <sup>1</sup>H NMR (400 MHz, CDCl<sub>3</sub>, TMS) δ 7.85 - 7.82 (m, 2H), 7.70 - 7.67 (m, 2H), 4.53 & 4.34 (s, 2H), 4.13 & 4.11 (s, 3H) ppm ; <sup>13</sup>C NMR (100 MHz, CDCl<sub>3</sub>) δ 150.90, 150.85, 137.56, 137.52, 132.32, 132.30, 126.61, 126.48,

118.42, 113.02, 113.00, 63.28, 63.20, 31.83, 17.06 ppm

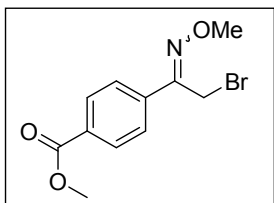

**(Z/E)- methyl 4-(2-bromo-1-(methoxyimino)ethyl)benzoate (1o)**

Yield 86 %; white solid; The *Z/E* ratio was 25:75. <sup>1</sup>H NMR (400 MHz, CDCl<sub>3</sub>, TMS) δ 8.08 - 8.04 (m, 2H), 7.80 - 7.77 (m, 2H), 4.54 & 4.36 (s, 2H), 4.12 & 4.10 (s, 3H), 3.93 (s, 3H) ppm ; <sup>13</sup>C NMR (100 MHz, CDCl<sub>3</sub>) δ 166.53, 151.73, 151.67, , 137.54, 137.50, 130.93, 130.90,

129.82, 129.79, 126.02, 125.90, 63.08, 63.00, 52.22, 32.18, 17.52 ppm.

**General procedure for Synthesis of Aziridines:**

Allyl bromide (1 mmol) and Zinc powder (1.2 mmol, 78.5mg) were suspended in dry THF (4 mL) under a N<sub>2</sub> atmosphere at RT. The mixture was stirred for about 15-30 min, and the zinc powder disappeared. Stirring was continued for one hour to complete the synthesis of the organozinc reagent; Stirring was stopped, allowed to stand for 5 minutes. The supernatant was transferred to a dry flask containing 1(0.5mmol), the mixture was stirred under a N<sub>2</sub> atmosphere at RT for 14h and then was quenched with 10mL H<sub>2</sub>O .The resulting mixture was extracted with Et<sub>2</sub>O(3×15 mL) The organic phase was dried over Na<sub>2</sub>SO<sub>4</sub>, filtered and the solvent evaporated in vacuum. The residue was purified by column chromatography (PE/EA) through deactivated silica gel. Finally, solvents were removed in vacuum affording the corresponding aziridines.

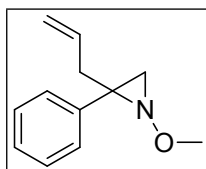

**2-allyl-1-methoxy-2-phenylaziridine (3a)**

colorless liquid; 80mg (85%); IR (KBr): 3062, 3028, 2982, 2939, 2894, 2808, 1640,1603, 1495, 1447, 996, 916, 760,698cm<sup>-1</sup>; <sup>1</sup>H NMR (400 MHz, CDCl<sub>3</sub>, TMS) δ 7.32 - 7.27 (m, 4H), 7.23 - 7.21 (m, 1H), 5.83 - 5.73 (m, 1H), 5.04 - 4.99 (m, 2H), 3.65(s, 3H), 2.86 - 2.75(m, 2H) , 2.26 - 2.25 (m, 1H), 2.095(d, 1H, *J*=4Hz) ppm ; <sup>13</sup>C NMR (100 MHz, CDCl<sub>3</sub>) δ 141.0 , 134.7 , 128.2 , 127.8 , 127.0 , 117.2 , 60.3 , 49.9 , 42.8 , 35.5 ppm ; HRMS (ESI) *m/z* (M+H<sup>+</sup>) calcd for C<sub>12</sub>H<sub>16</sub>NO 190.1226, found 190.1240.

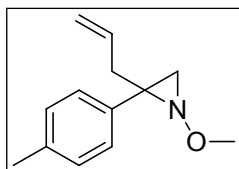

**2-allyl-1-methoxy-2-(p-tolyl)aziridine (3b)**

colorless liquid; 87mg (86%); IR (KBr):3073, 3026, 2983, 2939, 2898, 2805, 1647, 1608, 1506, 1445, 993,909, 828cm<sup>-1</sup>; <sup>1</sup>H NMR (400 MHz, CDCl<sub>3</sub>, TMS) δ 7.19 (s, 1H), 7.19 (s, 1H), 7.10 (d, 2H, *J* = 8Hz), 5.83 - 5.73 (m, 1H), 5.04 - 4.99 (m, 2H), 3.64(s, 3H), 2.84 - 2.74 (m, 2H) , 2.30(s, 3H), 2.24 - 2.23 (m, 1H), 2.065(d, 1H, *J*=4Hz) ppm ; <sup>13</sup>C NMR (100 MHz, CDCl<sub>3</sub>) δ 138.0 , 136.6 , 134.9 , 128.9 , 127.6 , 117.1 , 60.3 , 49.6 , 42.8 , 35.5, 21.0 ppm ; HRMS (ESI) *m/z* (M+H<sup>+</sup>) calcd for C<sub>13</sub>H<sub>18</sub>NO 204.1383, found 204.1380.

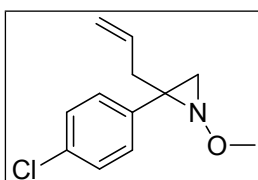

**2-allyl-2-(4-chlorophenyl)-1-methoxyaziridine (3c)**

colorless liquid; 93mg (83%); IR (KBr): 3077, 2983, 2939, 2894, 2808,

1640, 1598, 1493, 1466, 977, 918, 832 $\text{cm}^{-1}$ ;  $^1\text{H}$  NMR (400 MHz,  $\text{CDCl}_3$ , TMS)  $\delta$  7.28 - 7.23 (m, 4H), 5.80 - 5.70 (m, 1H), 5.03 - 4.98 (m, 2H), 3.64 (s, 3H), 2.85 - 2.71(m, 2H) , 2.21 - 2.20 (m, 1H), 2.095 (d, 1H,  $J=4\text{Hz}$ ) ppm ;  $^{13}\text{C}$  NMR (100 MHz,  $\text{CDCl}_3$ )  $\delta$  139.6 , 134.4 , 132.8 , 129.2 , 128.4 , 117.6 , 60.4 , 49.2 , 43.1 , 35.4 ppm ; HRMS (ESI)  $m/z$  ( $\text{M}+\text{H}^+$ ) calcd for  $\text{C}_{12}\text{H}_{15}\text{ClNO}$  224.0837, found 224.0837.

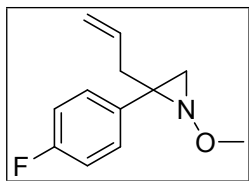

**2-allyl-2-(4-fluorophenyl)-1-methoxyaziridine (3d)**

colorless liquid; 83mg (80%); IR (KBr): 3076, 2983, 2940, 2895, 2809, 1641, 1605, 1512, 1467, 977, 919, 838 $\text{cm}^{-1}$ ;  $^1\text{H}$  NMR (400 MHz,  $\text{CDCl}_3$ , TMS)  $\delta$  7.30 - 7.26 (m, 2H), 7.00 - 6.95 (m, 2H), 5.81 - 5.71 (m, 1H), 5.02 - 4.98 (m, 2H), 3.65(s, 3H), 2.84 - 2.71(m, 2H) , 2.22 - 2.21 (m, 1H), 2.09 (d, 1H,  $J=3\text{Hz}$ ) ppm ;  $^{13}\text{C}$  NMR (100 MHz,  $\text{CDCl}_3$ )  $\delta$  161.8 ( $^1J(\text{C},\text{F})=245\text{ Hz}$ ) , 136.8 ( $^4J(\text{C},\text{F})=3\text{ Hz}$ ) , 134.5 , 129.5 ( $^3J(\text{C},\text{F})=8\text{Hz}$ ) , 117.5 , 115.1 ( $^2J(\text{C},\text{F})=21\text{ Hz}$ ) , 60.4 , 49.4 , 42.9 , 35.7 ppm ; HRMS (ESI)  $m/z$  ( $\text{M}+\text{H}^+$ ) calcd for  $\text{C}_{12}\text{H}_{15}\text{FNO}$  208.1132, found 208.1131.

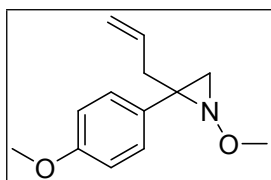

**2-allyl-1-methoxy-2-(4-methoxyphenyl)aziridine (3e)**

colorless liquid; 88mg (80%); IR (KBr): 3074, 2981, 2937, 2835, 2808, 1640, 1612, 1515, 1465, 977, 914, 833 $\text{cm}^{-1}$ ;  $^1\text{H}$  NMR (400 MHz,  $\text{CDCl}_3$ , TMS)  $\delta$  7.17 - 7.13 (m, 2H), 6.77 - 6.74 (m, 2H), 5.75 - 5.65 (m, 1H), 4.96 - 4.91 (m, 2H) , 3.69 (s, 3H), 3.57 (s, 3H), 2.74 - 2.65(m, 2H) , 2.16 - 2.15 (m, 1H), 1.98(d, 1H,  $J=3\text{Hz}$ ) ppm ;  $^{13}\text{C}$  NMR (100 MHz,  $\text{CDCl}_3$ )  $\delta$  158.5 , 134.9 , 133.1 , 128.9 , 117.1 , 113.6 , 60.3 , 55.2 , 49.4 , 42.8, 35.7 ppm ; HRMS (ESI)  $m/z$  ( $\text{M}+\text{H}^+$ ) calcd for  $\text{C}_{13}\text{H}_{18}\text{NO}_2$  220.1332, found 220.1336.

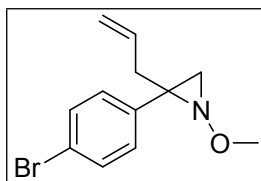

**2-allyl-2-(4-bromophenyl)-1-methoxyaziridine (3f)**

colorless liquid; 124mg (93%); IR (KBr): 3078, 2961, 2900, 2808, 1640, 1592, 1490, 1466, 996, 918, 823 $\text{cm}^{-1}$ ;  $^1\text{H}$  NMR (400 MHz,  $\text{CDCl}_3$ , TMS)  $\delta$  7.42 - 7.40 (m, 2H), 7.20 - 7.18 (m, 2H), 5.80 - 5.70 (m, 1H), 5.02 - 4.98 (m, 2H), 3.64 (s, 3H), 2.84 - 2.79 (m, 1H), 2.76 - 2.70(m, 1H), 2.20 - 2.19(m, 1H), 2.10(d, 1H,  $J=3\text{Hz}$ ) ppm;  $^{13}\text{C}$  NMR (100 MHz,  $\text{CDCl}_3$ )  $\delta$  140.1, 134.3, 131.3, 129.5, 120.9, 117.6, 60.4, 49.2, 43.0, 35.2 ppm; HRMS (ESI)  $m/z$  ( $\text{M}+\text{H}^+$ ) calcd for  $\text{C}_{12}\text{H}_{15}^{79}\text{BrNO}$  268.0337, found 268.0334;  $\text{C}_{12}\text{H}_{15}^{81}\text{BrNO}$  270.0317, found 270.0323.

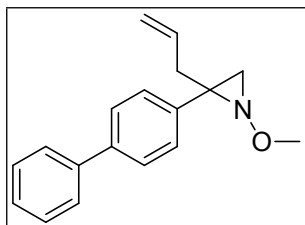

**2-([1,1'-biphenyl]-4-yl)-2-allyl-1-methoxyaziridine (3g)**

colorless liquid; 112mg (85%); IR (KBr): 3076, 3029, 2982, 2938, 2893, 2807, 1640, 1599, 1486, 1465, 995, 913, 843 $\text{cm}^{-1}$ ;  $^1\text{H}$  NMR (400 MHz,  $\text{CDCl}_3$ , TMS)  $\delta$  7.56 - 7.51 (m, 4H), 7.41 - 7.36 (m, 4H), 7.32 - 7.28 (m, 1H), 5.87 - 5.77(m, 1H), 5.07 - 5.02 (m, 2H), 3.66 (s, 3H), 2.89 - 2.78 (m, 2H), 2.28 - 2.27(m, 1H), 2.12 (d, 1H,  $J=3\text{Hz}$ ) ppm;  $^{13}\text{C}$  NMR (100 MHz,  $\text{CDCl}_3$ )  $\delta$  140.7, 140.1, 139.9, 134.7, 128.7, 128.1, 127.2, 127.0, 126.9, 117.3, 60.3, 49.4, 43.0, 35.3; HRMS (ESI)  $m/z$  ( $\text{M}+\text{H}^+$ ) calcd for  $\text{C}_{18}\text{H}_{20}\text{NO}$  266.1539, found 266.1544.

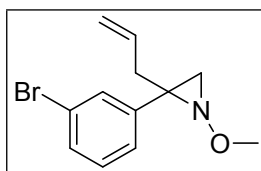

**2-allyl-2-(3-bromophenyl)-1-methoxyaziridine (3h)**

colorless liquid; 118mg (88%); IR (KBr): 3075, 2983, 2939, 2893, 2808,

1640, 1595, 1476, 1466, 978, 915, 883,790,694 $\text{cm}^{-1}$ ;  $^1\text{H}$  NMR (400 MHz,  $\text{CDCl}_3$ , TMS)  $\delta$  7.47 - 7.46 (m, 1H), 7.36 - 7.33 (m, 1H), 7.26 - 7.23 (m, 1H), 7.17 - 7.14 (m, 1H), 5.81 - 5.70 (m, 1H), 5.04 - 4.99 (m, 2H), 3.65 (s, 3H), 2.86 - 2.80(m, 1H), 2.77 - 2.71(m, 1H), 2.21 - 2.20(m, 1H), 2.095(d, 1H,  $J=4\text{Hz}$ ) ppm ;  $^{13}\text{C}$  NMR (100 MHz,  $\text{CDCl}_3$ )  $\delta$  143.4, 134.2, 130.9, 130.1, 129.7, 126.5, 122.3, 117.7, 60.4, 49.2, 43.1, 35.2 ppm ; HRMS (ESI)  $m/z$  ( $\text{M}+\text{H}^+$ ) calcd for  $\text{C}_{12}\text{H}_{15}^{79}\text{BrNO}$  268.0337, found 268.0329;  $\text{C}_{12}\text{H}_{15}^{81}\text{BrNO}$  270.0317, found 270.0310

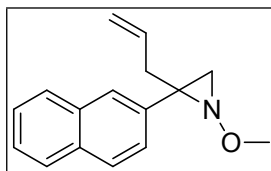

**2-allyl-1-methoxy-2-(naphthalen-2-yl) aziridine (3i)**

colorless liquid; 106mg (89%); IR (KBr): 3057, 2981, 2938, 2893, 2807, 1640, 1600, 1506, 1466, 995, 913 $\text{cm}^{-1}$ ;  $^1\text{H}$  NMR (400 MHz,  $\text{CDCl}_3$ , TMS)  $\delta$  7.79 - 7.74 (m, 4H), 7.48 - 7.41 (m, 3H), 5.86 - 5.75 (m, 1H), 5.04 - 4.97 (m, 2H), 3.70(s, 3H), 2.95 - 2.83(m, 2H), 2.35 - 2.34(m, 1H), 2.155(d, 1H,  $J=4\text{Hz}$ ) ppm ;  $^{13}\text{C}$  NMR (100 MHz,  $\text{CDCl}_3$ )  $\delta$  138.4, 134.7, 133.1, 132.5, 128.0, 127.8, 127.6, 126.7, 126.0, 125.8, 117.3, 60.4, 50.1, 43.0, 35.5 ppm ; HRMS (ESI)  $m/z$  ( $\text{M}+\text{H}^+$ ) calcd for  $\text{C}_{16}\text{H}_{18}\text{NO}$  240.1383, found 240.1385.

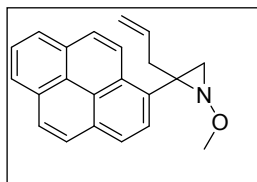

**2-allyl-1-methoxy-2-(pyren-1-yl)aziridine (3j):**

pale yellow oil; 63mg (40%); IR (KBr): 3074, 2970, 2919, 2849, 2808, 1632, 1488, 1001, 911 $\text{cm}^{-1}$ ;  $^1\text{H}$  NMR (400 MHz,  $\text{CDCl}_3$ , TMS)  $\delta$  8.43(d, 1H,  $J=4\text{Hz}$ ), 8.18 - 8.10(m, 4H), 8.03 - 7.95(m, 4H), 5.82 - 5.72 (m, 1H), 4.91 - 4.83 (m, 2H), 3.85(s, 3H), 3.11 - 2.98 (m, 2H), 2.48 - 2.42 (m, 2H), 1.34 (s, 1H), 1.28 (s, 1H) ppm;  $^{13}\text{C}$  NMR (100 MHz,  $\text{CDCl}_3$ )  $\delta$  134.7, 134.3, 131.2, 130.7, 130.6, 128.6, 127.7, 127.5, 127.4, 127.2, 125.9, 125.2, 125.1, 124.9, 124.8, 124.4, 123.5, 117.4, 60.5, 50.2, 43.2, 37.3 ppm; HRMS (ESI)  $m/z$  ( $\text{M}+\text{H}^+$ ) calcd for  $\text{C}_{22}\text{H}_{20}\text{NO}$  314.1539, found 314.1537.

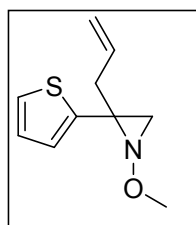

**2-allyl-1-methoxy-2-(thiophen-2-yl)aziridine (3k)**

colorless liquid; 53mg (54%); IR (KBr): 3075, 2898, 2937, 2895, 2808, 1640, 1533, 1465, 1435, 995, 918 $\text{cm}^{-1}$ ;  $^1\text{H}$  NMR (400 MHz,  $\text{CDCl}_3$ , TMS)  $\delta$  7.17 - 7.15 (m, 1H), 6.93 - 6.91 (m, 2H), 5.94 - 5.84 (m, 1H), 5.18 - 5.07 (m, 2H), 3.63 (s, 3H), 2.87 - 2.84 (m, 2H), 2.395 (d, 1H,  $J=4\text{Hz}$ ), 2.185 (d, 1H,  $J=4\text{Hz}$ ) ppm ;  $^{13}\text{C}$  NMR (100 MHz,  $\text{CDCl}_3$ )  $\delta$  146.0, 134.6, 126.7, 124.6, 124.3, 117.5, 60.5, 45.9, 45.2, 34.9 ppm ; HRMS (ESI)  $m/z$  ( $\text{M}+\text{H}^+$ ) calcd for  $\text{C}_{10}\text{H}_{14}\text{NOS}$  196.0791, found 196.0790.

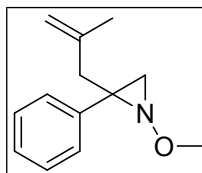

**1-methoxy-2-(2-methylallyl)-2-phenylaziridine (3l)**

colorless liquid; 77mg (76%); IR (KBr): 3062, 3028, 2982, 2939, 2894, 2808, 1648, 1495, 1447, 890, 778, 698 $\text{cm}^{-1}$ ;  $^1\text{H}$  NMR (400 MHz,  $\text{CDCl}_3$ , TMS)  $\delta$  7.31 - 7.18 (m, 5H), 4.73 (s, 1H), 4.64 (s, 1H), 3.65(s, 3H), 2.79 (m, 2H), 2.41 - 2.40 (m, 1H), 2.16 (d, 1H,  $J=3\text{Hz}$ ), 1.71 (s, 3H) ppm ;  $^{13}\text{C}$  NMR (100 MHz,  $\text{CDCl}_3$ )  $\delta$  142.2, 141.1, 128.1, 127.5, 126.9, 113.4, 60.2, 48.7, 43.2, 38.3, 23.2 ppm ; HRMS (ESI)  $m/z$  ( $\text{M}+\text{H}^+$ ) calcd for  $\text{C}_{13}\text{H}_{18}\text{NO}$  204.1383, found 204.1380.

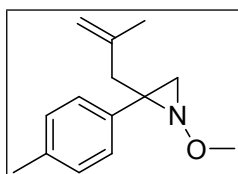

**1-methoxy-2-(2-methylallyl)-2-(p-tolyl)aziridine (3m)**

colorless liquid; 75mg (69%); IR (KBr): 3073, 3026, 2982, 2939, 2897, 2807, 1649, 1516, 1465, 889,820 $\text{cm}^{-1}$ ;  $^1\text{H}$  NMR (400 MHz,  $\text{CDCl}_3$ , TMS)

$\delta$  7.19 - 7.17 (m, 4H), 7.08 (d, 2H,  $J = 8\text{Hz}$ ), 4.73 (s, 1H), 4.65 (s, 1H), 3.63 (s, 3H), 2.78 (m, 2H), 2.40 - 2.39 (m, 1H), 2.29 (s, 3H), 2.13 (d, 1H,  $J=3\text{Hz}$ ), 1.71 (s, 3H) ppm ;  $^{13}\text{C}$  NMR (100 MHz,  $\text{CDCl}_3$ )  $\delta$  142.4, 138.1, 136.5, 128.8, 127.3, 113.3, 60.2, 48.4, 43.1, 38.3, 23.2, 21.0 ppm ; HRMS (ESI)  $m/z$  ( $\text{M}+\text{H}^+$ ) calcd for  $\text{C}_{14}\text{H}_{20}\text{NO}$  218.1539, found 218.1540.

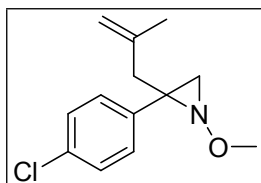

**2-(4-chlorophenyl)-1-methoxy-2-(2-methylallyl)aziridine (3n)**

colorless liquid; 75mg (63%); IR (KBr): 3075, 2984, 2939, 2894, 2808, 1649, 1598, 1494, 1465, 892, 831 $\text{cm}^{-1}$ ;  $^1\text{H}$  NMR (400 MHz,  $\text{CDCl}_3$ , TMS)  $\delta$  7.26 - 7.21 (m, 4H), 4.74 (s, 1H), 4.62 (s, 1H), 3.63(s, 3H), 2.80 - 2.72 (m, 2H), 2.35 (d, 1H,  $J=4\text{Hz}$ ), 2.16(d, 1H,  $J=3\text{Hz}$ ), 1.71 (s, 3H) ppm ;  $^{13}\text{C}$  NMR (100 MHz,  $\text{CDCl}_3$ )  $\delta$  141.9, 139.8, 132.7, 128.9, 128.3, 113.7, 60.3, 48.1, 43.4, 38.2, 23.2 ppm ; HRMS (ESI)  $m/z$  ( $\text{M}+\text{H}^+$ ) calcd for  $\text{C}_{13}\text{H}_{17}\text{ClNO}$  238.0993, found 238.0996.

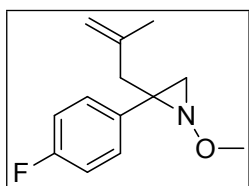

**2-(4-fluorophenyl)-1-methoxy-2-(2-methylallyl)aziridine (3o)**

colorless liquid; 73mg (66%); IR (KBr): 3074, 2987, 2940, 2896, 2810, 1650, 1605, 1512, 1466, 893, 838 $\text{cm}^{-1}$ ;  $^1\text{H}$  NMR (400 MHz,  $\text{CDCl}_3$ , TMS)  $\delta$  7.28 - 7.23 (m, 2H), 6.99-6.94 (m, 2H), 4.74 (s, 1H), 4.62 (s, 1H), 3.64 (s, 3H), 2.80 - 2.71 (m, 2H), 2.36-2.35 (m, 1H), 2.16(d, 1H,  $J=3\text{Hz}$ ), 1.71 (s, 3H) ppm ;  $^{13}\text{C}$  NMR (100 MHz,  $\text{CDCl}_3$ )  $\delta$  161.7 ( $^1J(\text{C},\text{F})=244\text{Hz}$ ), 142.0, 137.0 ( $^4J(\text{C},\text{F})=3\text{Hz}$ ), 129.2 ( $^3J(\text{C},\text{F})=8\text{Hz}$ ), 115.0 ( $^2J(\text{C},\text{F})=21\text{Hz}$ ), 113.6, 60.2, 48.2, 43.2, 38.5, 23.1 ppm ; HRMS (ESI)  $m/z$  ( $\text{M}+\text{H}^+$ ) calcd for  $\text{C}_{13}\text{H}_{17}\text{FNO}$  222.1289, found 222.1291.

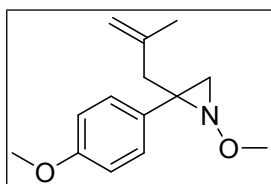

**1-methoxy-2-(4-methoxyphenyl)-2-(2-methylallyl)aziridine (3p)**

colorless liquid; 65mg (56%); IR (KBr): 3073, 3037, 2937, 2835, 2808, 1648, 1612, 1515, 1464, 890, 832 $\text{cm}^{-1}$ ;  $^1\text{H}$  NMR (400 MHz,  $\text{CDCl}_3$ , TMS)  $\delta$  7.25 - 7.19 (m, 2H), 6.83 - 6.80 (m, 2H), 4.73 (s, 1H), 4.64 (s, 1H), 3.76 (s, 3H), 3.64 (s, 3H), 2.82 - 2.69 (m, 2H), 2.40 - 2.39 (m, 1H), 2.13(d, 1H,  $J=3\text{Hz}$ ), 1.70 (s, 3H) ppm;  $^{13}\text{C}$  NMR (100MHz,  $\text{CDCl}_3$ )  $\delta$  158.5, 142.4, 133.2, 128.7, 113.5, 113.3, 60.2, 55.1, 48.3, 43.0, 38.5, 23.2 ppm; HRMS (ESI)  $m/z$  ( $\text{M}+\text{H}^+$ ) calcd for  $\text{C}_{14}\text{H}_{20}\text{NO}_2$  234.1489, found 234.1492.

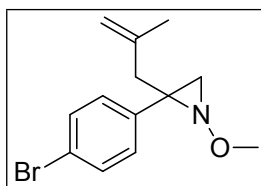

**2-(4-bromophenyl)-1-methoxy-2-(2-methylallyl)aziridine (3q)**

colorless liquid; 96mg (68%); IR (KBr): 3074, 2939, 2893, 2808, 1649, 1592, 1491, 1465, 892, 828 $\text{cm}^{-1}$ ;  $^1\text{H}$  NMR (400 MHz,  $\text{CDCl}_3$ , TMS)  $\delta$  7.41 - 7.39 (m, 2H), 7.18 - 7.16 (m, 2H), 4.74 (s, 1H), 4.62(s, 1H), 3.64 (s, 3H), 2.80 - 2.72 (m, 2H), 2.34 - 2.33 (m, 1H), 2.16(d, 1H,  $J=3\text{Hz}$ ), 1.71 (s, 3H) ppm;  $^{13}\text{C}$  NMR (100MHz,  $\text{CDCl}_3$ )  $\delta$  141.9, 140.3, 131.2, 129.2, 120.8, 113.7, 60.3, 48.0, 43.4, 38.7, 23.2 ppm; HRMS (ESI)  $m/z$  ( $\text{M}+\text{H}^+$ ) calcd for  $\text{C}_{13}\text{H}_{17}^{79}\text{BrNO}$  282.0494, found 282.0493;  $\text{C}_{13}\text{H}_{17}^{81}\text{BrNO}$  284.0473, found 284.0471.

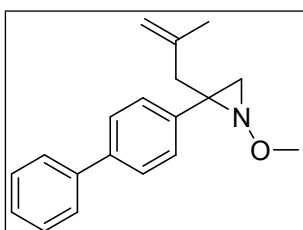

**2-([1,1'-biphenyl]-4-yl)-1-methoxy-2-(2-methylallyl)aziridine (3r)**

colorless liquid; 113mg (81%); IR (KBr): 3074, 3029, 2983, 2938, 2893, 2807, 1650, 1600, 1512, 1465, 891, 843 $\text{cm}^{-1}$ ;  $^1\text{H}$  NMR (400 MHz,  $\text{CDCl}_3$ , TMS)  $\delta$  7.56 - 7.50 (m, 4H), 7.41 - 7.34 (m, 4H), 7.32 -

7.28 (m, 1H), 4.76 (s, 1H), 4.70 (s, 1H), 3.65 (s, 3H), 2.89 - 2.76 (m, 2H), 2.44 - 2.43 (m, 1H), 2.19 (d, 1H,  $J=3\text{Hz}$ ), 1.74 (s, 3H) ppm;  $^{13}\text{C}$  NMR (100MHz,  $\text{CDCl}_3$ )  $\delta$  142.2, 140.7, 140.2, 139.7, 128.6, 127.8, 127.1, 127.0, 126.8, 113.4, 60.2, 48.2, 43.4, 38.0, 23.2 ppm; HRMS (ESI)  $m/z$  ( $\text{M}+\text{H}^+$ ) calcd for  $\text{C}_{19}\text{H}_{22}\text{NO}$  280.1696, found 280.1702.

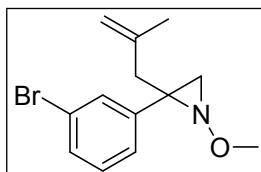

**2-(3-bromophenyl)-1-methoxy-2-(2-methylallyl)aziridine (3s)**

colorless liquid; 100mg (71%); IR (KBr): 3073, 2938, 2894, 2808, 1650, 1595, 1477, 1466, 890, 892, 791, 693 $\text{cm}^{-1}$ ;  $^1\text{H}$  NMR (400MHz,  $\text{CDCl}_3$ , TMS)  $\delta$  7.44 - 7.43 (m, 1H), 7.35 - 7.32(m, 1H), 7.24 - 7.21 (m, 1H),

7.16 - 7.12 (t, 1H), 4.76 (s, 1H), 4.64 (s, 1H), 3.64 (s, 3H), 2.80 - 2.72 (t, 2H), 2.35 - 2.34 (m, 1H), 2.16 (d, 1H,  $J=3\text{Hz}$ ), 1.72 (s, 3H) ppm;  $^{13}\text{C}$  NMR (100MHz,  $\text{CDCl}_3$ )  $\delta$  143.6, 141.8, 130.6, 130.1, 129.6, 126.2, 122.2, 113.7, 60.3, 48.0, 43.4, 38.00, 23.2 ppm; HRMS (ESI)  $m/z$  ( $\text{M}+\text{H}^+$ ) calcd for  $\text{C}_{13}\text{H}_{17}^{79}\text{BrNO}$  282.0494, found 282.0499;  $\text{C}_{13}\text{H}_{17}^{81}\text{BrNO}$  284.0473, found 284.0467.

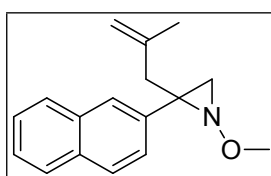

**1-methoxy-2-(2-methylallyl)-2-(naphthalen-2-yl)aziridine (3t)**

colorless liquid; 87mg (69%); IR (KBr): 3057, 3020, 2938, 2893, 2807, 1649, 1600, 1507, 1465, 892 $\text{cm}^{-1}$ ;  $^1\text{H}$  NMR (400 MHz,  $\text{CDCl}_3$ , TMS)  $\delta$  7.78 - 7.76 (m, 3H), 7.70- 7.70 (m, 1H), 7.48 - 7.40 (m, 3H), 4.71 (s,

1H), 4.66 (s, 1H), 3.69 (s, 3H), 2.95 - 2.82 (m, 2H), 2.51 - 2.50(m, 1H), 2.23 (d, 1H,  $J=3\text{Hz}$ ), 1.73 (s, 3H) ppm;  $^{13}\text{C}$  NMR (100MHz,  $\text{CDCl}_3$ )  $\delta$  142.2, 138.6, 133.1, 132.5, 127.9, 127.8, 127.5, 126.4, 125.9, 125.7, 125.6, 113.6, 60.3, 48.9, 43.3, 38.3, 23.2 ppm; HRMS (ESI)  $m/z$  ( $\text{M}+\text{H}^+$ ) calcd for  $\text{C}_{17}\text{H}_{20}\text{NO}$  254.1539, found 254.1540.

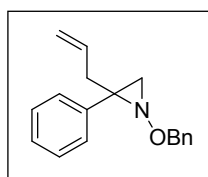

**2-allyl-1-(benzyloxy)-2-phenylaziridine (3u):**

colorless liquid; 93mg (70%); IR (KBr): 3063, 3030, 2979, 2914, 2855, 1640, 1602, 1495, 1453, 976, 914, 750, 700 $\text{cm}^{-1}$ ;  $^1\text{H}$  NMR (400 MHz,  $\text{CDCl}_3$ , TMS)  $\delta$  7.40 - 7.18 (m, 10H), 5.81 - 5.71 (m, 1H), 5.01 - 4.82 (m, 4H), 2.88 -

2.82 (m, 1H), 2.76 - 2.70 (m, 1H), 2.29 - 2.28 (m, 1H), 2.16 - 2.15 (m, 1H) ppm;  $^{13}\text{C}$  NMR (100MHz,  $\text{CDCl}_3$ )  $\delta$  141.0, 137.5, 134.8, 128.6, 128.5, 128.3, 128.1, 127.8, 127.8, 127.0, 117.2, 75.2, 49.7, 42.9, 35.9 ppm; HRMS (ESI)  $m/z$  ( $\text{M}+\text{H}^+$ ) calcd for  $\text{C}_{18}\text{H}_{20}\text{NO}$  266.1539, found 266.1544.

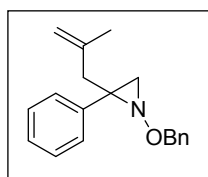

**1-(benzyloxy)-2-(2-methylallyl)-2-phenylaziridine (3v):**

colorless liquid; 88mg (63%); IR (KBr): 3063, 3030, 2967, 2915, 2855, 1649, 1603, 1495, 1453, 890, 749, 697 $\text{cm}^{-1}$ ;  $^1\text{H}$  NMR (400 MHz,  $\text{CDCl}_3$ , TMS)  $\delta$  7.40 - 7.30 (m, 5H), 7.25- 7.17 (m, 5H), 4.87 (m, 2H), 4.71 - 4.70 (m, 1H),

4.61 - 4.60 (m, 1H), 2.76 (m, 2H), 2.44 - 2.43 (m, 1H), 2.23 - 2.22 (m, 1H), 1.69 (s, 3H) ppm;  $^{13}\text{C}$  NMR (100MHz,  $\text{CDCl}_3$ )  $\delta$  142.3, 141.1, 137.5, 128.7, 128.3, 128.0, 127.9, 127.5, 126.9, 75.2, 48.6, 43.2, 38.9, 23.2 ppm; HRMS (ESI)  $m/z$  ( $\text{M}+\text{H}^+$ ) calcd for  $\text{C}_{19}\text{H}_{22}\text{NO}$  280.1696, found 280.1702.

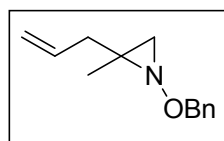

**2-allyl-1-(benzyloxy)-2-methylaziridine (3w):**

colorless liquid; 84mg (83%);  $^1\text{H}$  NMR (400MHz,  $\text{CDCl}_3$ , TMS)  $\delta$  7.36 - 7.27 (m, 5H), 5.89 - 5.69 (m, 1H), 5.13 - 5.04 (m, 2H), 4.78 - 4.68 (m, 2H),



2.48 - 2.42 & 2.33 - 2.27 & 2.09 - 1.96 (m, 2H), 1.86 - 1.81 (m, 1H), 1.75 - 1.70 (m, 1H), 1.30 & 1.08 (s, 1H) ppm;  $^{13}\text{C}$  NMR (100MHz,  $\text{CDCl}_3$ )  $\delta$  137.5, 137.5, 135.3, 133.9, 128.5, 128.5, 128.2, 128.2, 127.7, 117.3, 117.0, 43.5, 43.4, 42.6, 42.4, 42.0, 36.0, 21.9, 15.2 ppm; HRMS (ESI)  $m/z$  ( $\text{M}+\text{H}^+$ ) calcd for  $\text{C}_{13}\text{H}_{18}\text{NO}$  204.1383, found 204.1380.

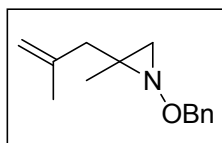

**1-(benzyloxy)-2-methyl-2-(2-methylallyl)aziridine (3x):**

colorless liquid; 93mg (86%);  $^1\text{H}$  NMR (400MHz,  $\text{CDCl}_3$ , TMS)  $\delta$  7.37 - 7.24 (m, 5H), 4.81 - 4.71 (m, 4H), 2.38 - 2.27 & 2.12 - 2.08 & 1.74 - 1.71 (m, 2H), 1.91 - 1.86 (m, 2H), 1.73 (s, 3H), 1.30 & 1.04 (s, 3H) ppm;  $^{13}\text{C}$  NMR (100MHz,  $\text{CDCl}_3$ )  $\delta$  142.6, 141.9, 137.2, 137.1, 128.1, 128.1, 127.8, 127.4, 127.3, 112.5, 112.5, 74.4, 74.4, 45.8, 42.7, 42.5, 42.2, 41.9, 39.1, 22.5, 22.2, 21.6, 14.7 ppm; HRMS (ESI)  $m/z$  ( $\text{M}+\text{H}^+$ ) calcd for  $\text{C}_{14}\text{H}_{20}\text{NO}$  218.1539, found 218.1540.

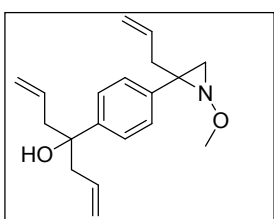

**4-(4-(2-allyl-1-methoxyaziridin-2-yl)phenyl)hepta-1,6-dien-4-ol (3y)**

colorless liquid; 90mg (60%);  $^1\text{H}$  NMR (400 MHz,  $\text{CDCl}_3$ , TMS)  $\delta$  7.34 - 7.32 (m, 2H), 7.29 - 7.26 (m, 2H), 5.83 - 5.72 (m, 1H), 5.63 - 5.52 (m, 2H), 5.11 - 4.98 (m, 6H), 3.65 (s, 3H), 2.85 - 2.75 (m, 2H), 2.68 - 2.62 (m, 2H), 2.51 - 2.45 (m, 2H), 2.27 - 2.26 (m, 1H), 2.20 (s, 1H), 2.10 - 2.09 (m, 1H) ppm;  $^{13}\text{C}$  NMR (100 MHz,  $\text{CDCl}_3$ )  $\delta$  144.6, 139.2, 134.7, 133.3, 127.5, 125.2, 119.1, 119.0, 117.1, 74.9, 60.3, 49.6, 46.7, 46.6, 42.8, 35.4 ppm; HRMS (ESI)  $m/z$  ( $\text{M}+\text{H}^+$ ) calcd for  $\text{C}_{19}\text{H}_{26}\text{NO}_2$  300.1958, found 300.1955.

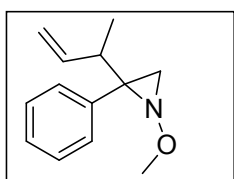

**2-(but-3-en-2-yl)-1-methoxy-2-phenylaziridine (3z)**

colorless liquid; 31mg (31%);  $^1\text{H}$  NMR (400 MHz,  $\text{CDCl}_3$ , TMS)  $\delta$  7.31 - 7.2 (m, 5H), 5.92 - 5.84 (m, 1H), 5.05 - 4.97 (m, 2H), 3.71 (s, 3H), 2.78 - 2.70 (m, 1H), 2.17 (d, 1H,  $J=2.4\text{Hz}$ ), 2.06 (d, 1H,  $J=2.4\text{Hz}$ ), 1.03 (d, 3H,  $J=6.8\text{Hz}$ ) ppm;  $^{13}\text{C}$  NMR (100 MHz,  $\text{CDCl}_3$ )  $\delta$  141.1, 138.5, 129.8, 127.6, 127.1, 114.4, 60.4, 54.8, 43.1, 38.8, 16.3 ppm; HRMS (ESI)  $m/z$  ( $\text{M}+\text{H}^+$ ) calcd for  $\text{C}_{13}\text{H}_{18}\text{NO}$  204.1383, found 204.1380.

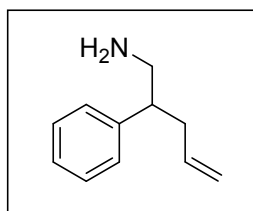

**2-phenylpent-4-en-1-amine (4aa)**

colorless liquid;  $^1\text{H}$  NMR (400 MHz,  $\text{CDCl}_3$ , TMS)  $\delta$  7.34 - 7.30 (m, 2H), 7.25 - 7.18 (m, 3H), 5.72 - 5.62 (m, 1H), 5.04 - 4.94 (m, 2H), 3.24 (s, 2H), 3.07 - 3.02 (m, 1H), 2.92 - 2.78 (m, 2H), 2.47 - 2.33 (m, 2H) ppm;  $^{13}\text{C}$  NMR (100 MHz,  $\text{CDCl}_3$ )  $\delta$  141.9, 135.9, 128.7, 127.9, 126.9, 116.7, 47.5, 46.4, 38.2 ppm; LC-MS (EI)  $m/z$  ( $\text{M}+\text{H}^+$ ) calcd for  $\text{C}_{13}\text{H}_{18}\text{NO}$  162.1, found 162.2.

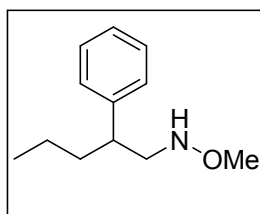

**O-methyl-N-(2-phenylpentyl)hydroxylamine (4ab)**

colorless liquid;  $^1\text{H}$  NMR (400 MHz,  $\text{CDCl}_3$ , TMS)  $\delta$  7.33 - 7.29 (m, 2H), 7.23 - 7.17 (m, 3H), 5.34 (s, 1H), 3.48 (s, 3H), 3.24 - 3.20 (m, 1H), 3.01 - 2.87 (m, 2H), 1.68 - 1.51 (m, 2H), 1.23 - 1.15 (m, 2H), 0.86 (t, 3H,  $J=8\text{Hz}$ ) ppm;  $^{13}\text{C}$  NMR (100 MHz,  $\text{CDCl}_3$ )  $\delta$  143.2, 128.5, 127.8, 126.5, 61.4, 57.5, 42.9, 36.5, 20.5, 14.0 ppm; HRMS (ESI)  $m/z$  ( $\text{M}+\text{H}^+$ ) calcd for  $\text{C}_{12}\text{H}_{20}\text{NO}$

194.1539, found 194.1534.

## References:

- [1] (a) T. C. Wabnitz, S. Saaby, K. A. Jørgensen *Org. Biomol. Chem.*, **2014**, *2*, 828;(b) X. X. Qi, L. Dai, C. M. Park, *Chem. Commun.*, **2012**, *48*, 11244; (c) B. Noverges, C. Mollar, M. Medio-Simón, G. Asensio *Adv. Synth. Catal.* **2015**, *357*, 430; (d) T. Tsuritani, K. Yagi, H. Shinokubo, K. Oshima *Angew. Chem.* **2003**, *115*, 5771.

# $^1\text{H}$ and $^{13}\text{C}$ of all compounds

## $^1\text{H}$ and $^{13}\text{C}$ of 1a

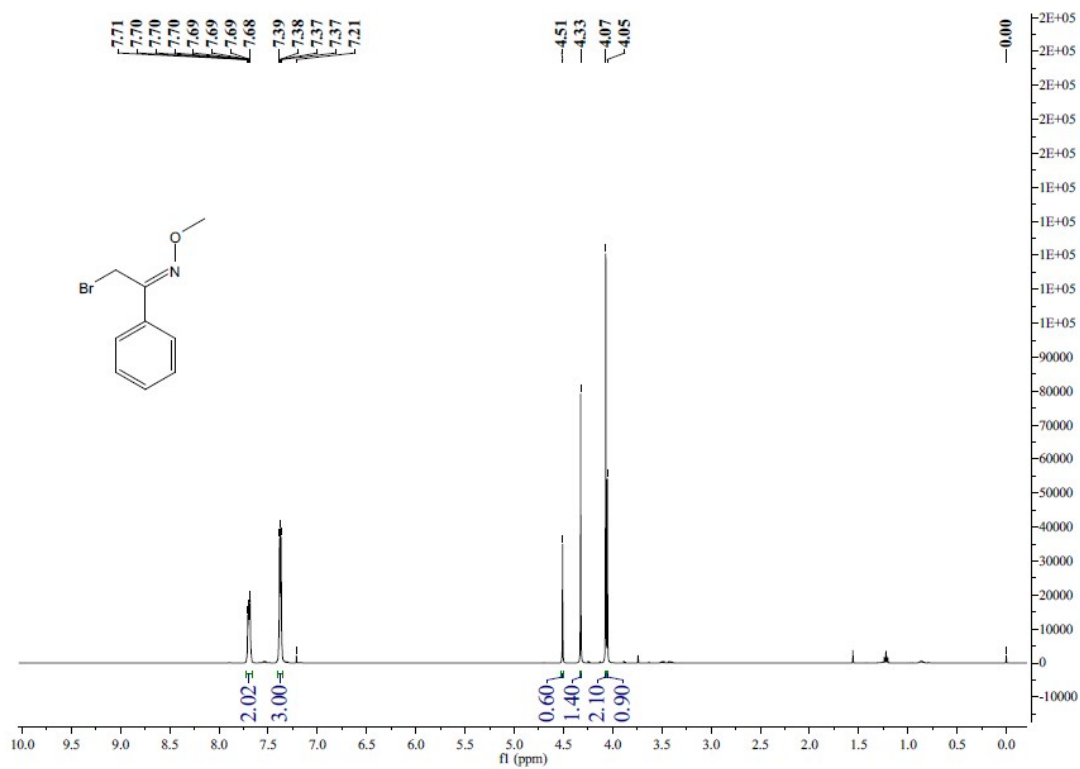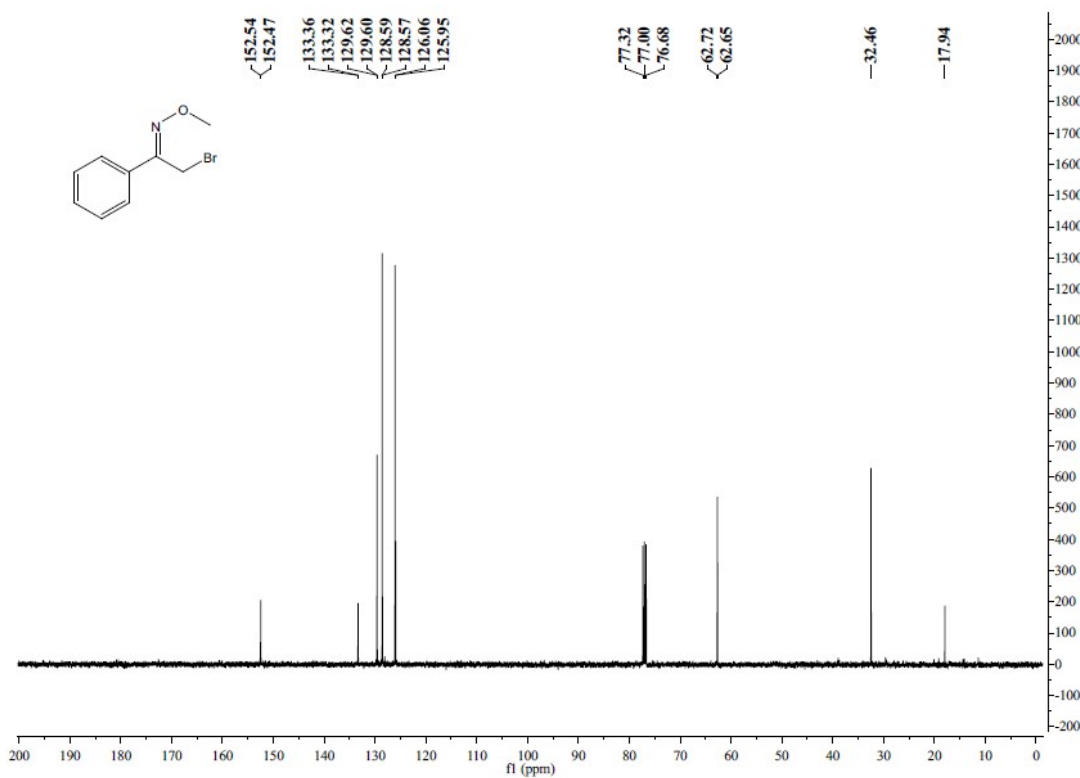

$^1\text{H}$  and  $^{13}\text{C}$  of **1b**

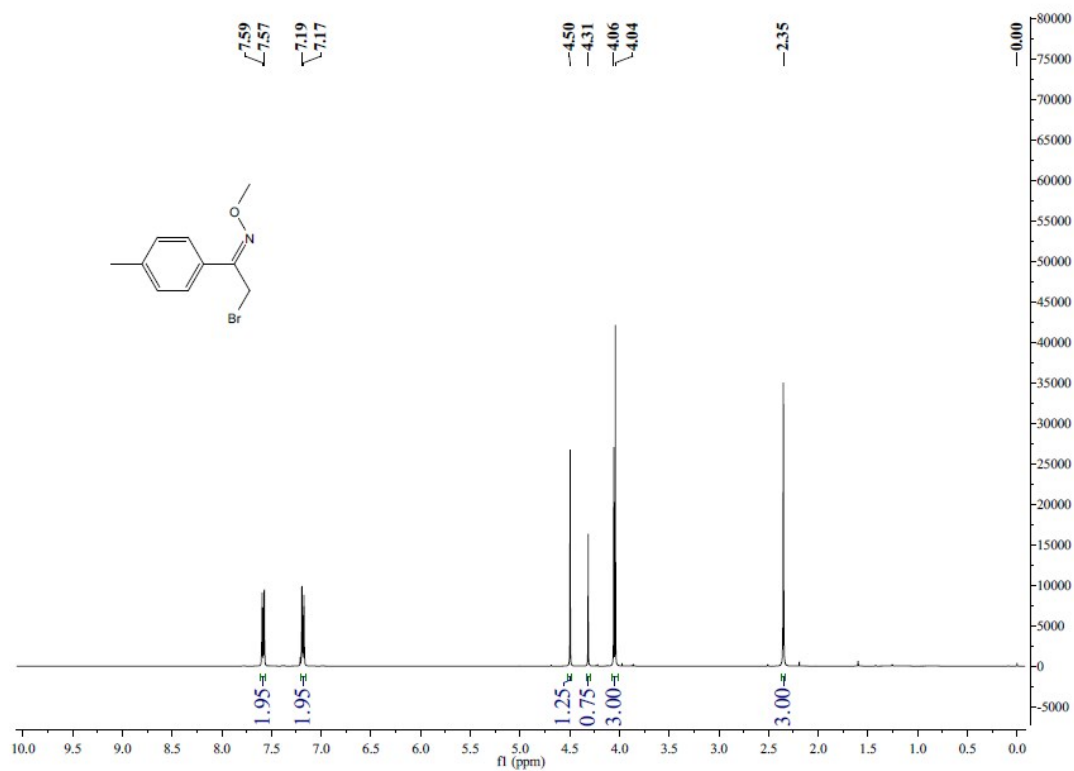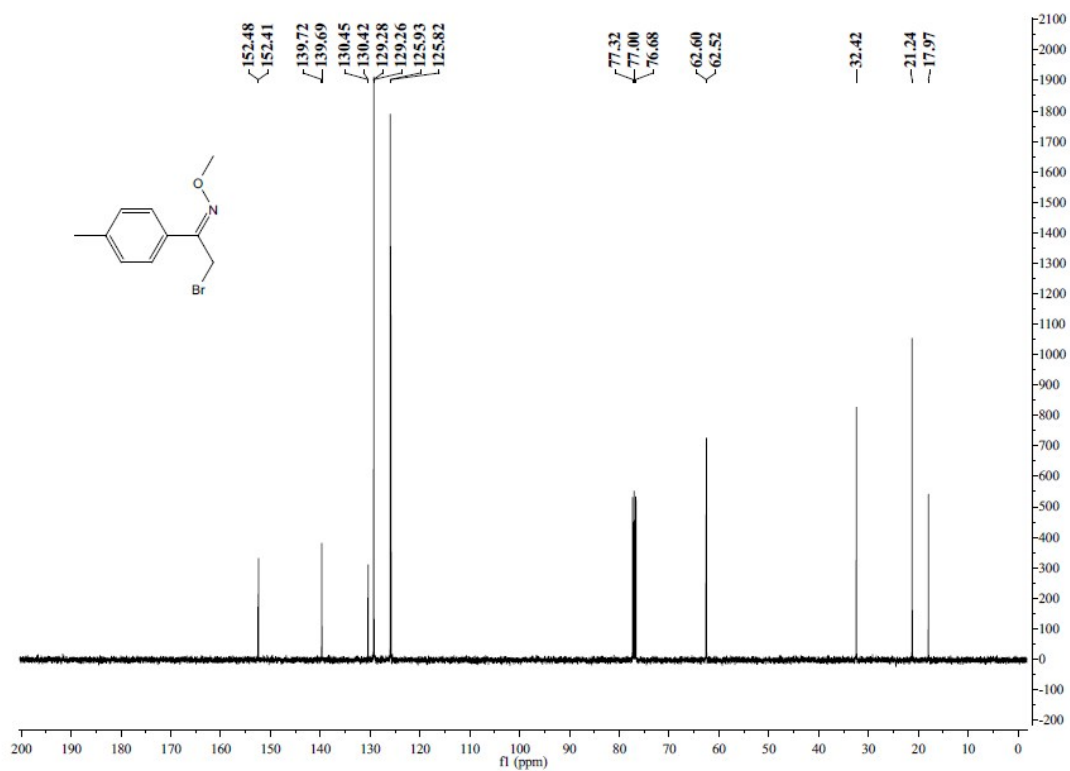

$^1\text{H}$  and  $^{13}\text{C}$  of **1c**

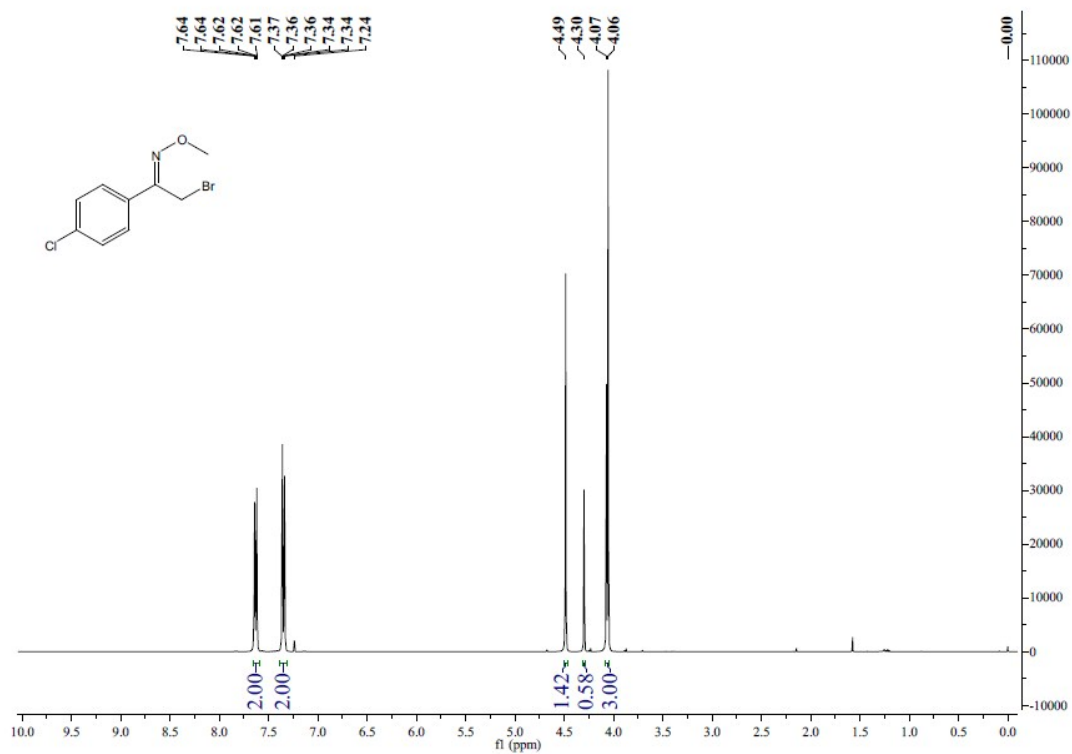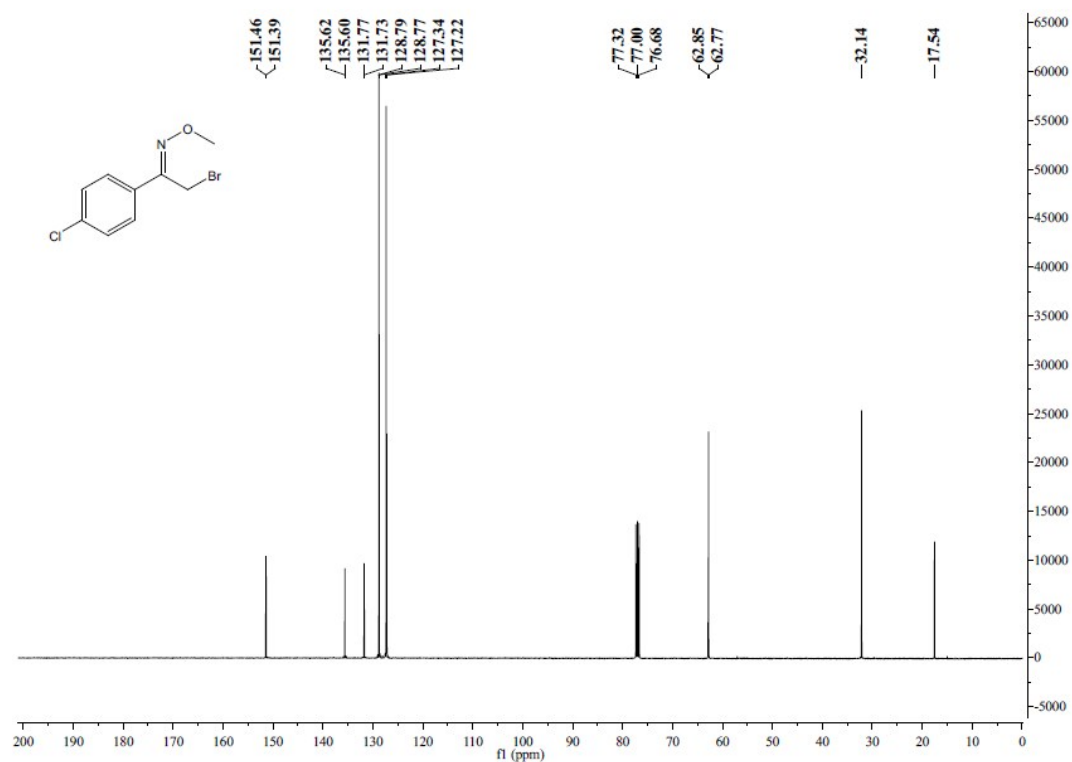

# $^1\text{H}$ and $^{13}\text{C}$ of **1d**

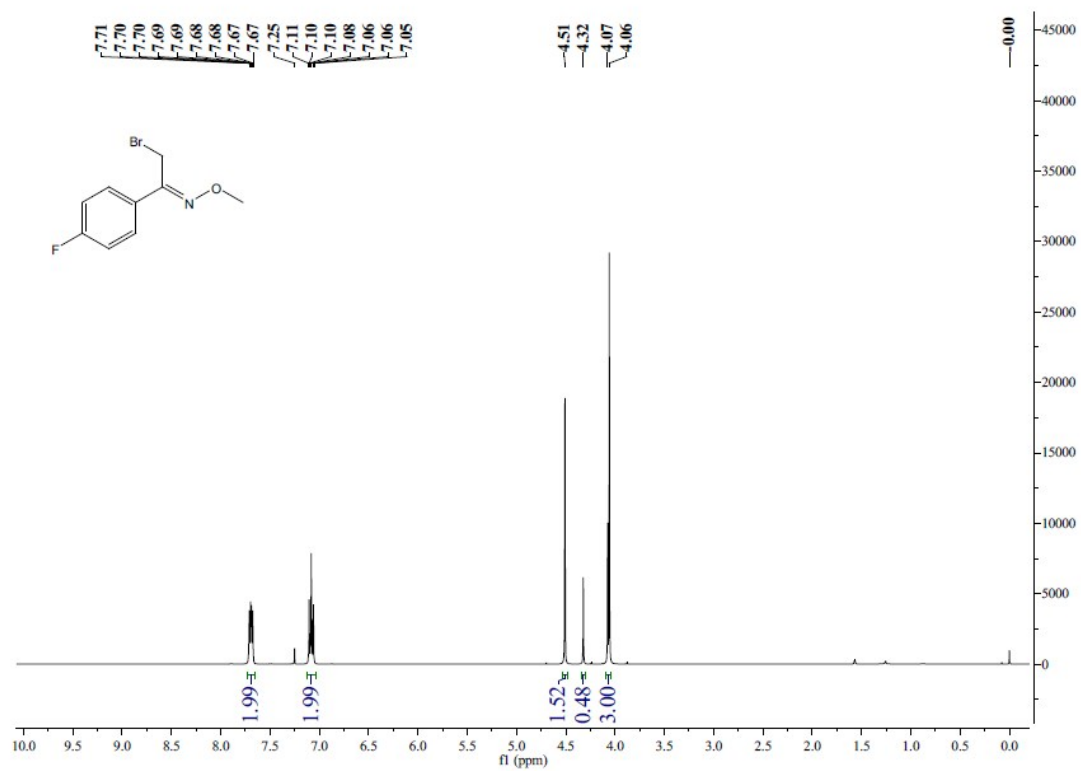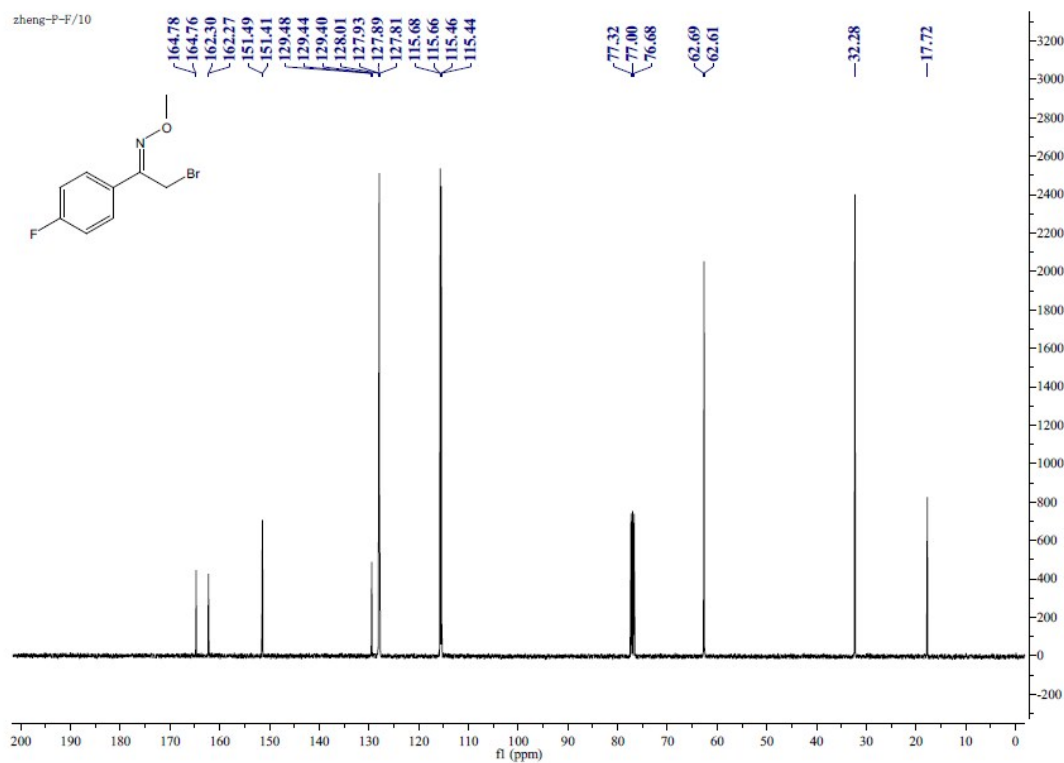

$^1\text{H}$  and  $^{13}\text{C}$  of **1e**

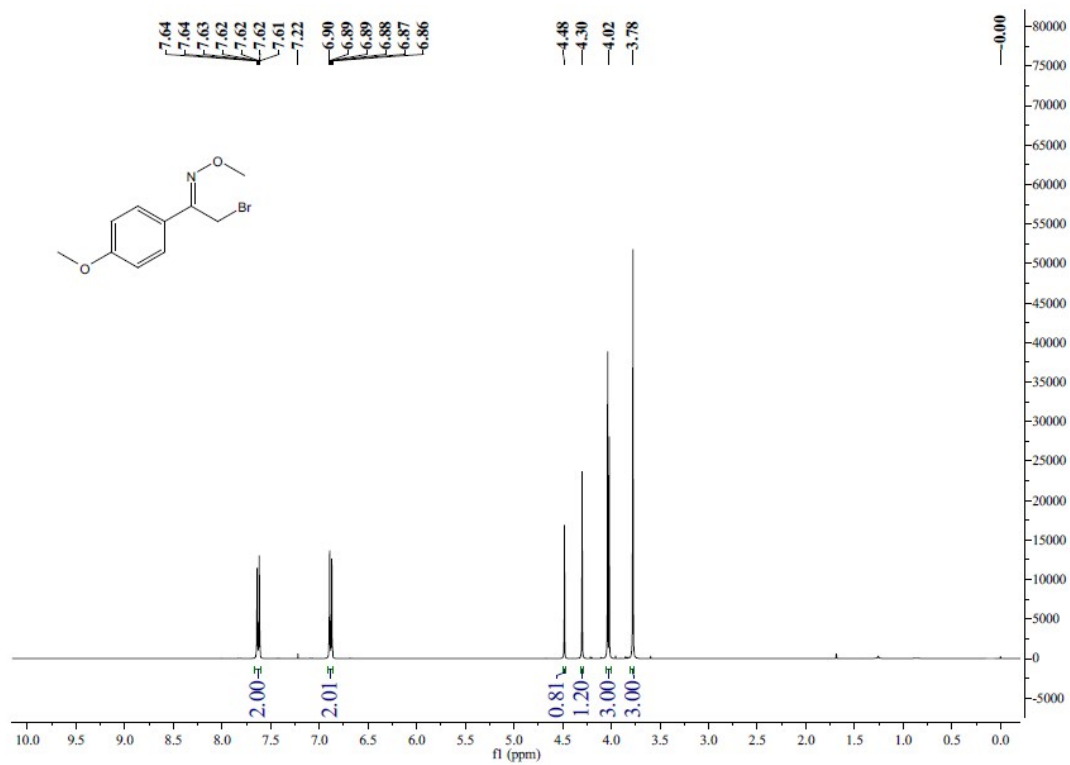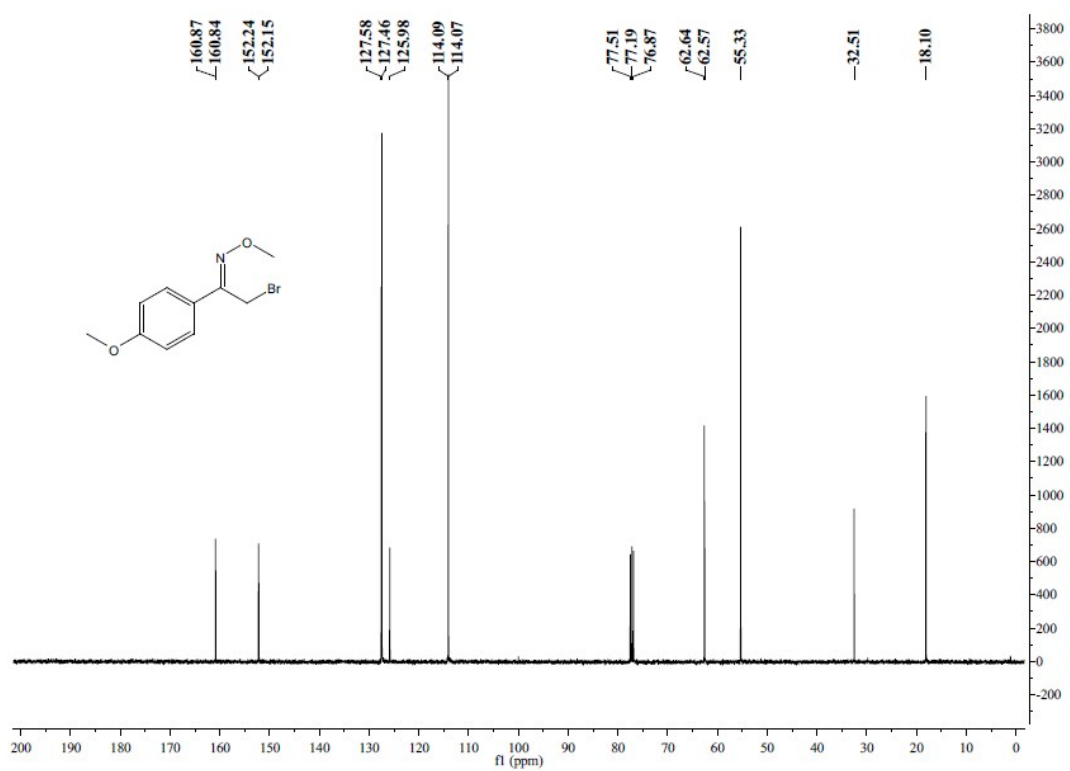

$^1\text{H}$  and  $^{13}\text{C}$  of **1f**

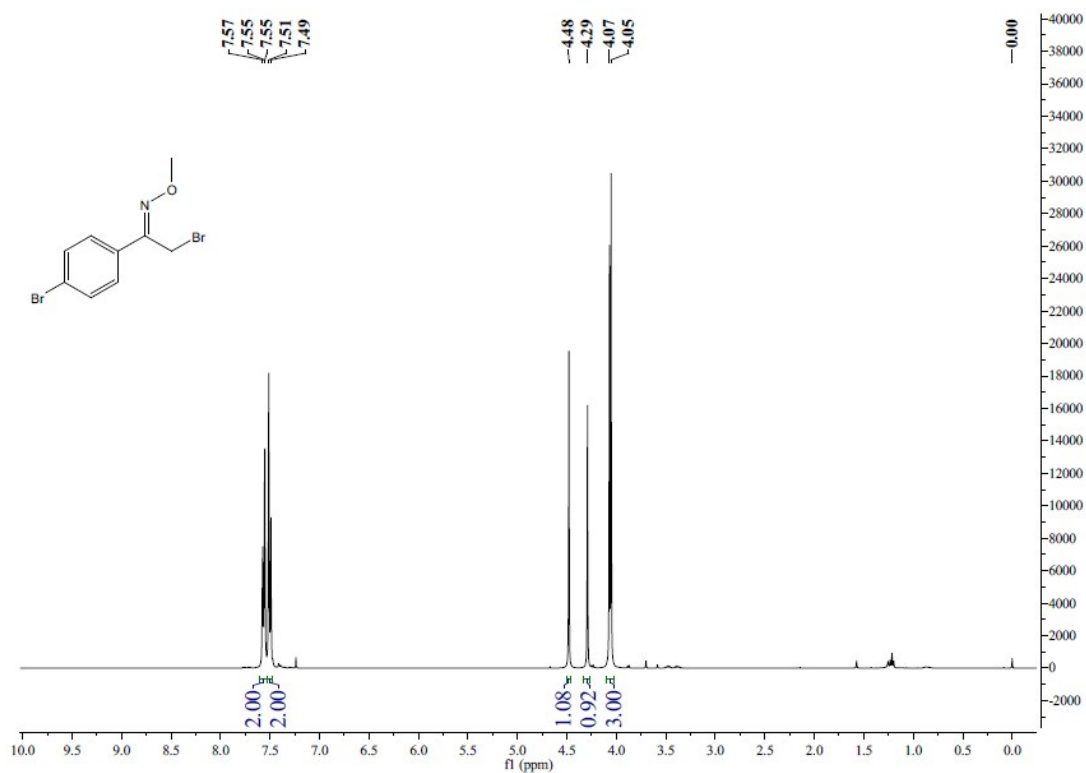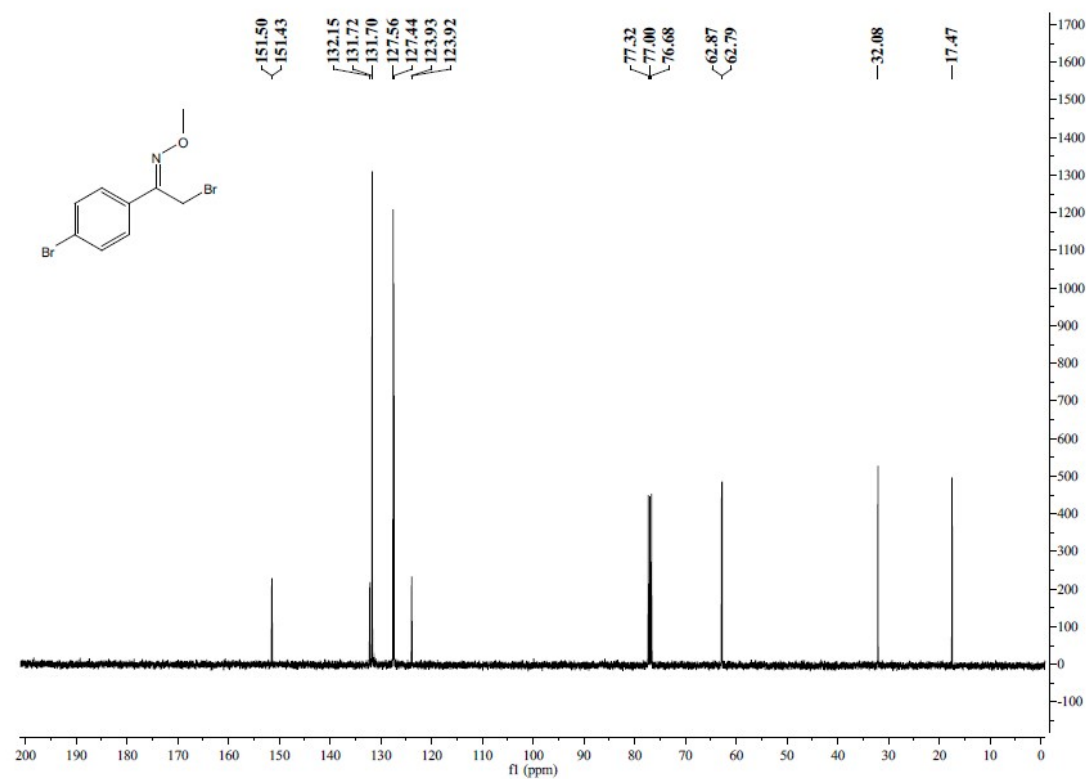



$^1\text{H}$  and  $^{13}\text{C}$  of **1g**

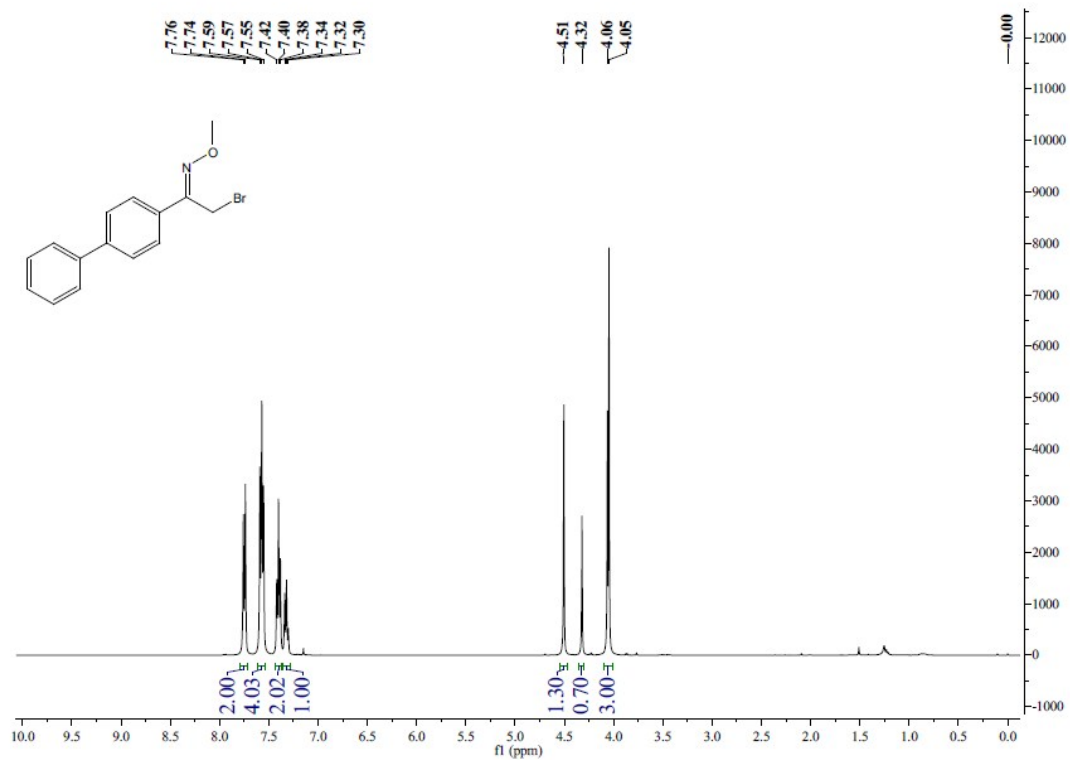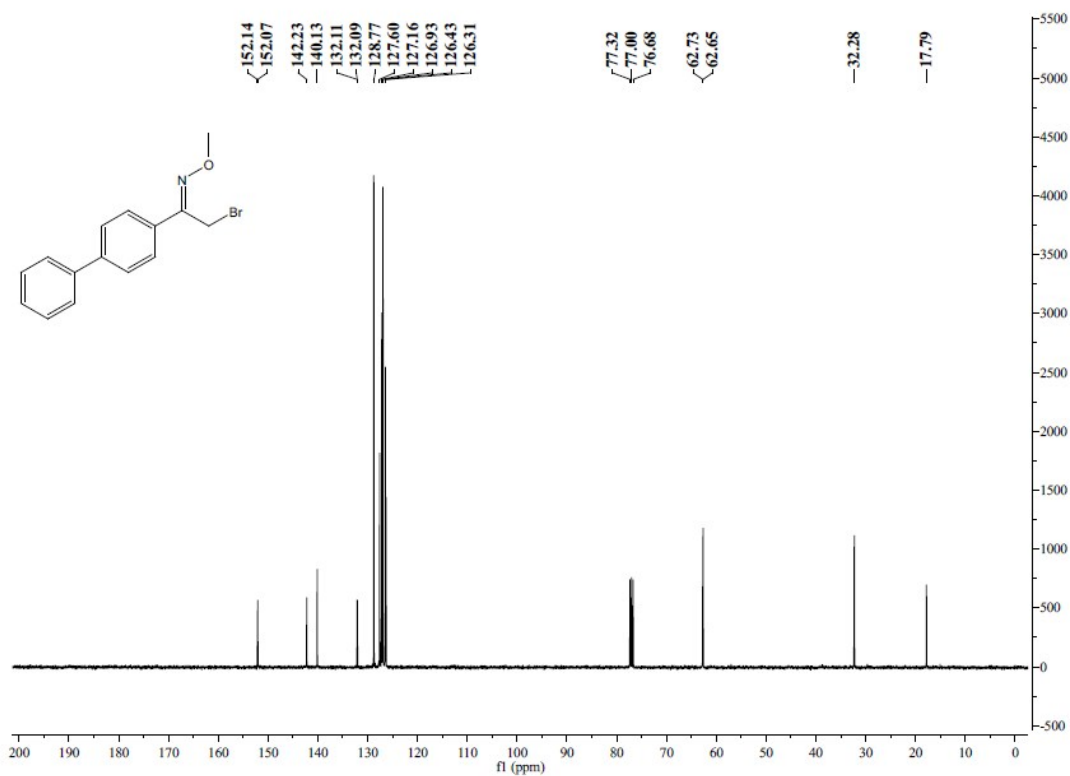

$^1\text{H}$  and  $^{13}\text{C}$  of **1h**

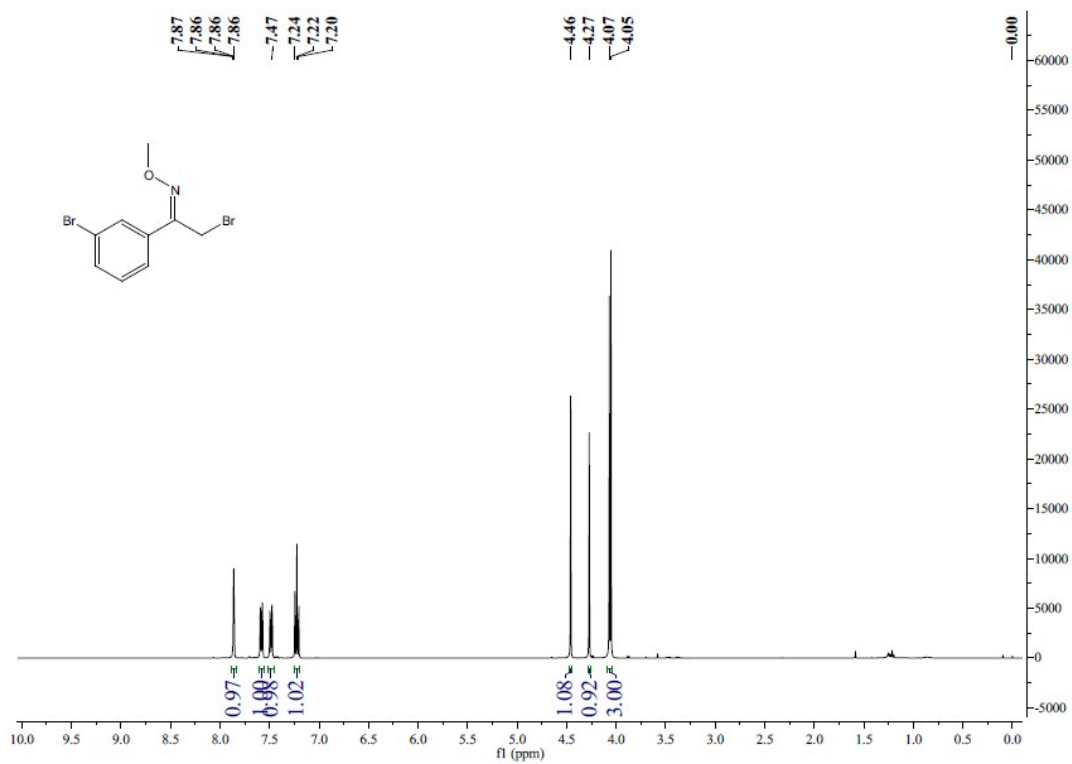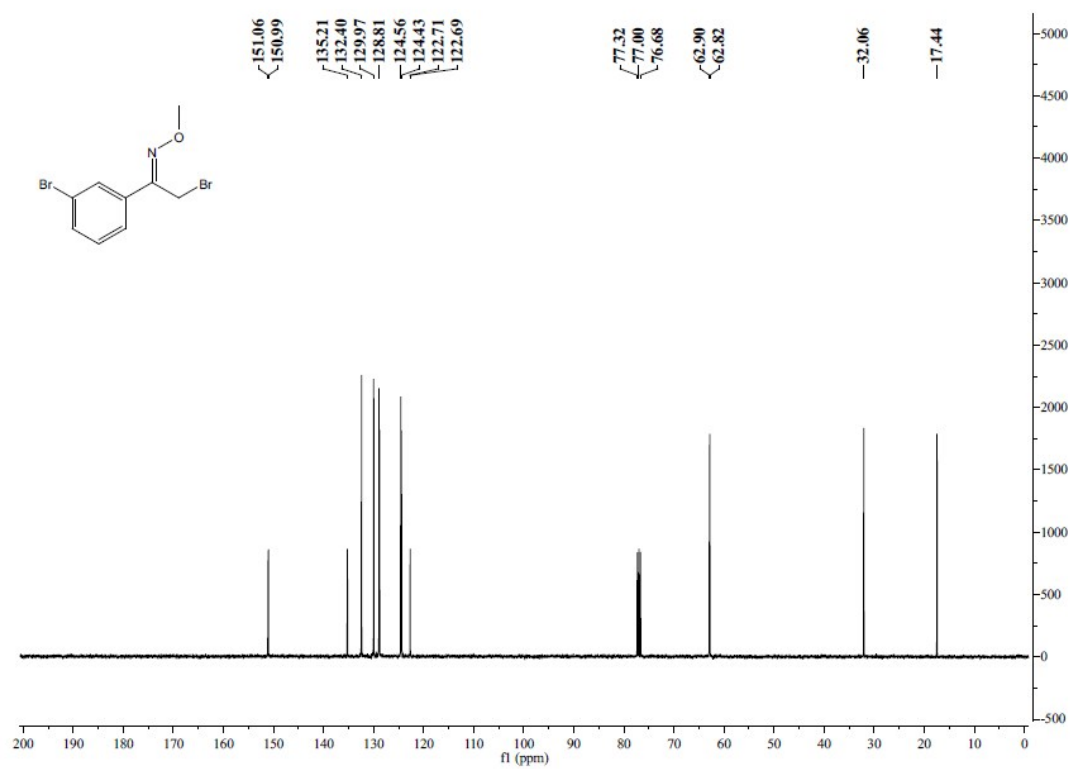

$^1\text{H}$  and  $^{13}\text{C}$  of **1i**

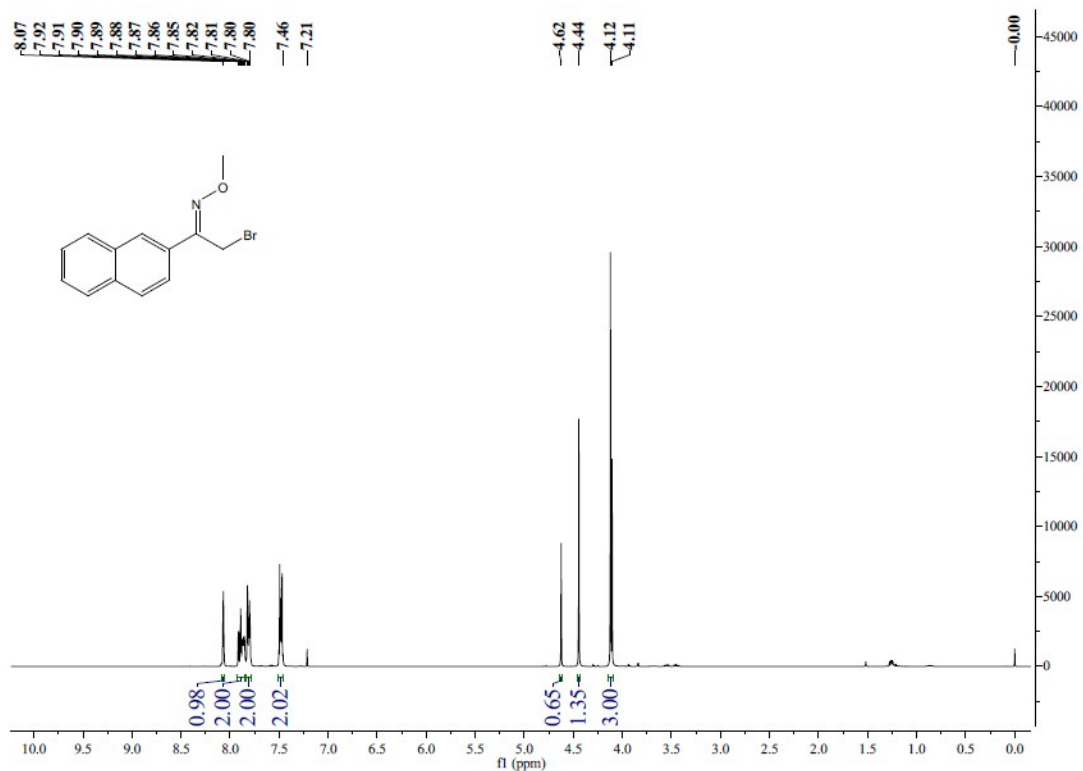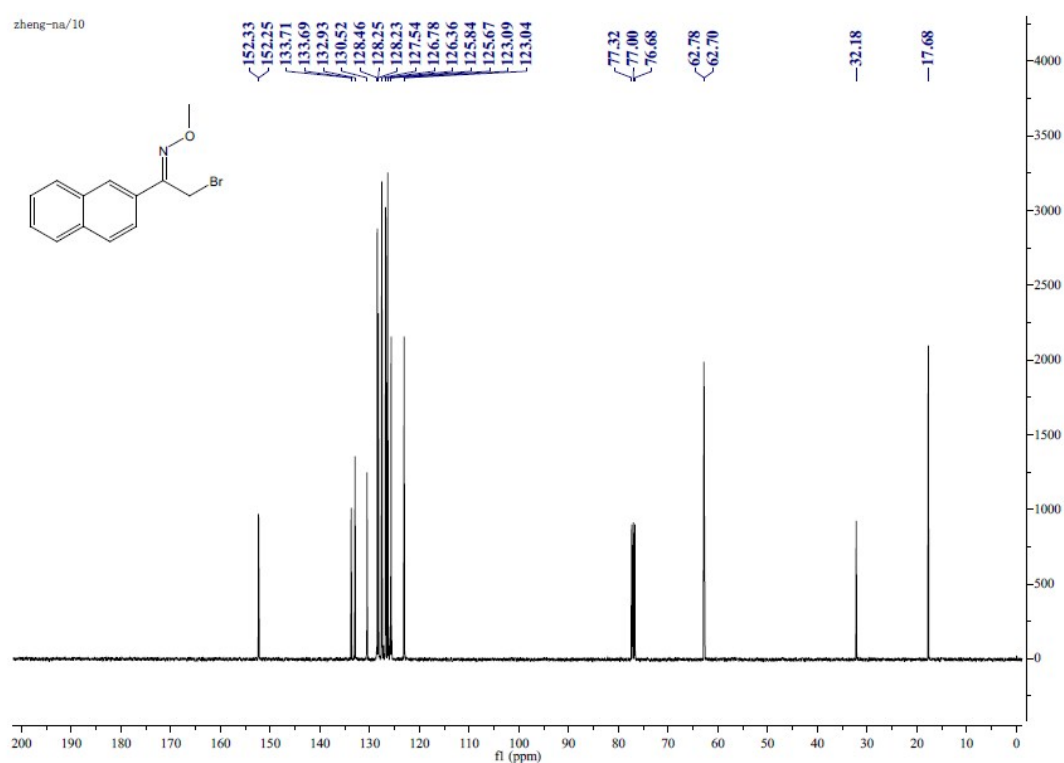

$^1\text{H}$  and  $^{13}\text{C}$  of **1k**

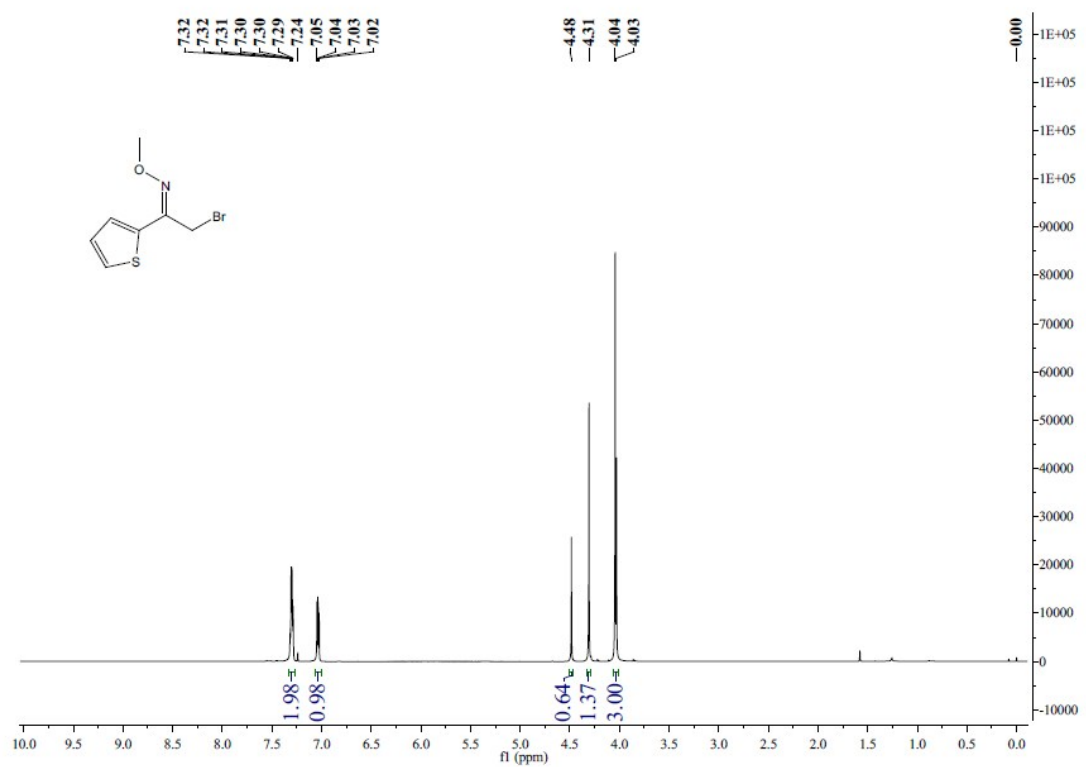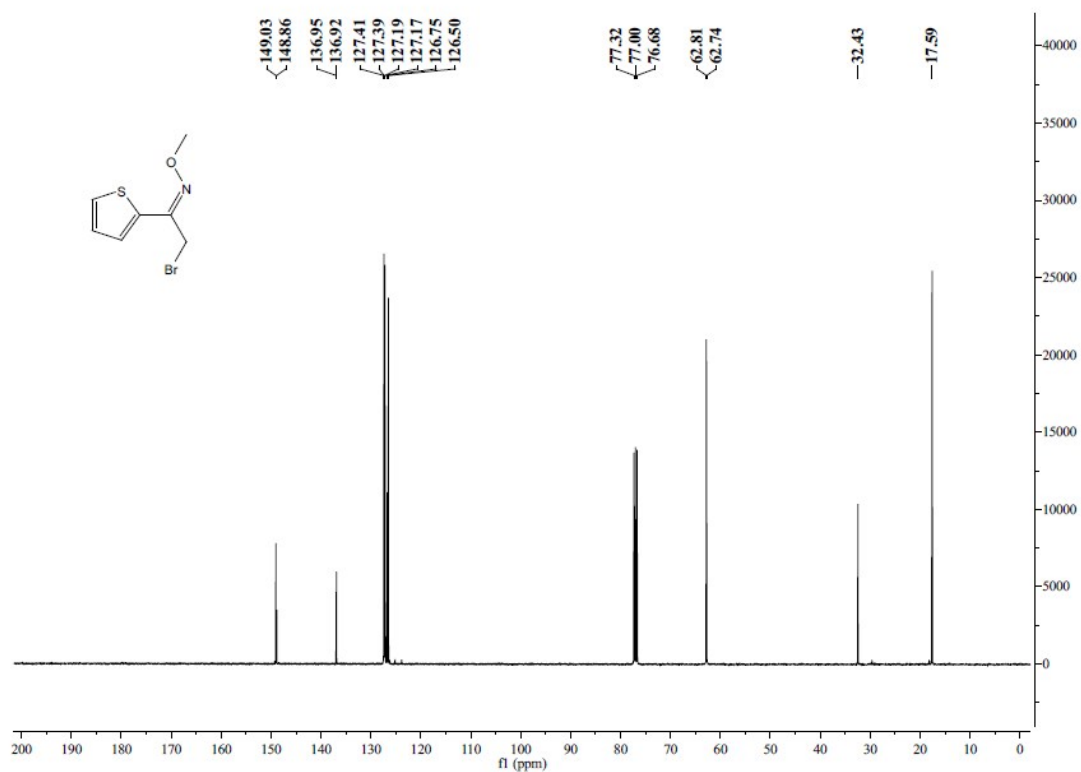

$^1\text{H}$  and  $^{13}\text{C}$  of **11**

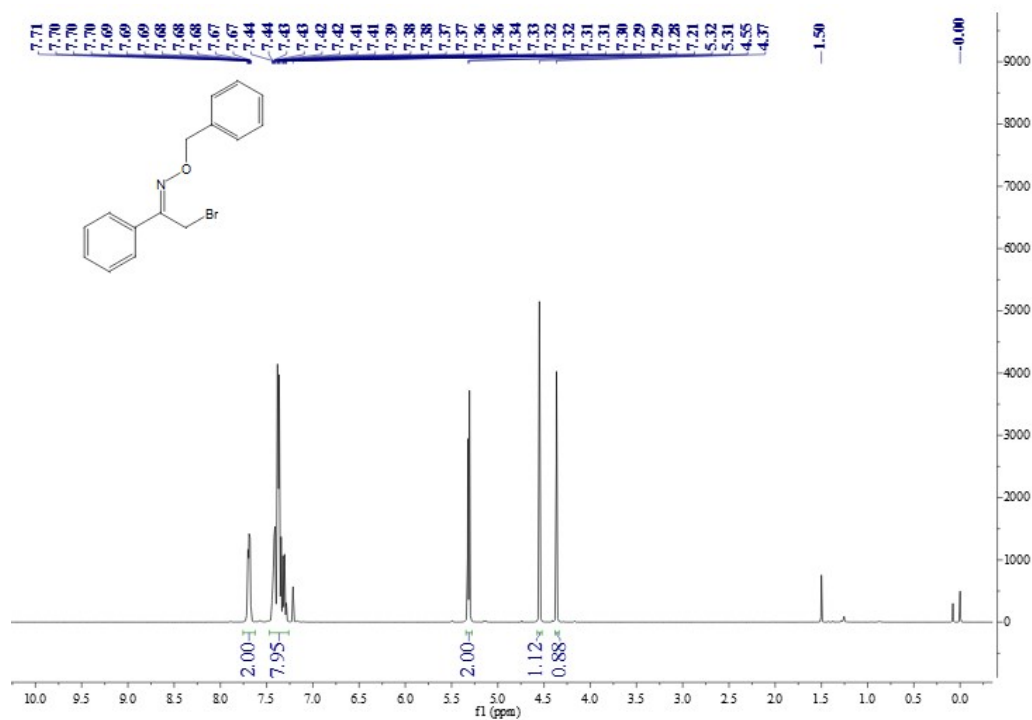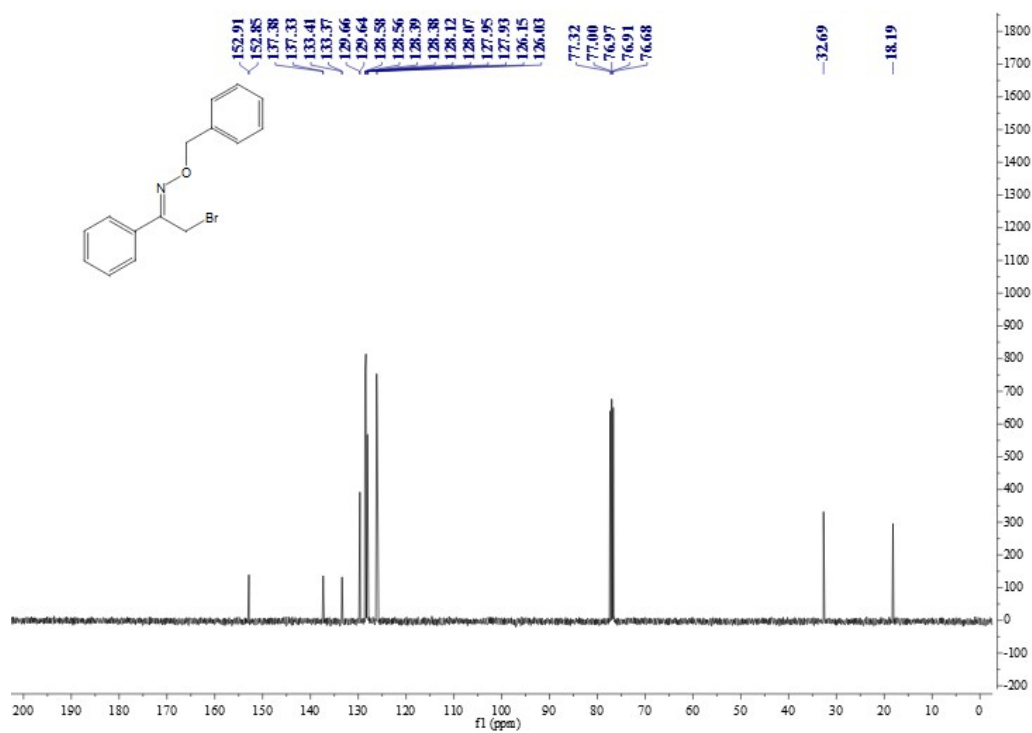

$^1\text{H}$  and  $^{13}\text{C}$  of **1m**

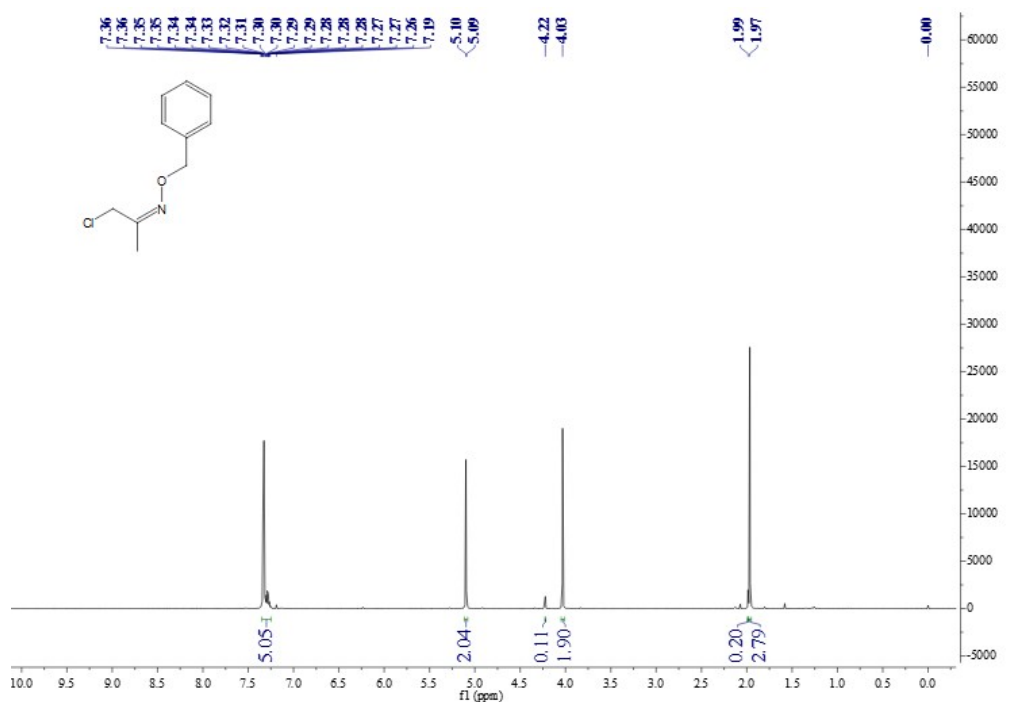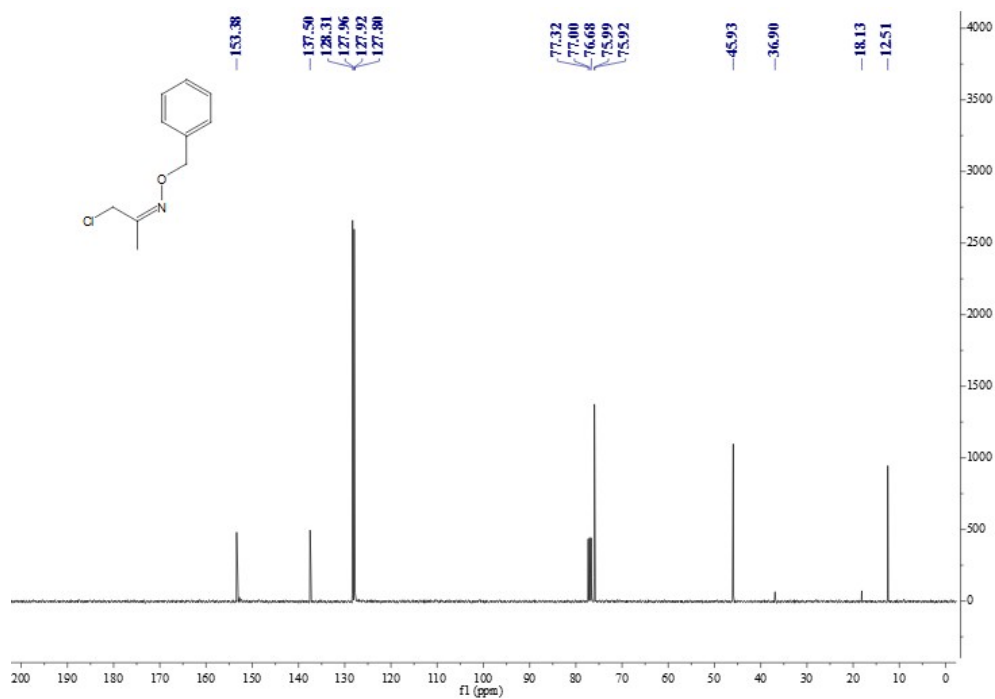

# $^1\text{H}$ and $^{13}\text{C}$ of **1n**

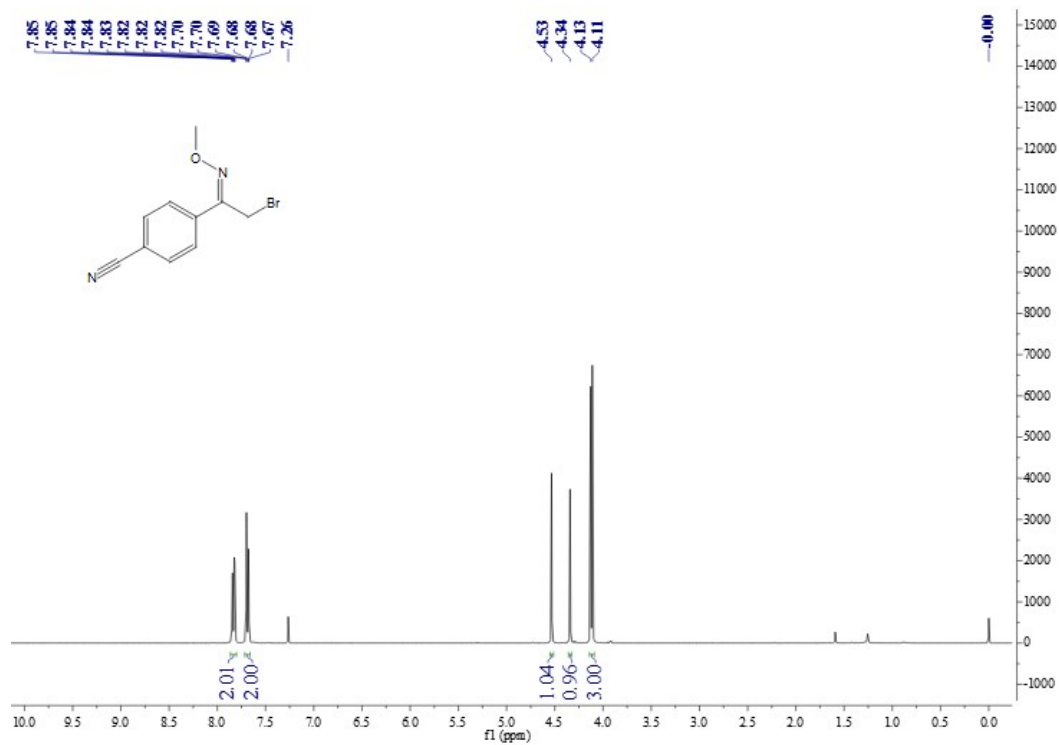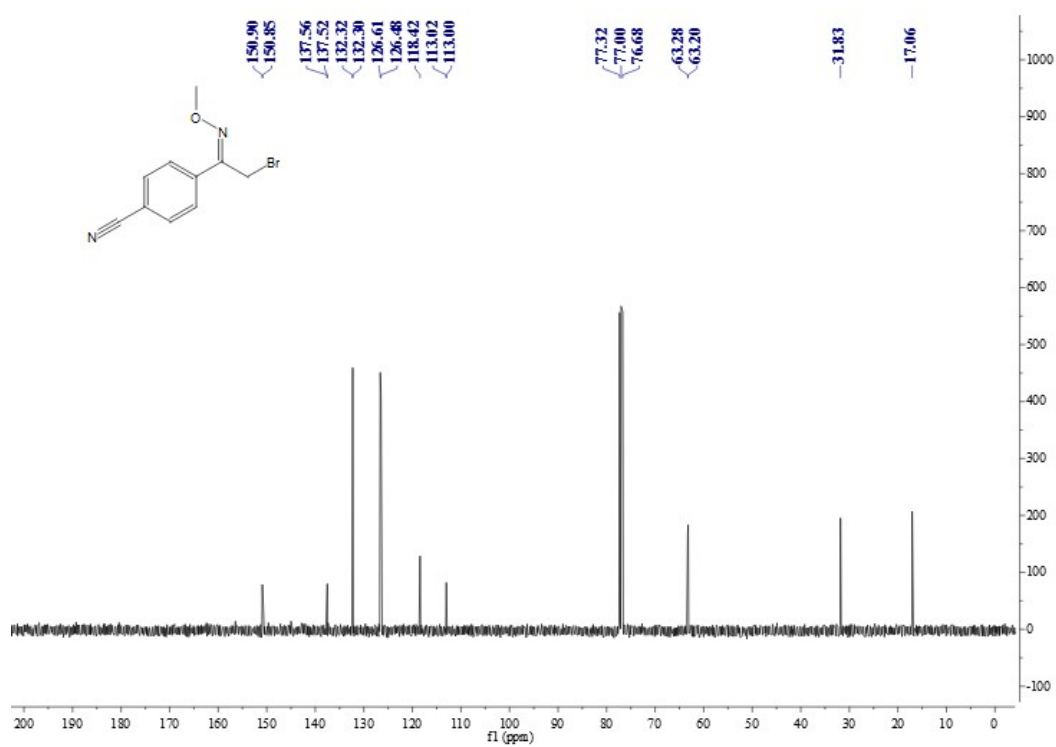

$^1\text{H}$  and  $^{13}\text{C}$  of **10**

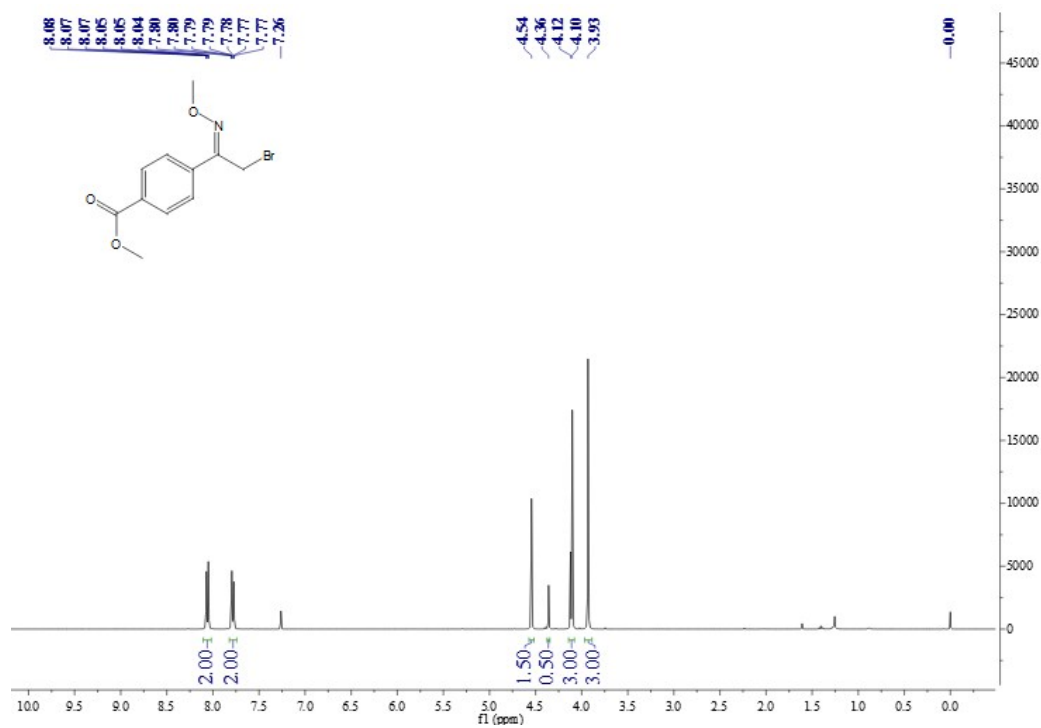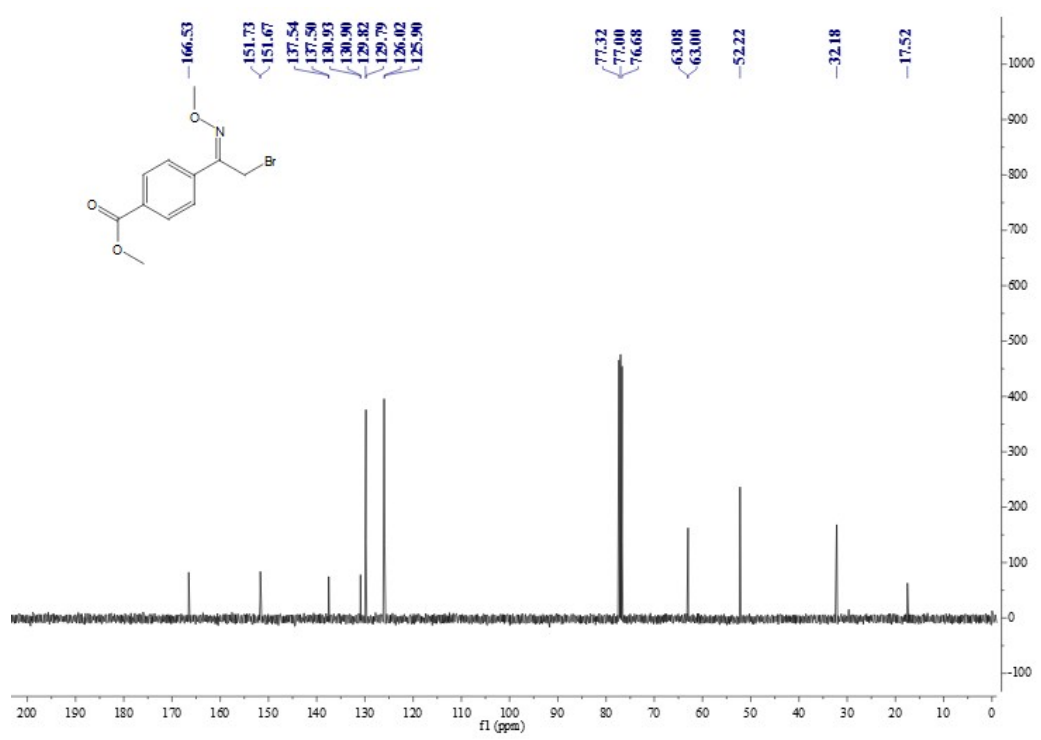



$^1\text{H}$  and  $^{13}\text{C}$  of **3a**

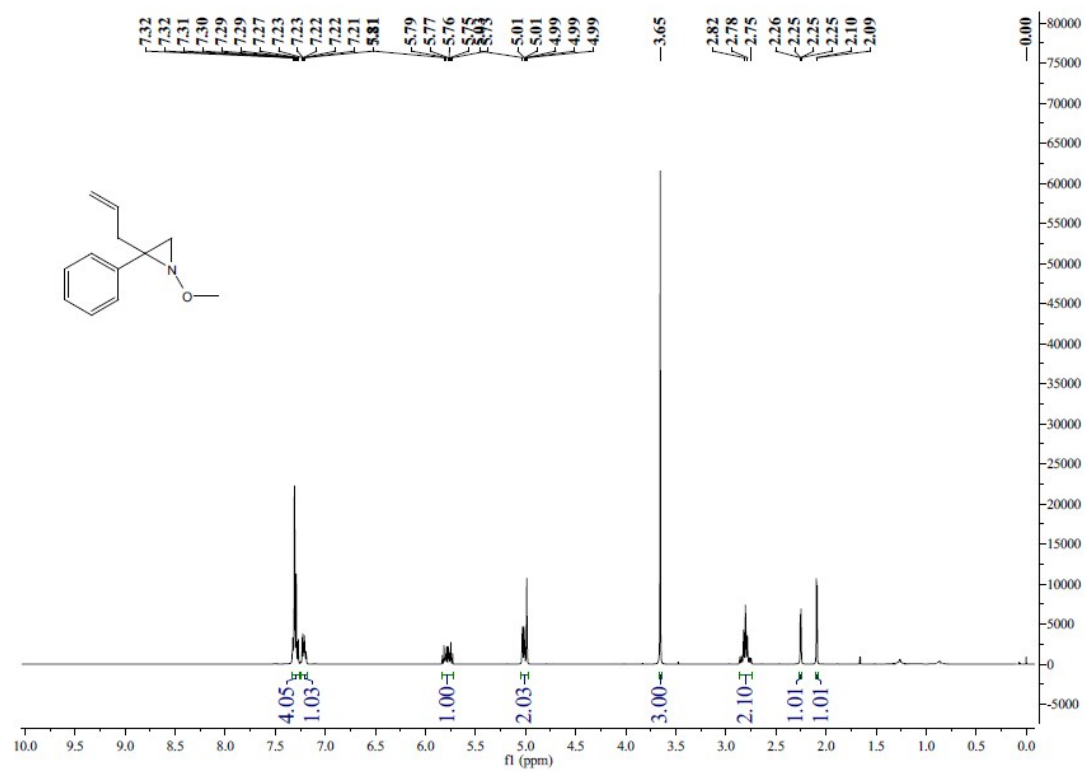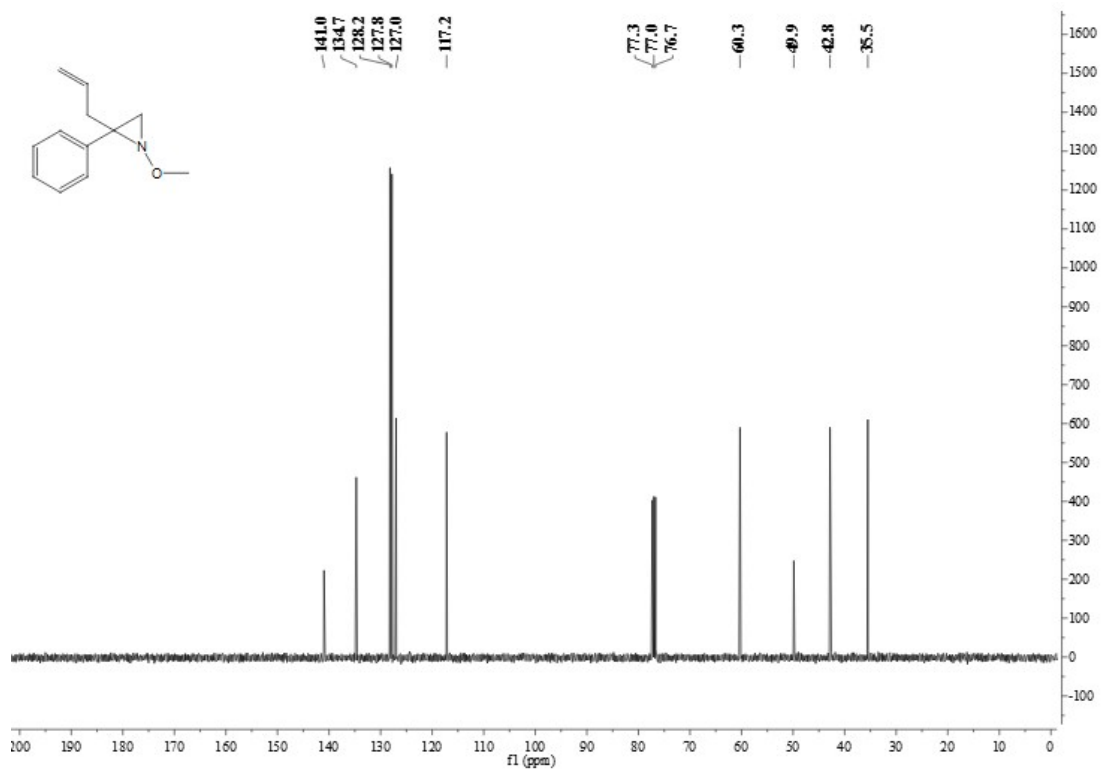

$^1\text{H}$  and  $^{13}\text{C}$  of **3b**

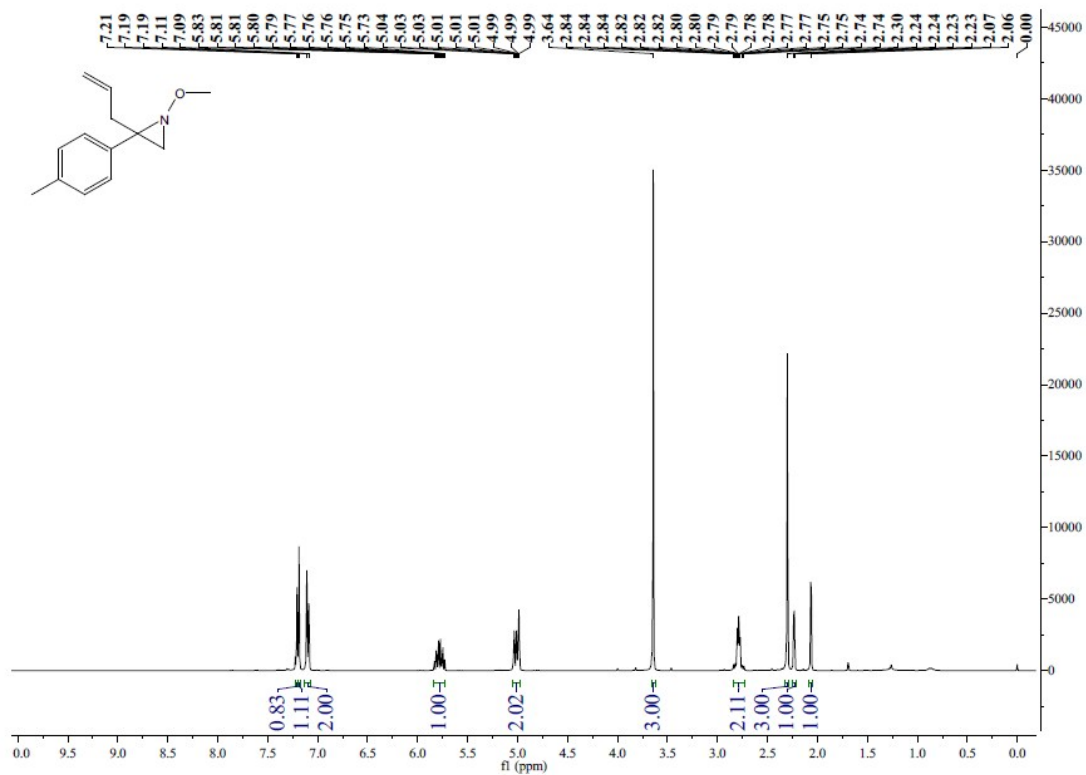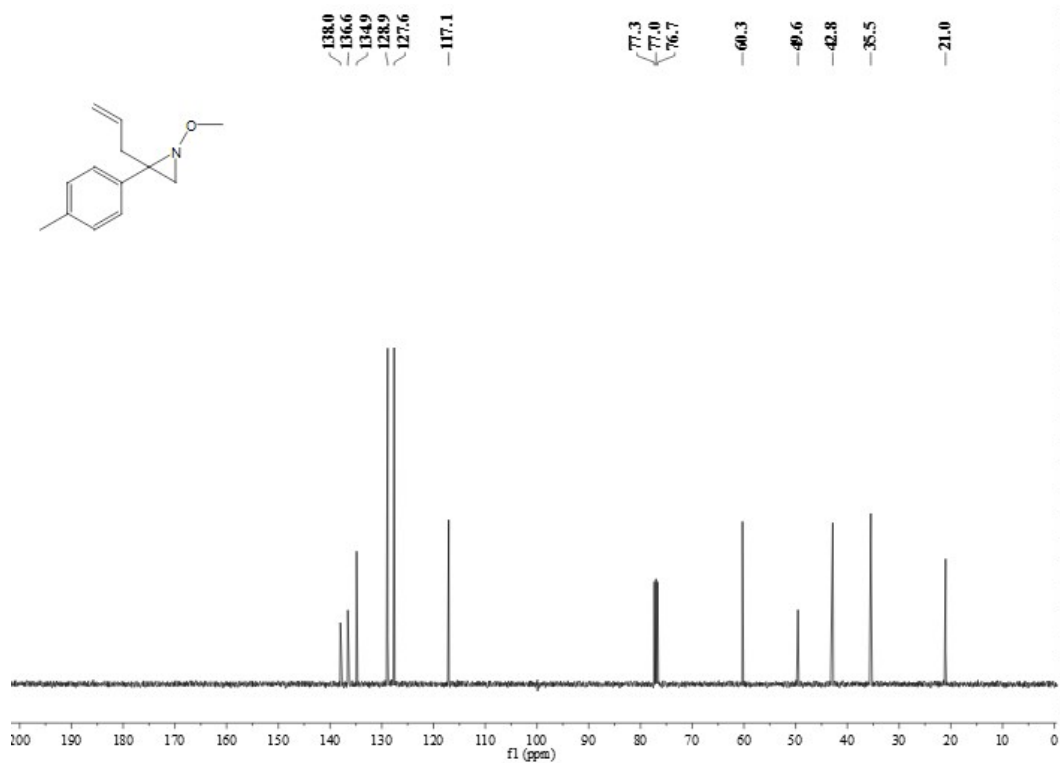

$^1\text{H}$  and  $^{13}\text{C}$  of **3c**

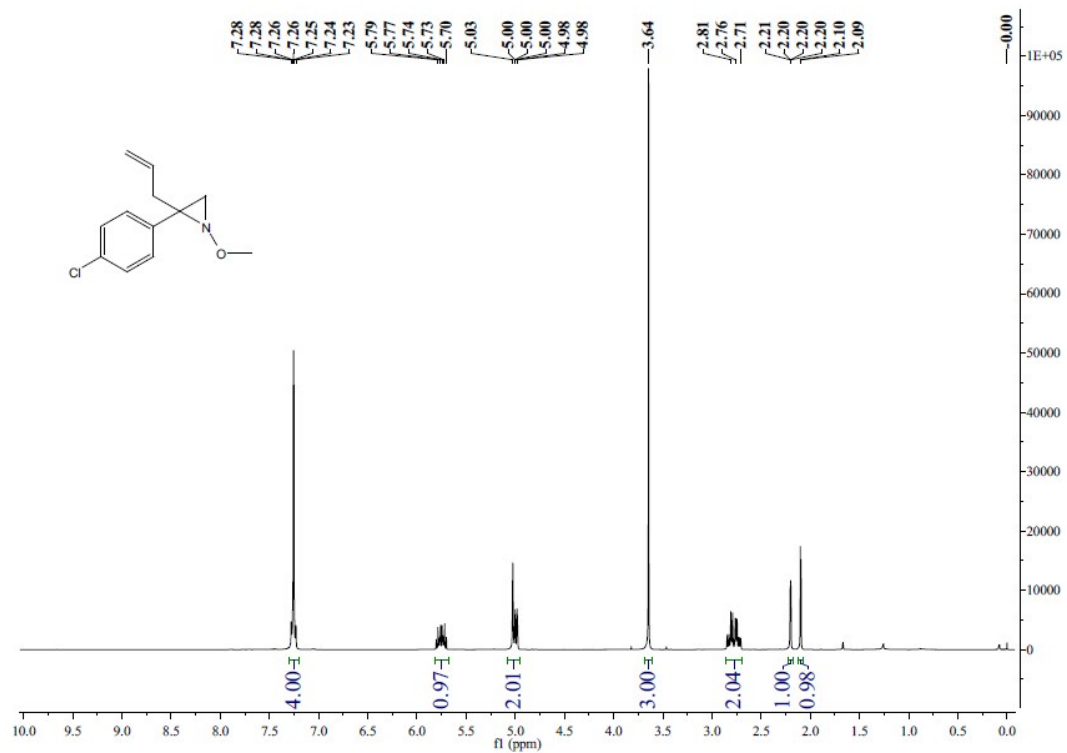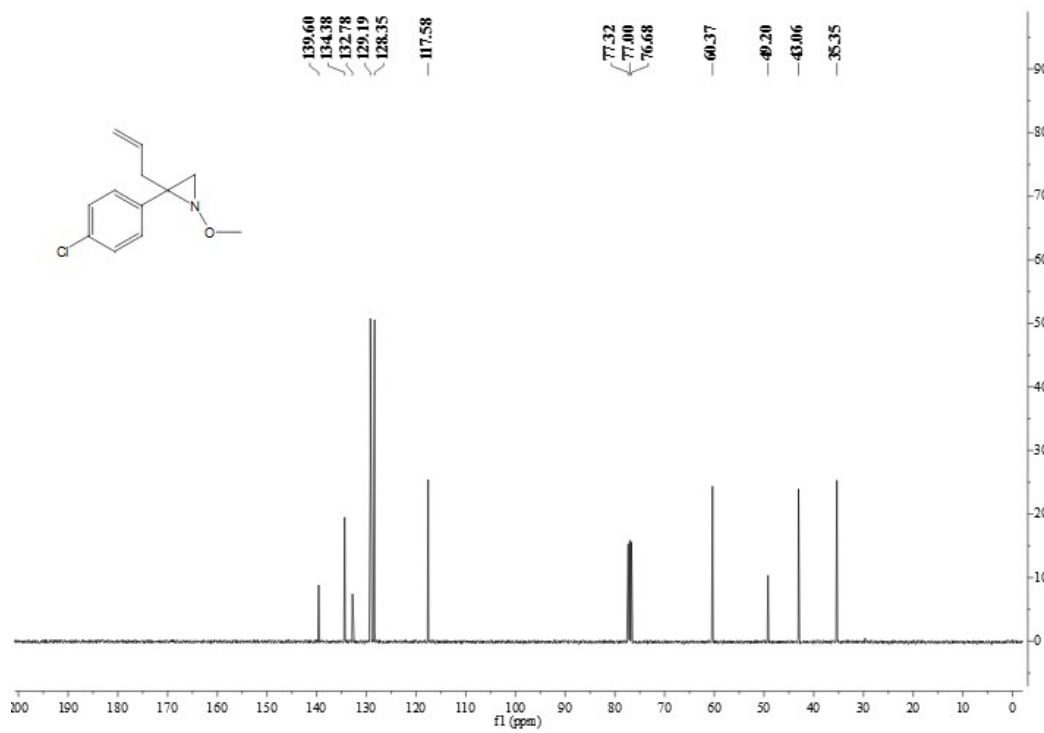

$^1\text{H}$  and  $^{13}\text{C}$  of **3d**

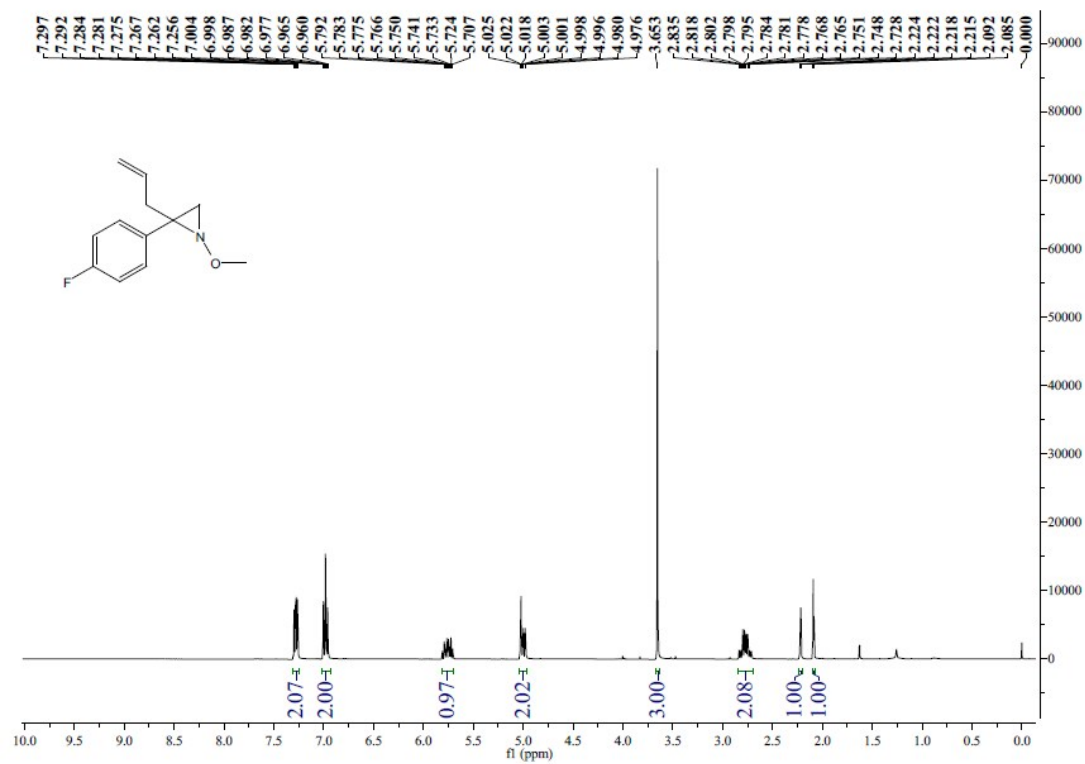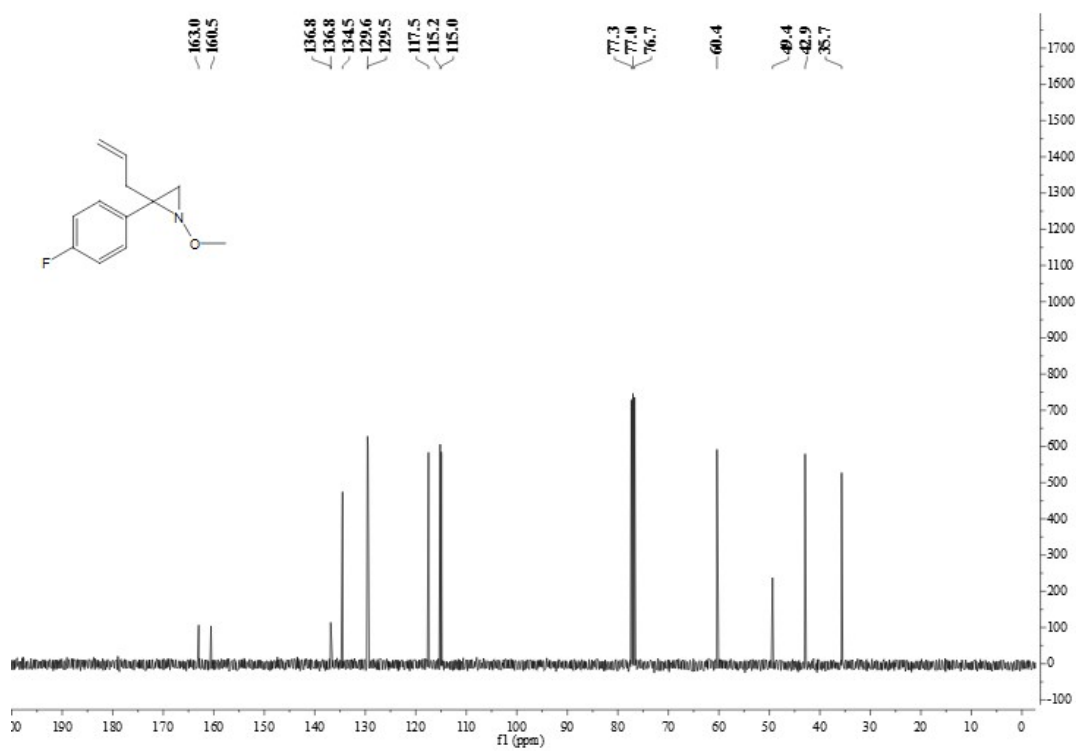

$^1\text{H}$  and  $^{13}\text{C}$  of **3e**

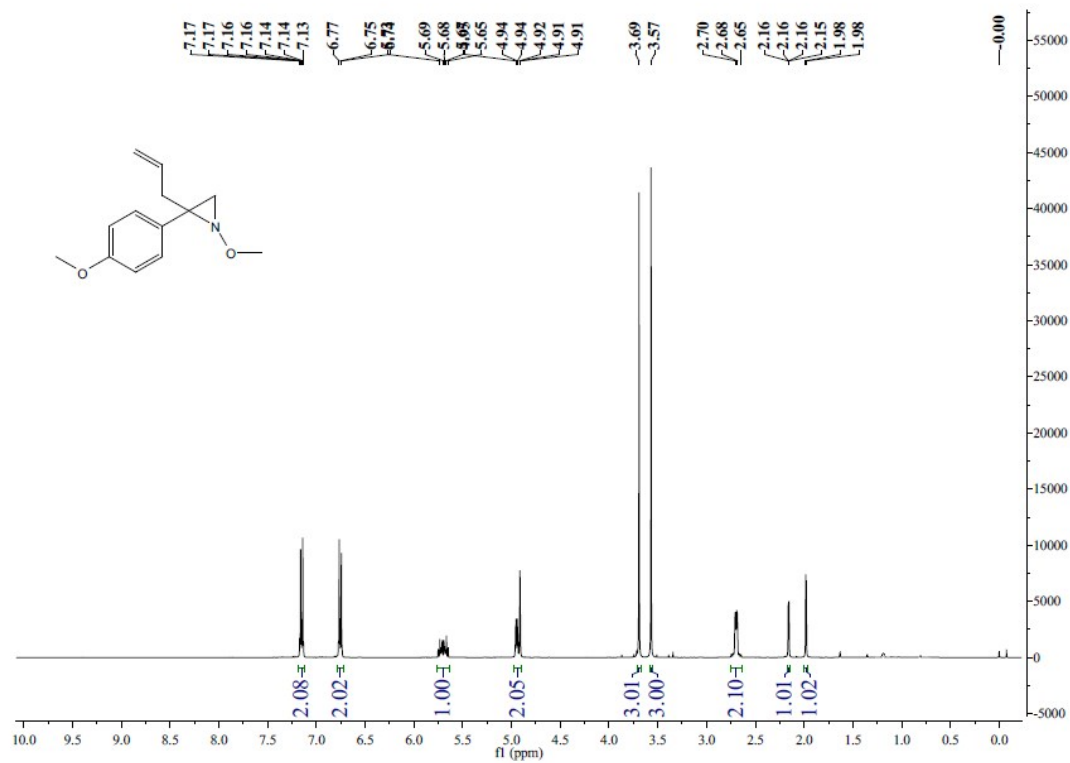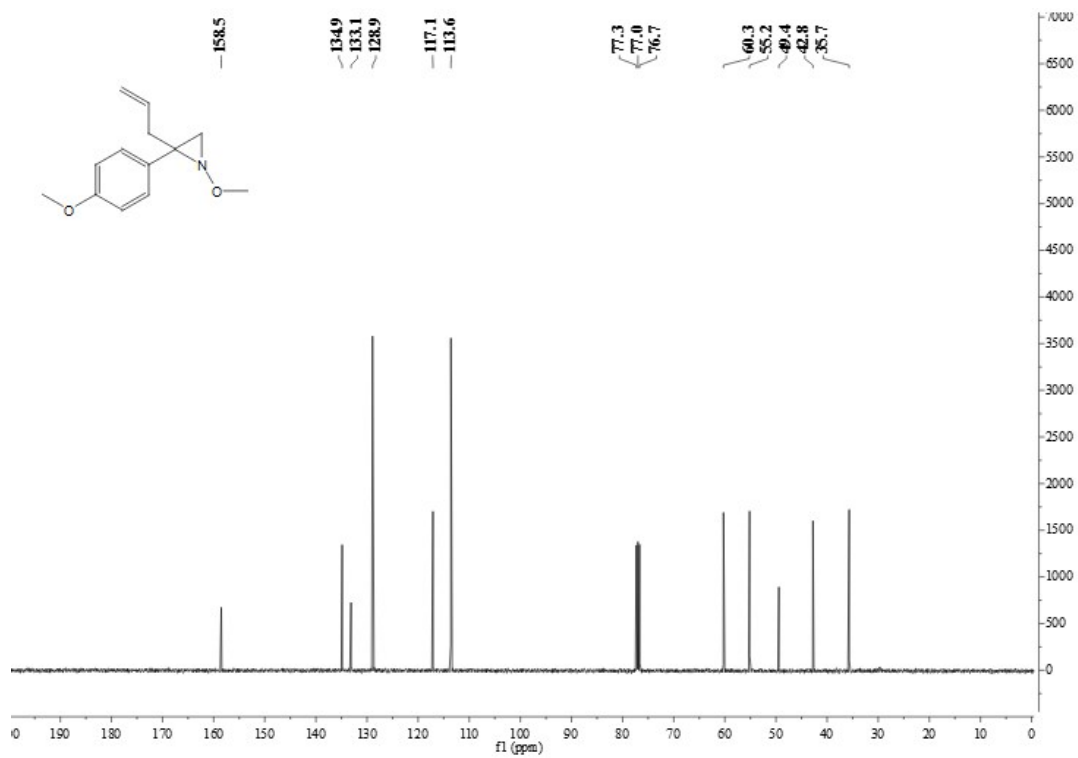

$^1\text{H}$  and  $^{13}\text{C}$  of **3f**

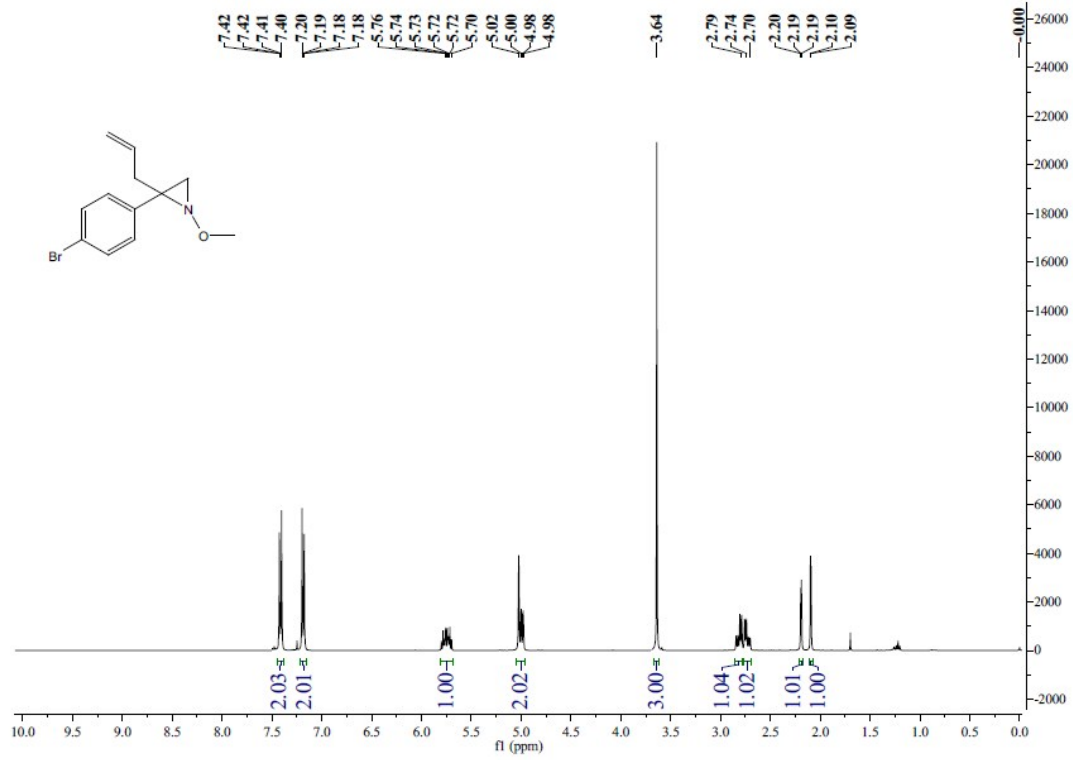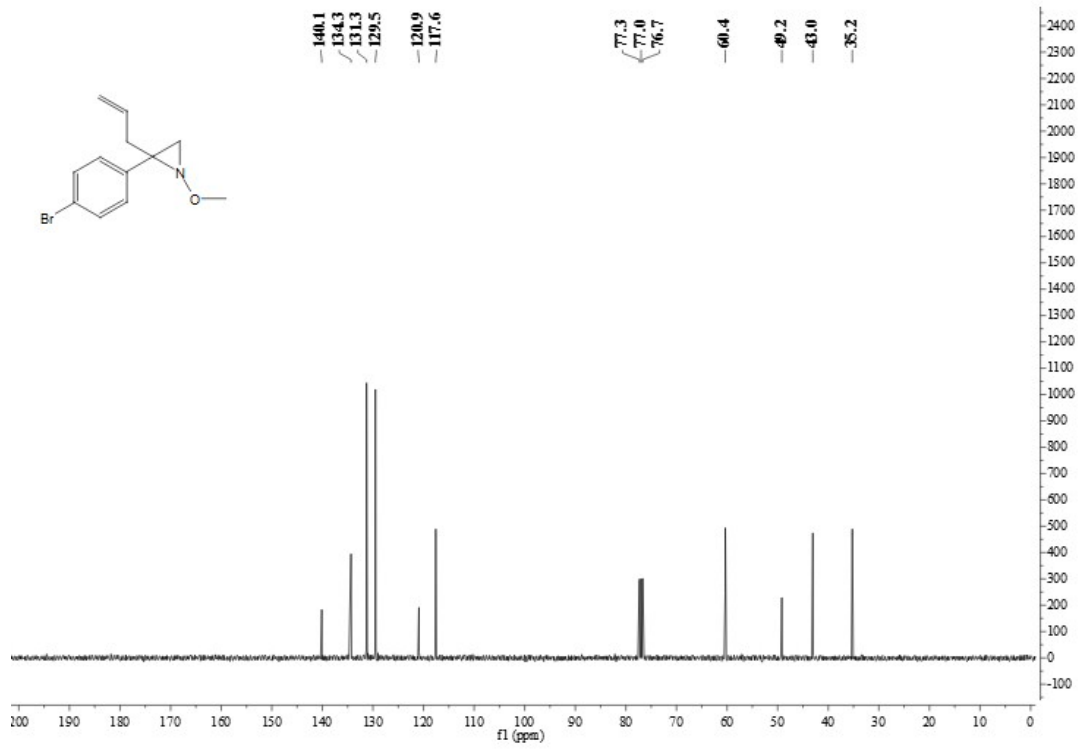

$^1\text{H}$  and  $^{13}\text{C}$  of **3g**

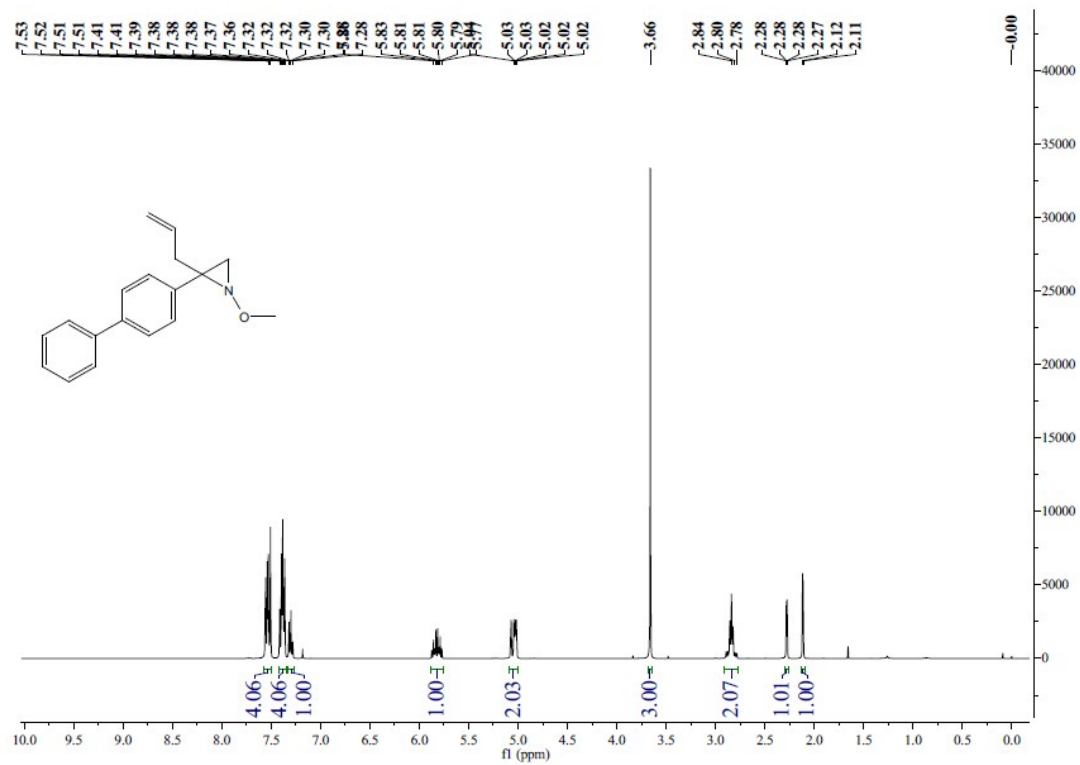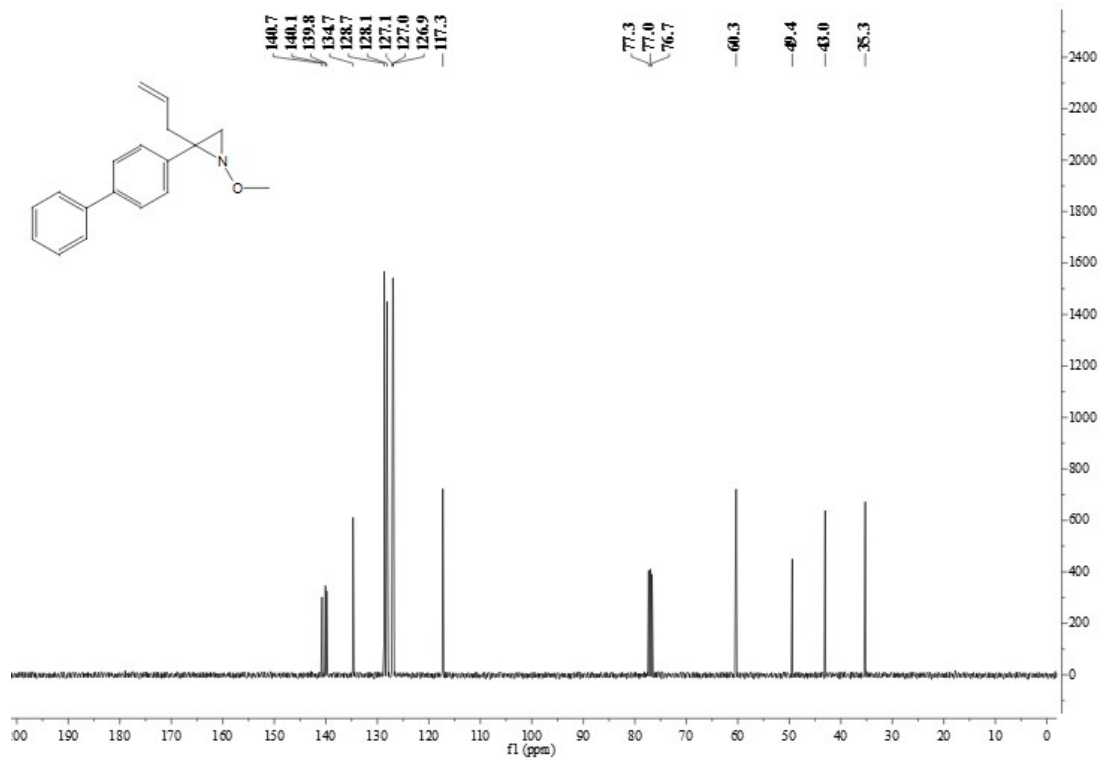

$^1\text{H}$  and  $^{13}\text{C}$  of **3h**

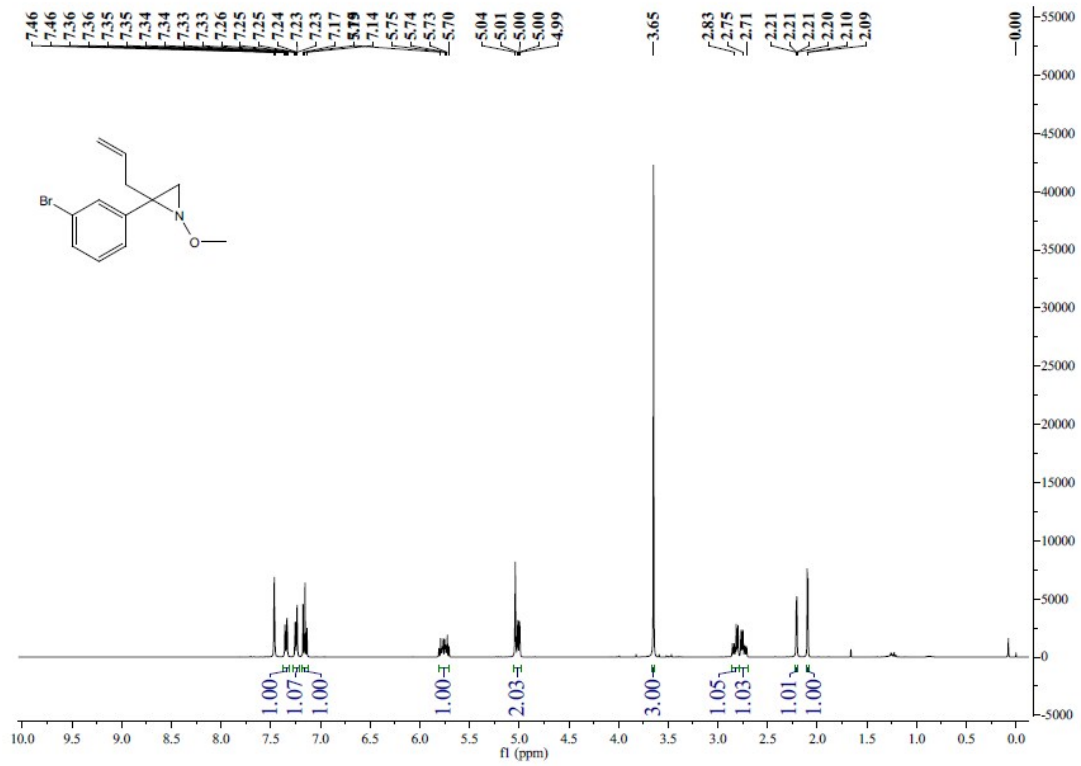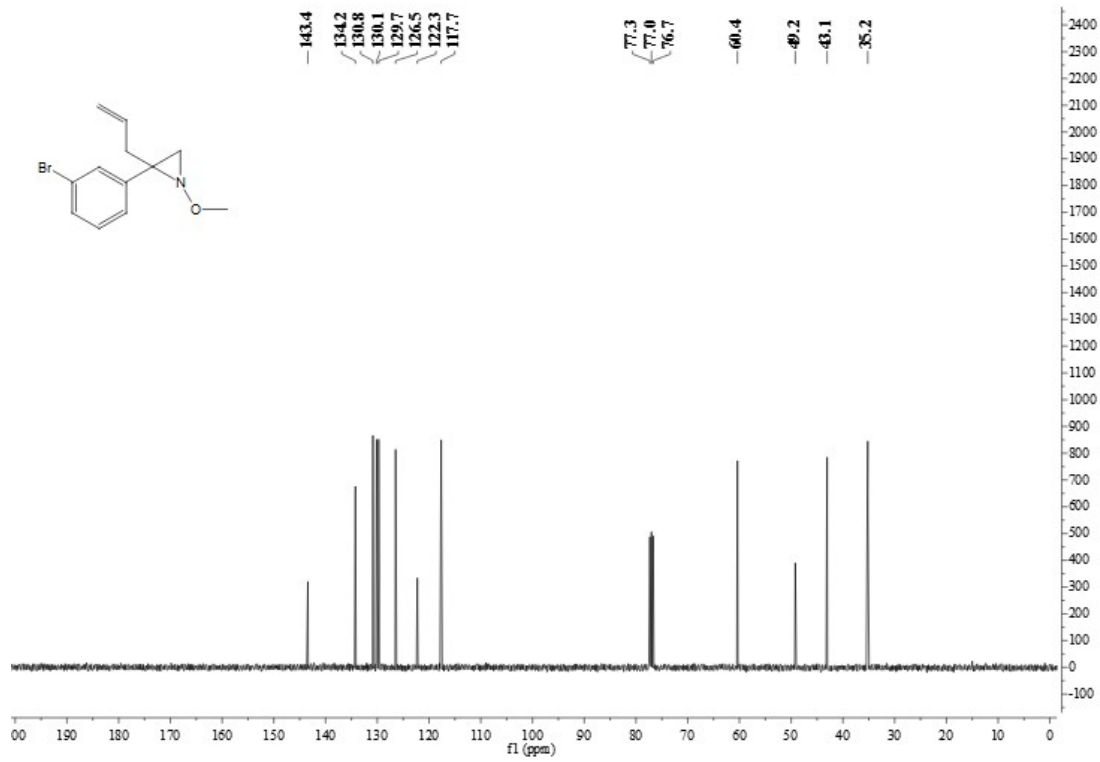



$^1\text{H}$  and  $^{13}\text{C}$  of **3i**

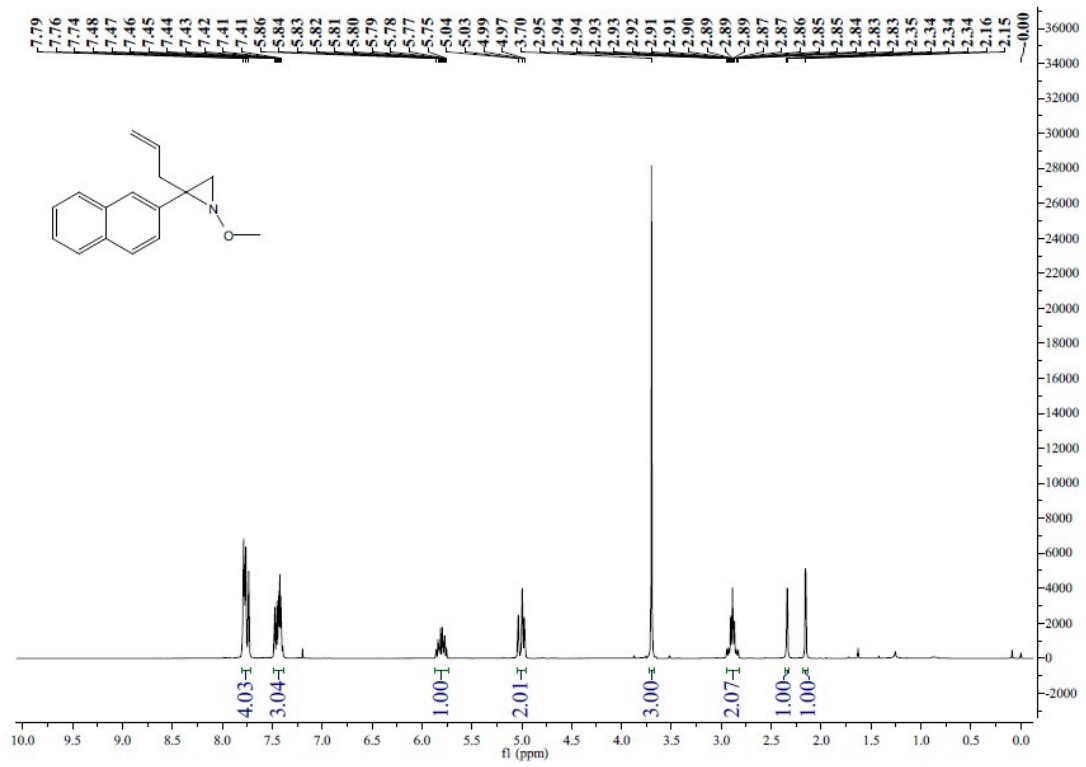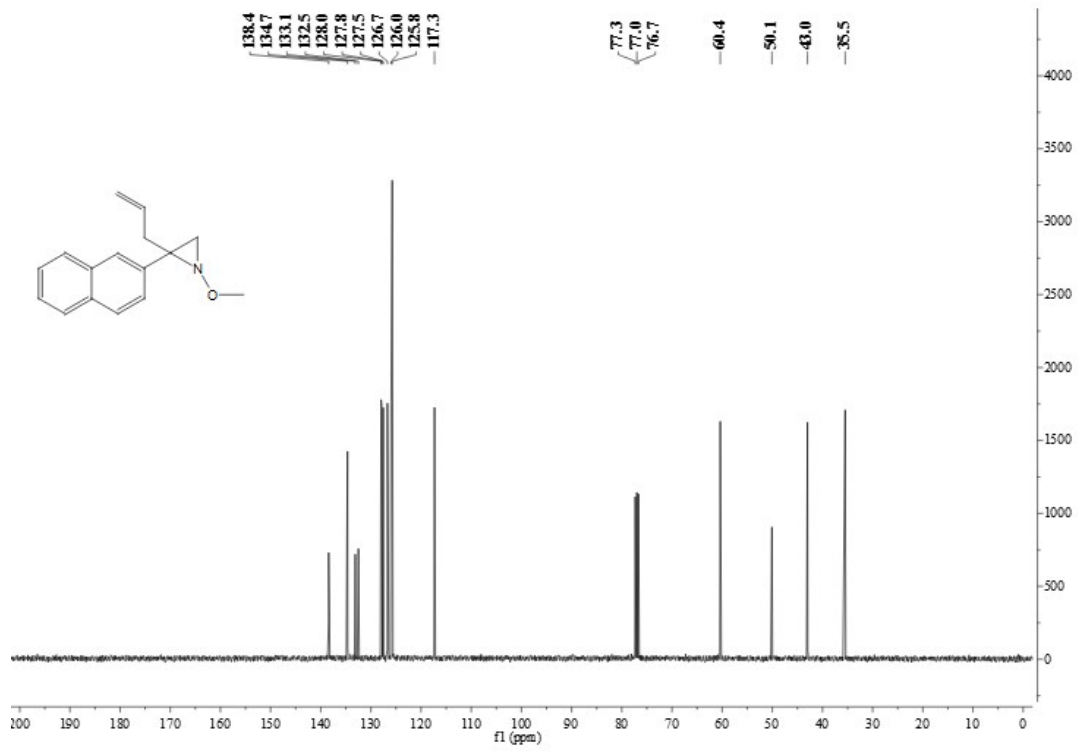

$^1\text{H}$  and  $^{13}\text{C}$  of **3j**

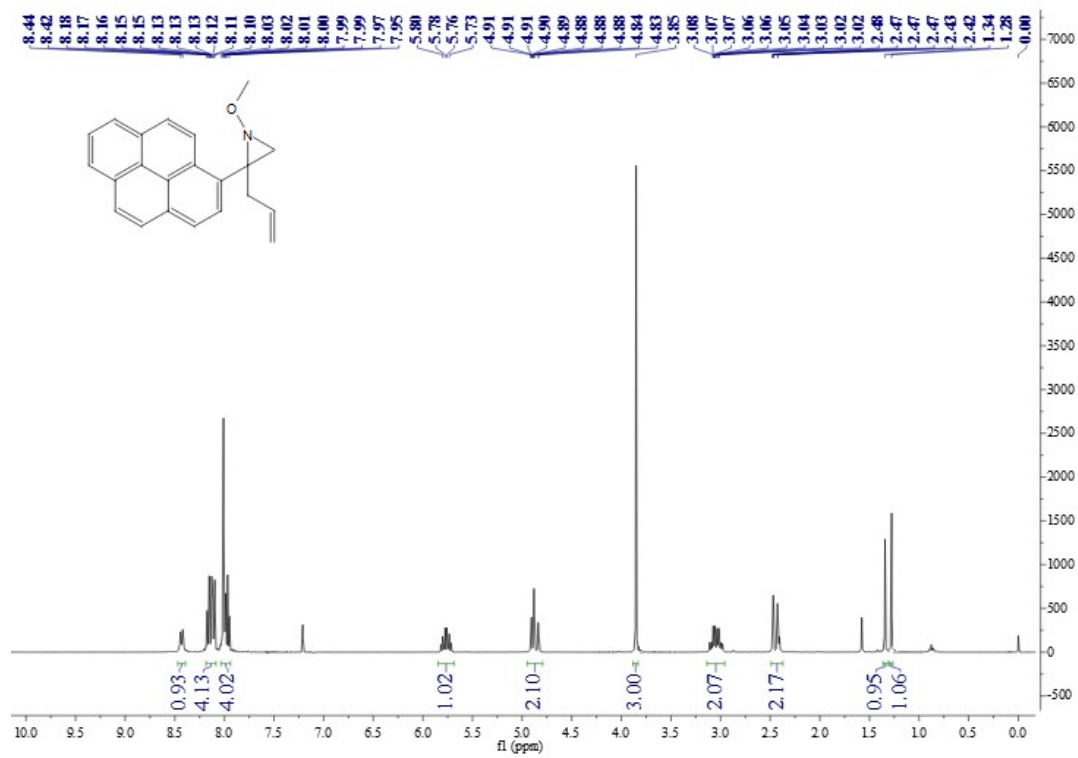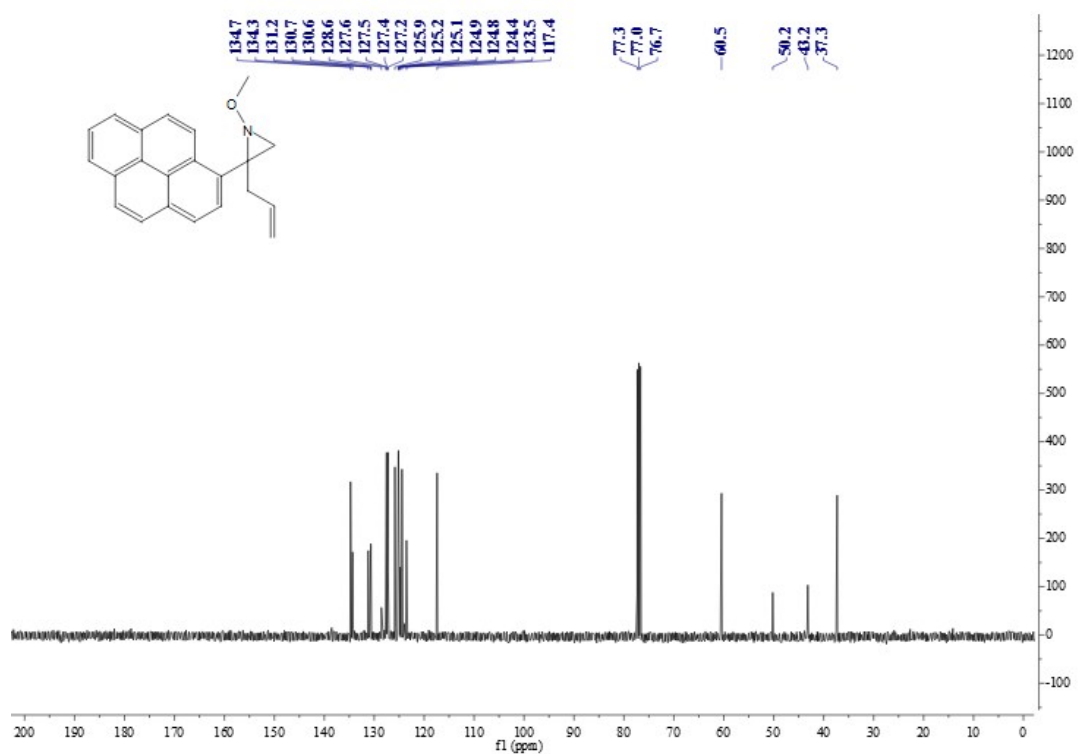

$^1\text{H}$  and  $^{13}\text{C}$  of **3k**

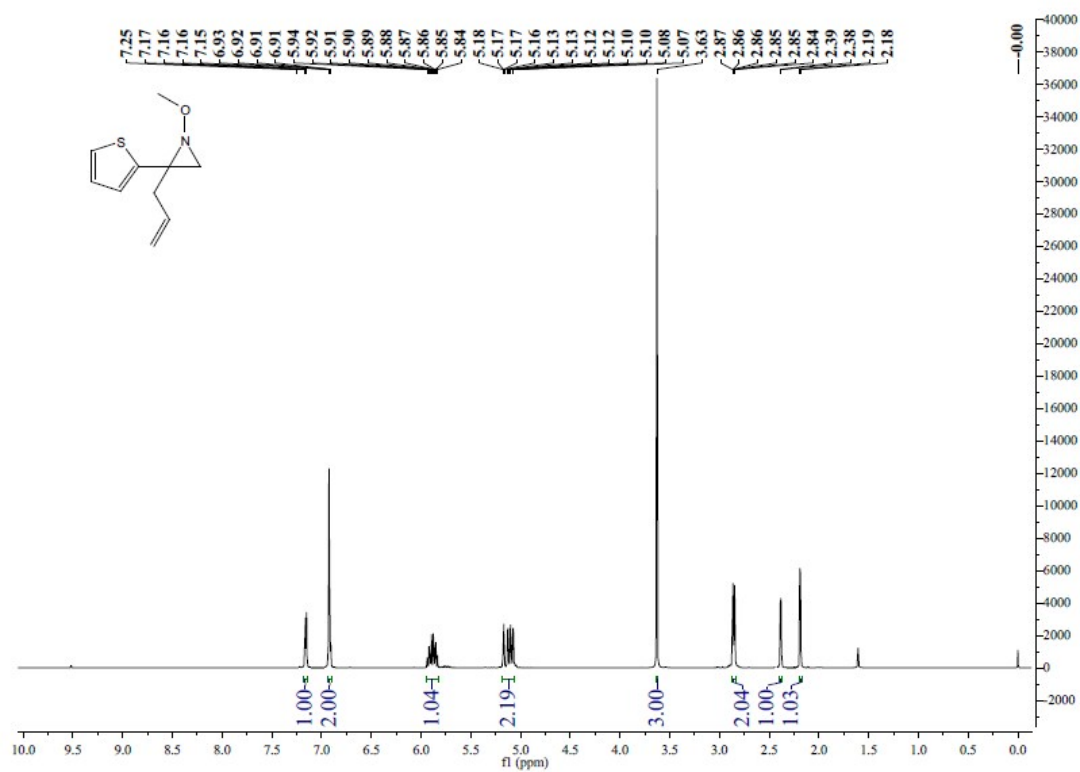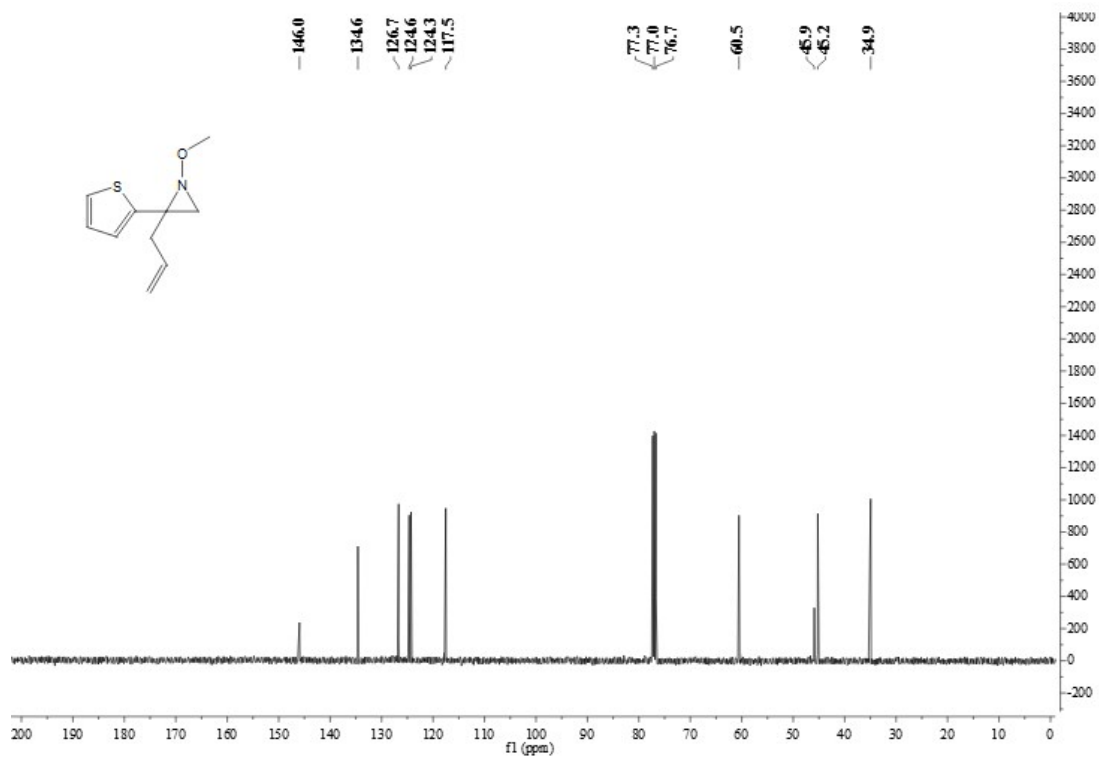

$^1\text{H}$  and  $^{13}\text{C}$  of **31**

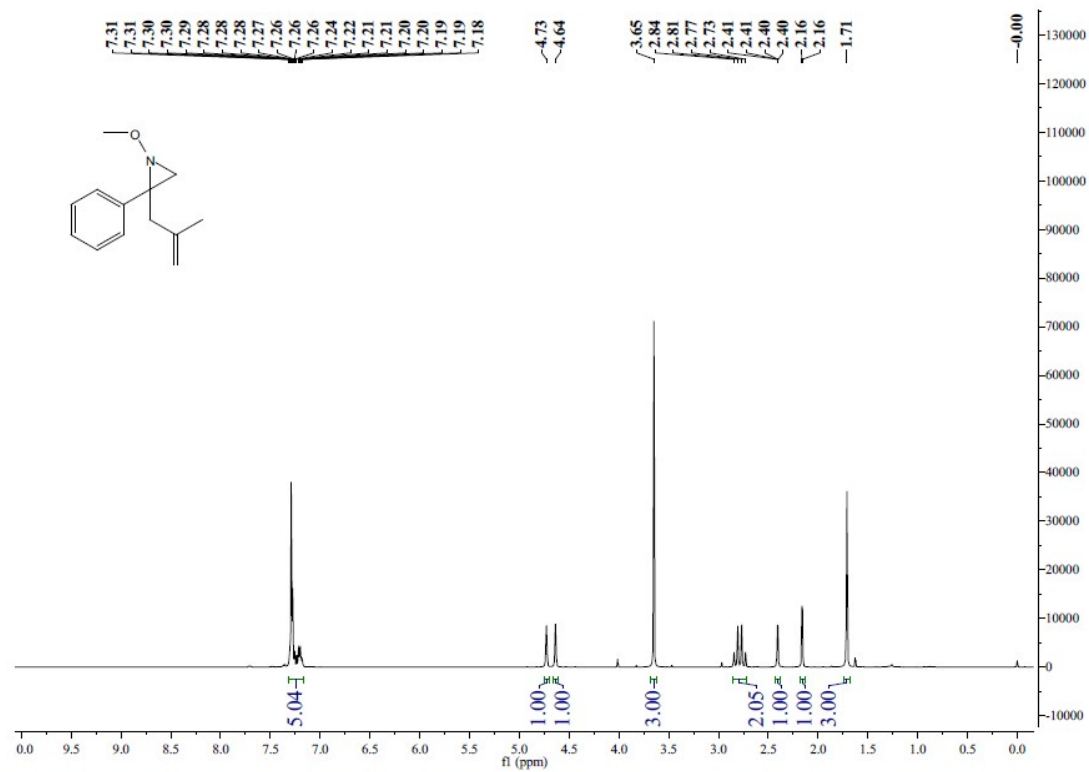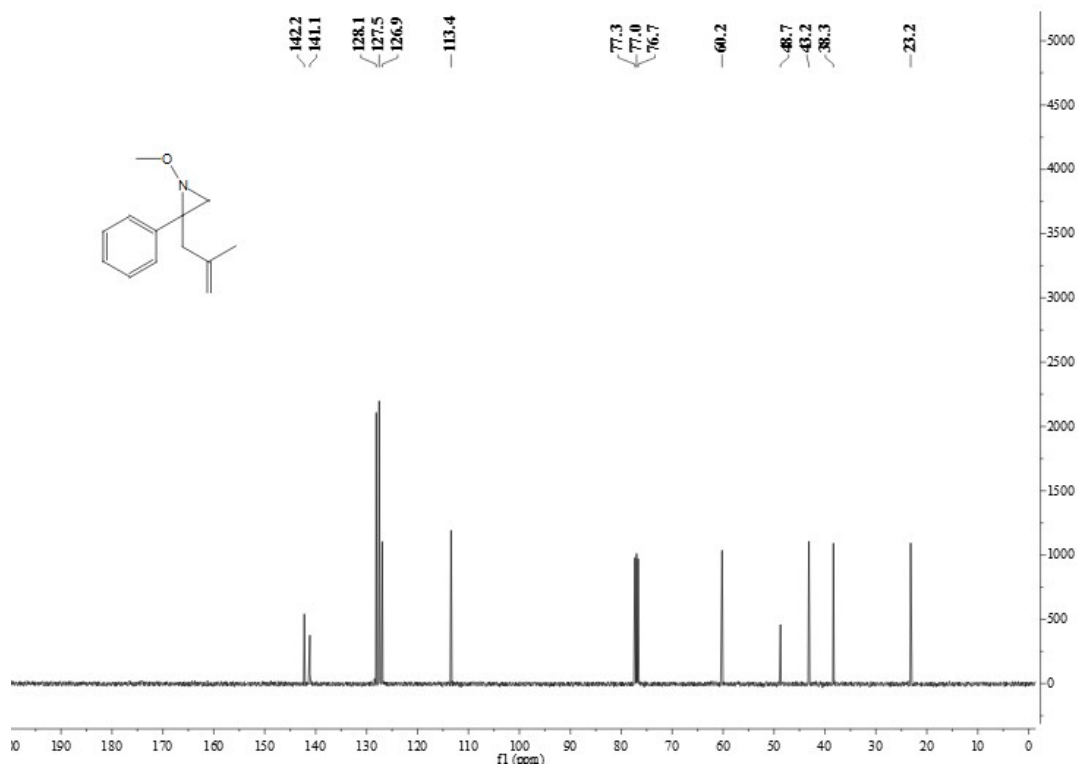

$^1\text{H}$  and  $^{13}\text{C}$  of **3m**

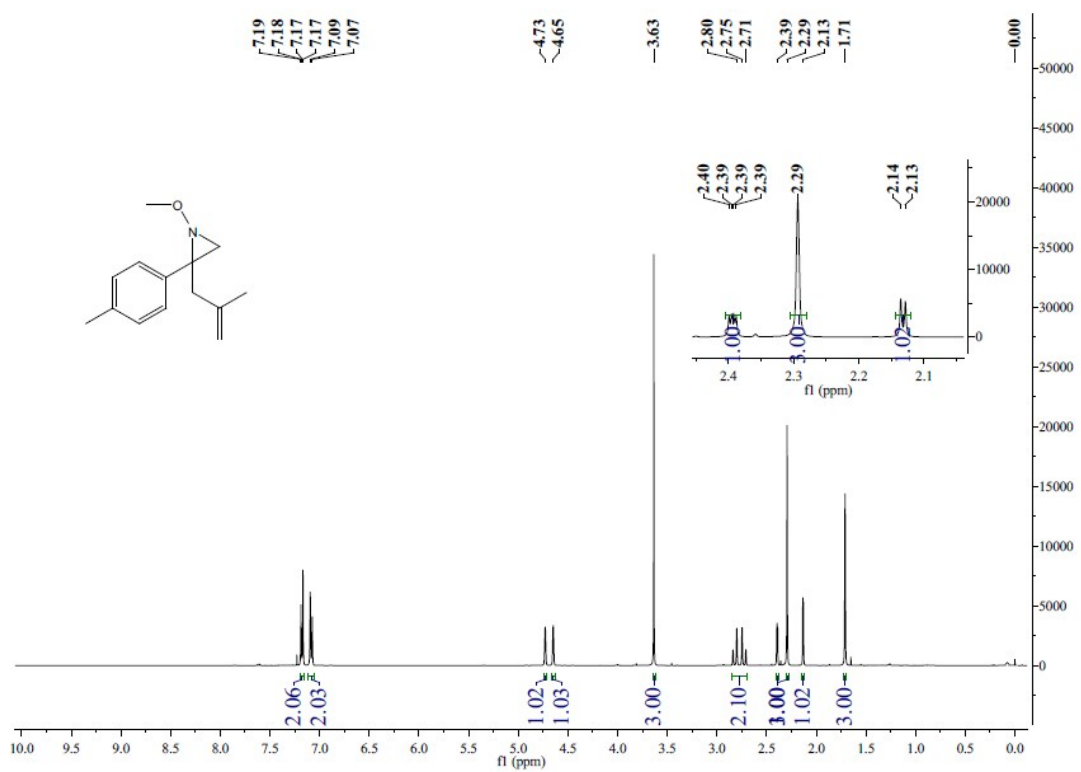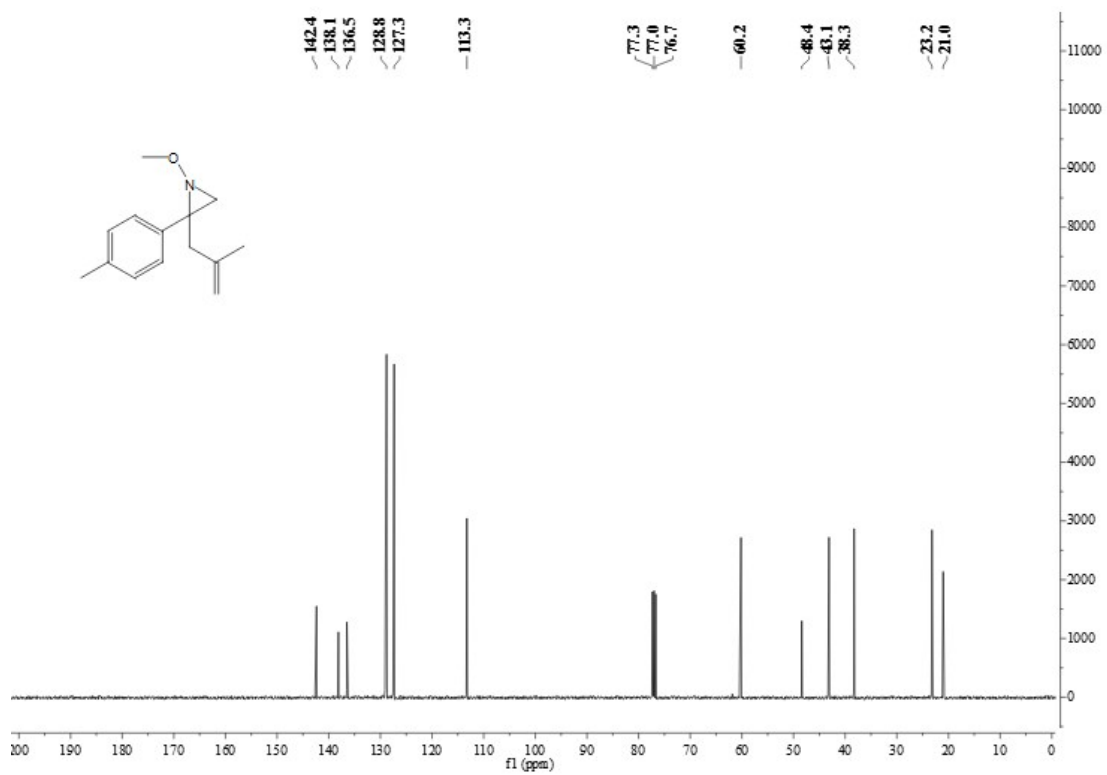

$^1\text{H}$  and  $^{13}\text{C}$  of **3n**

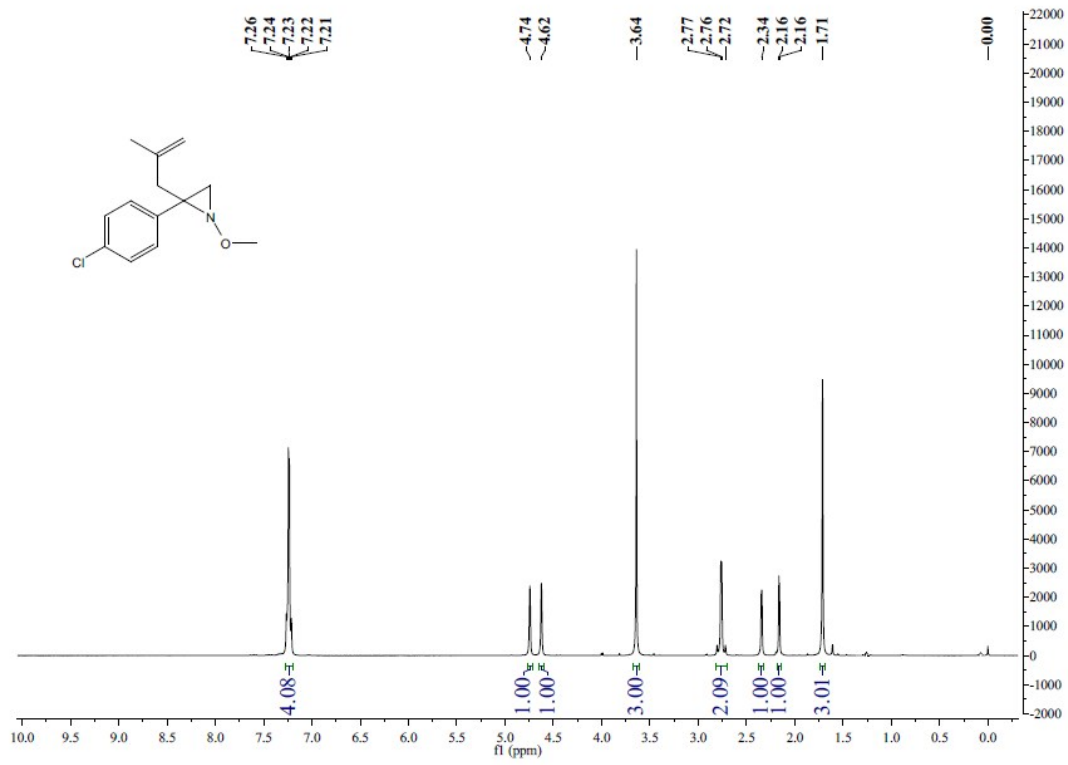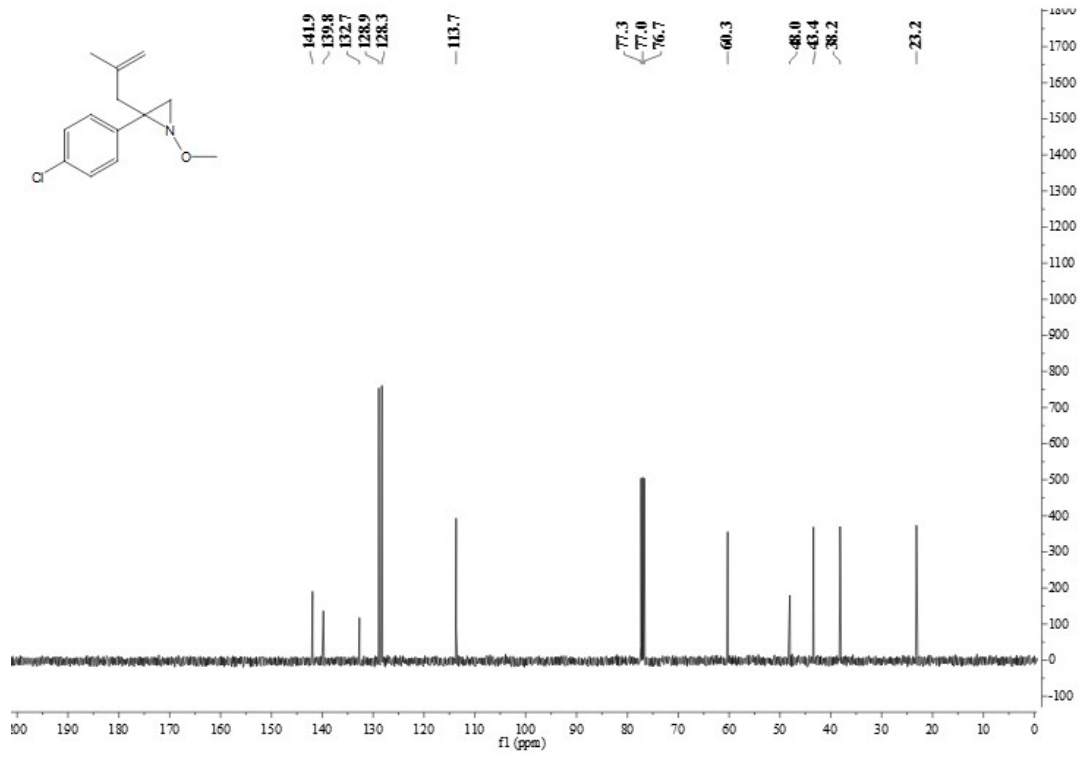

$^1\text{H}$  and  $^{13}\text{C}$  of **3o**

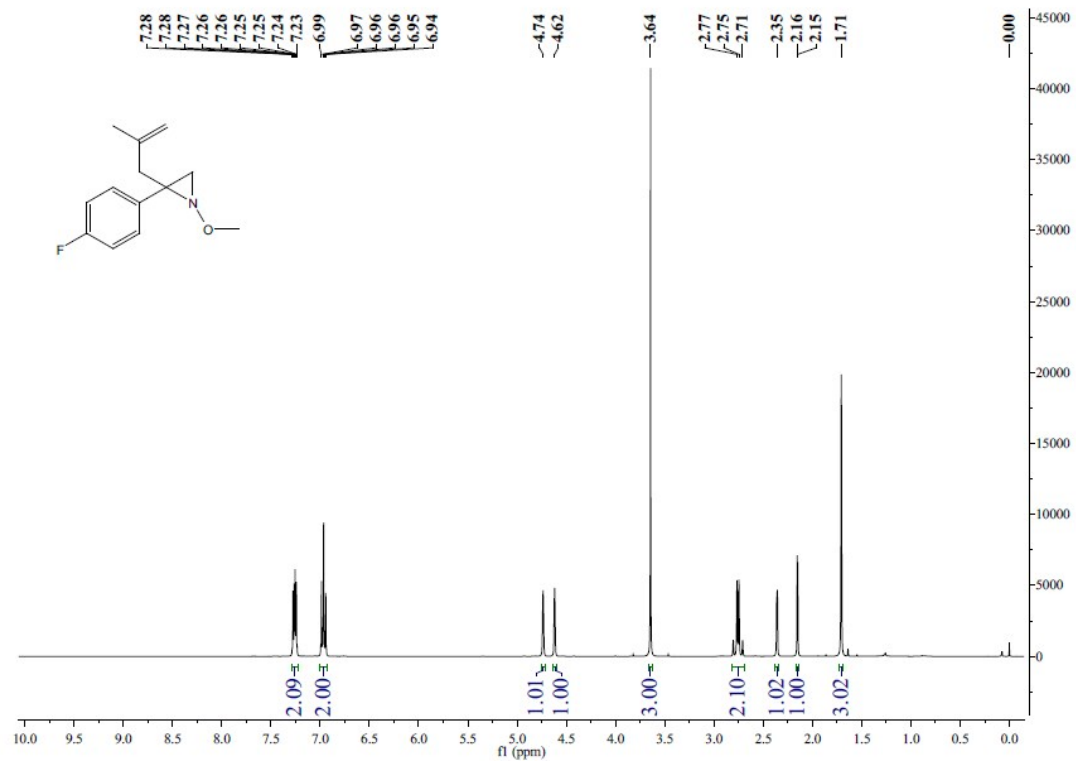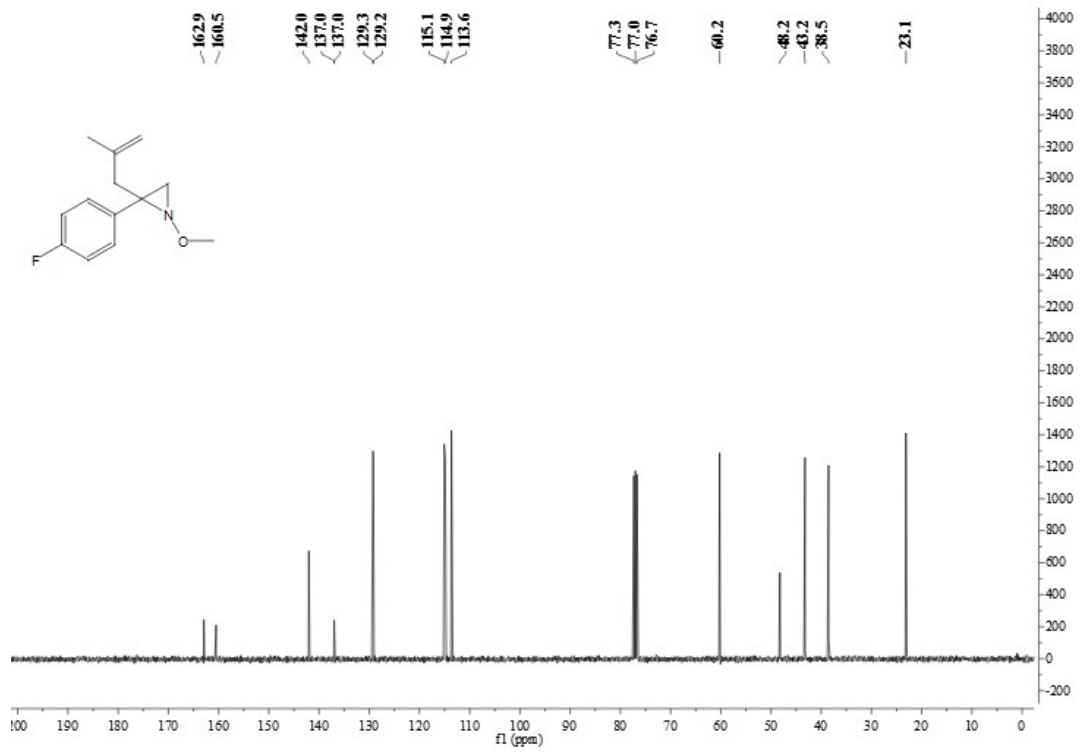

$^1\text{H}$  and  $^{13}\text{C}$  of **3p**

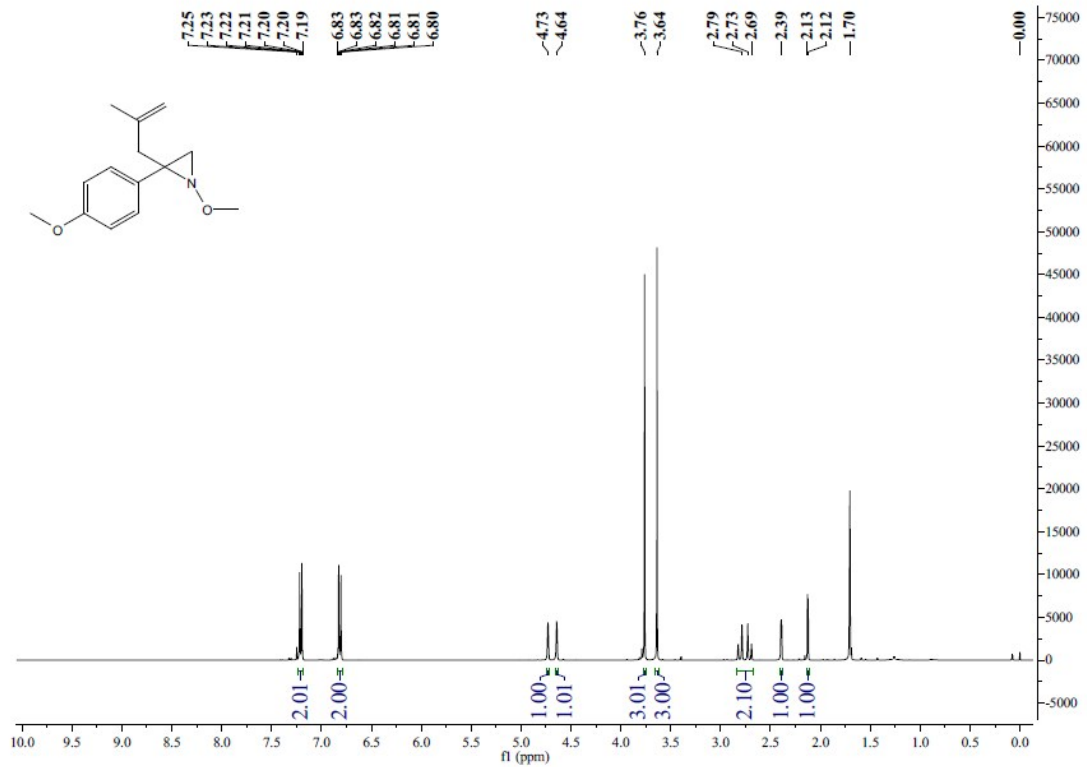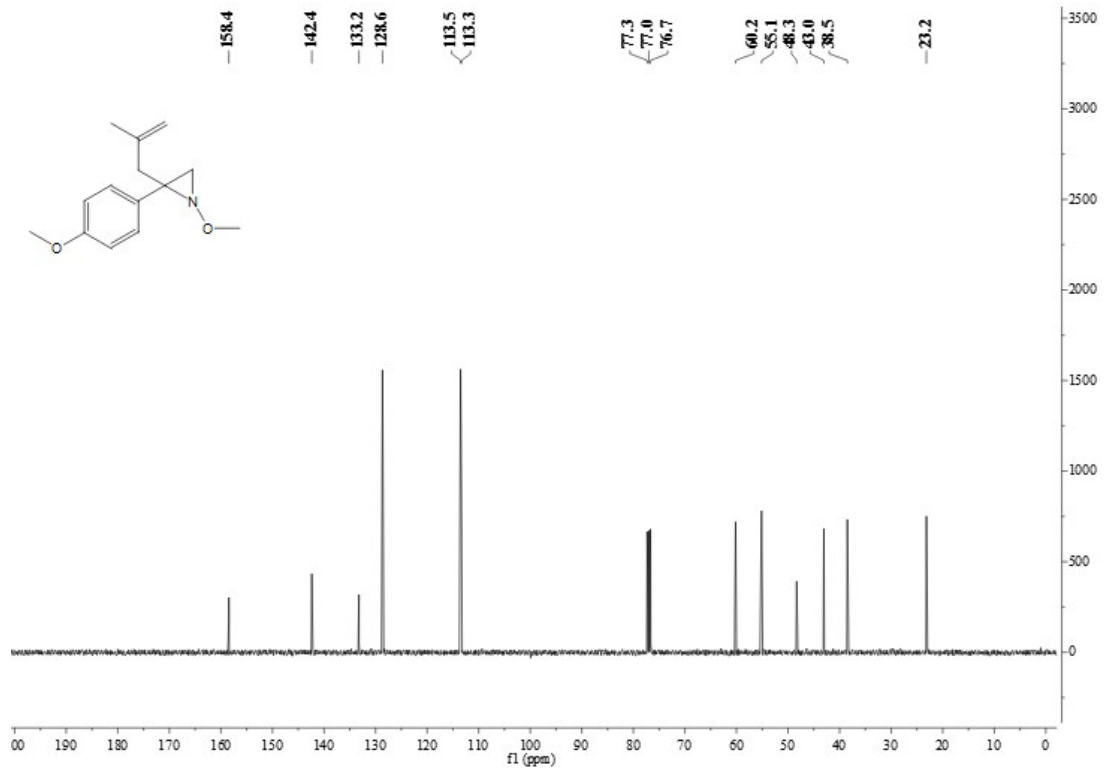



$^1\text{H}$  and  $^{13}\text{C}$  of **3q**

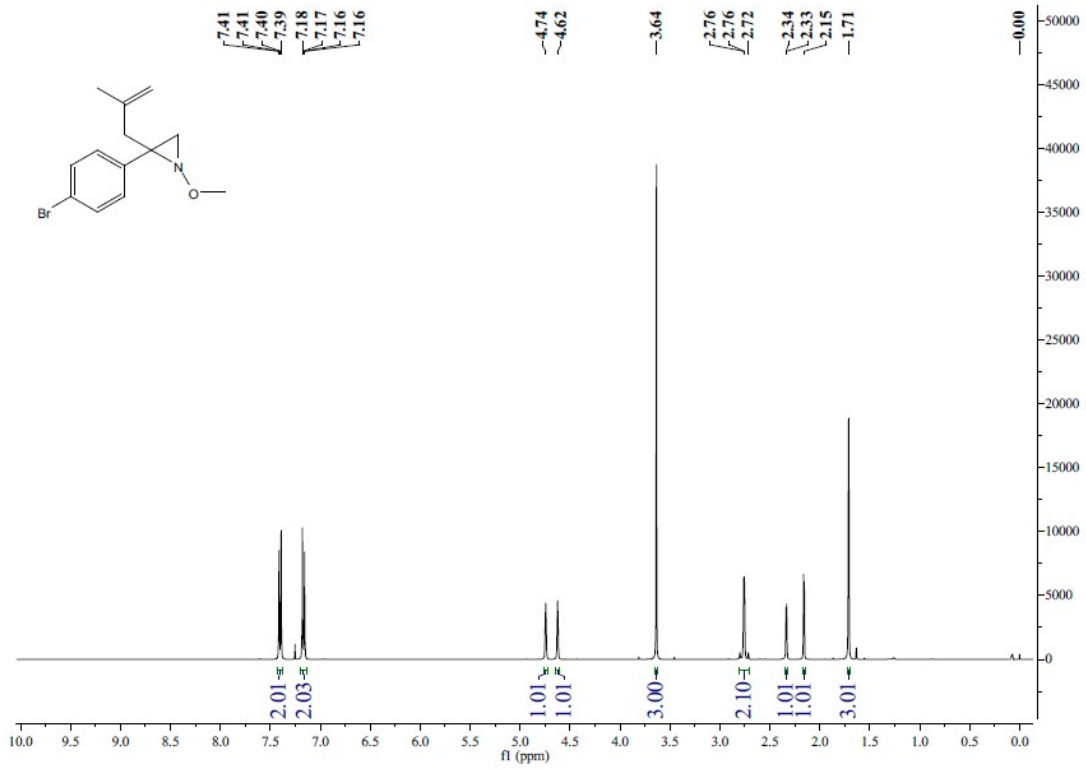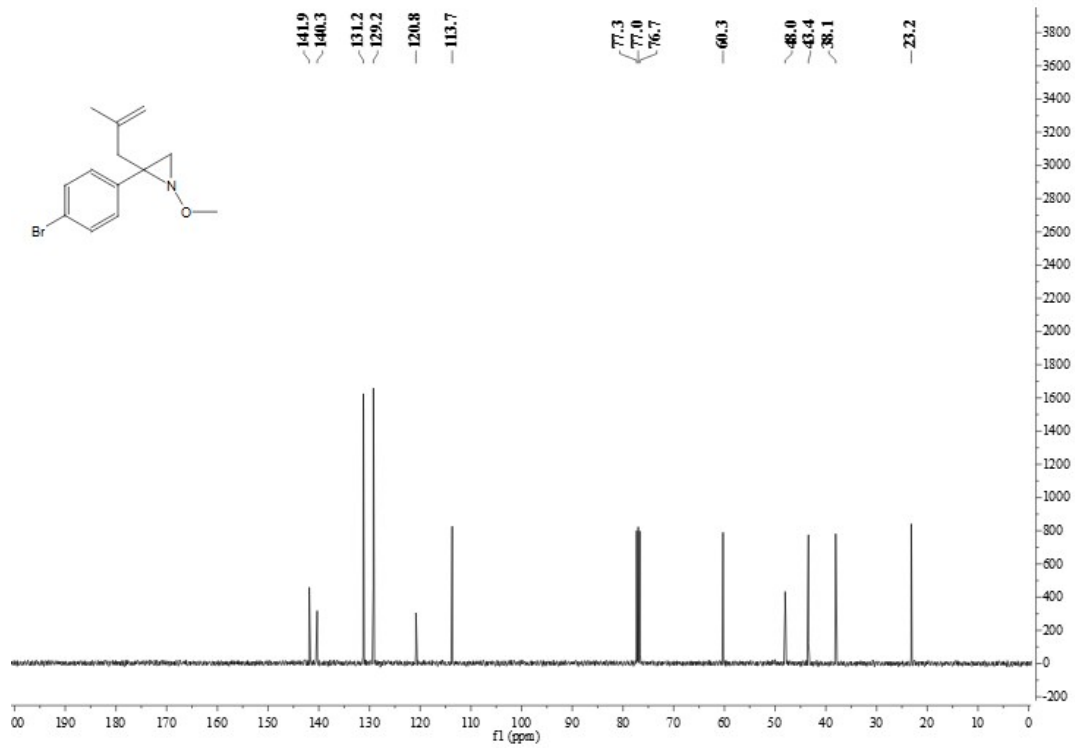

$^1\text{H}$  and  $^{13}\text{C}$  of **3r**

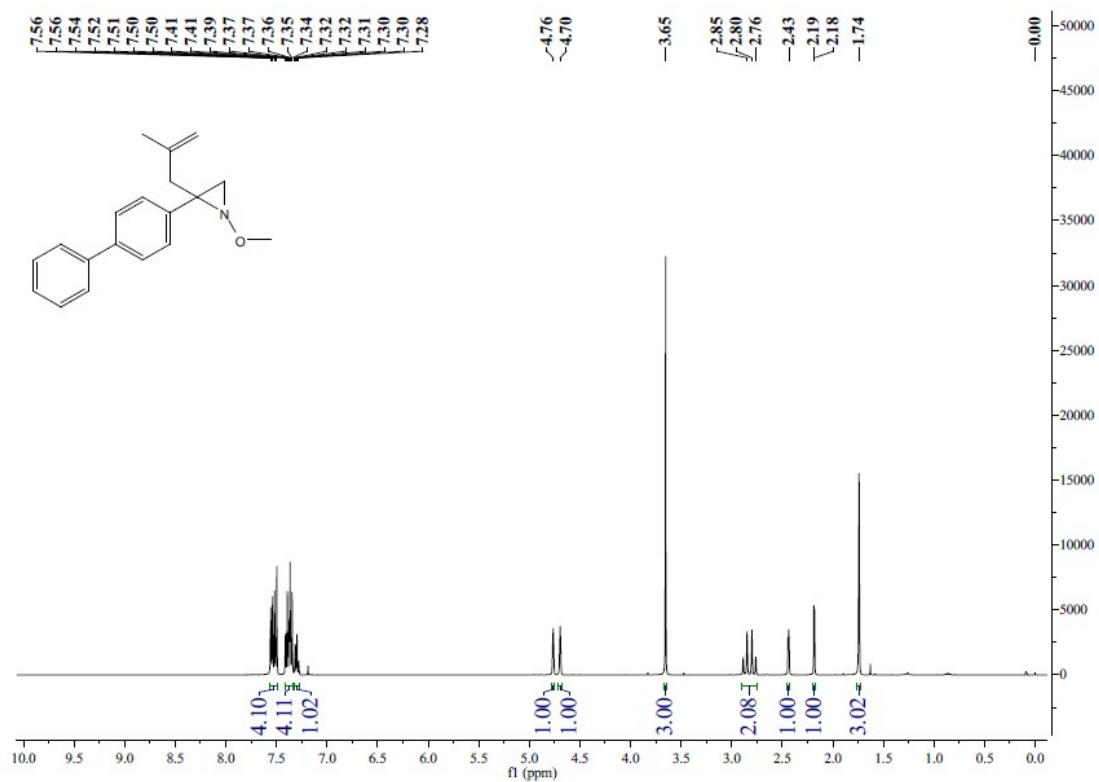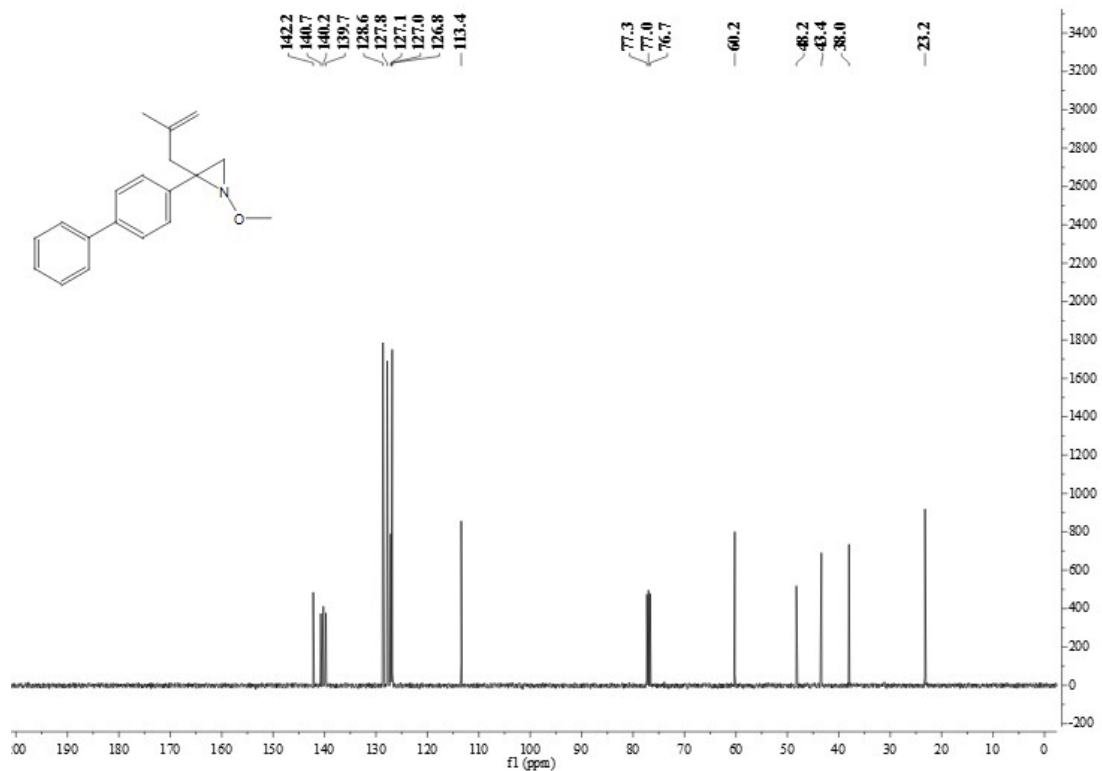

$^1\text{H}$  and  $^{13}\text{C}$  of **3s**

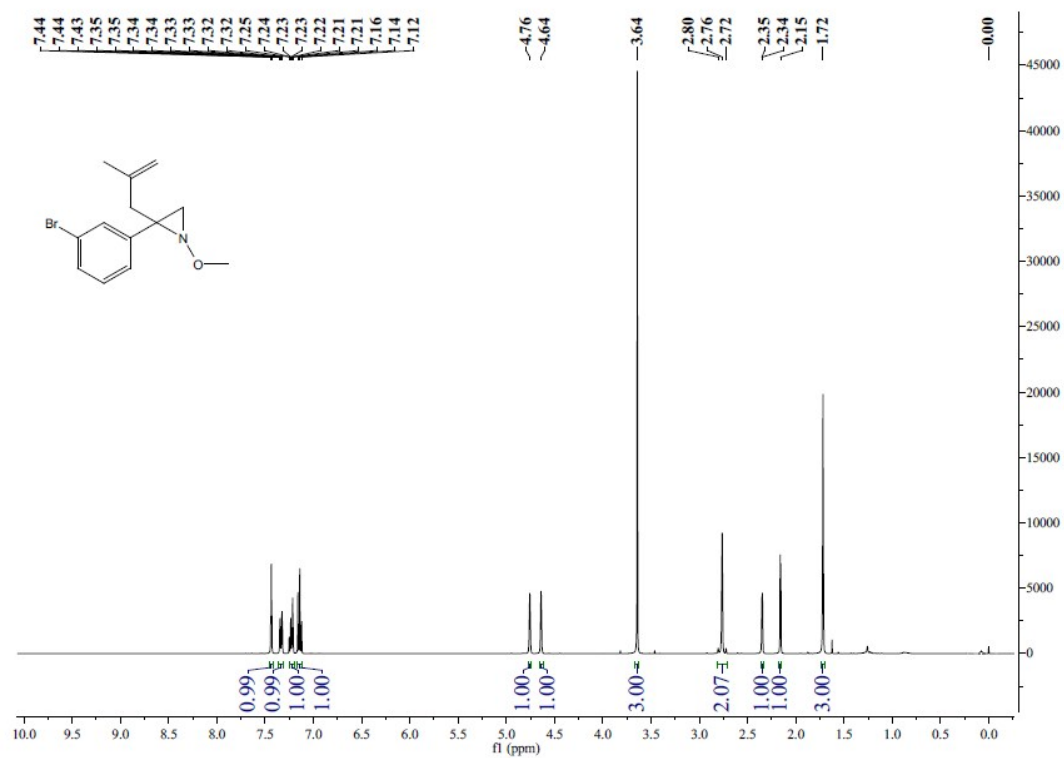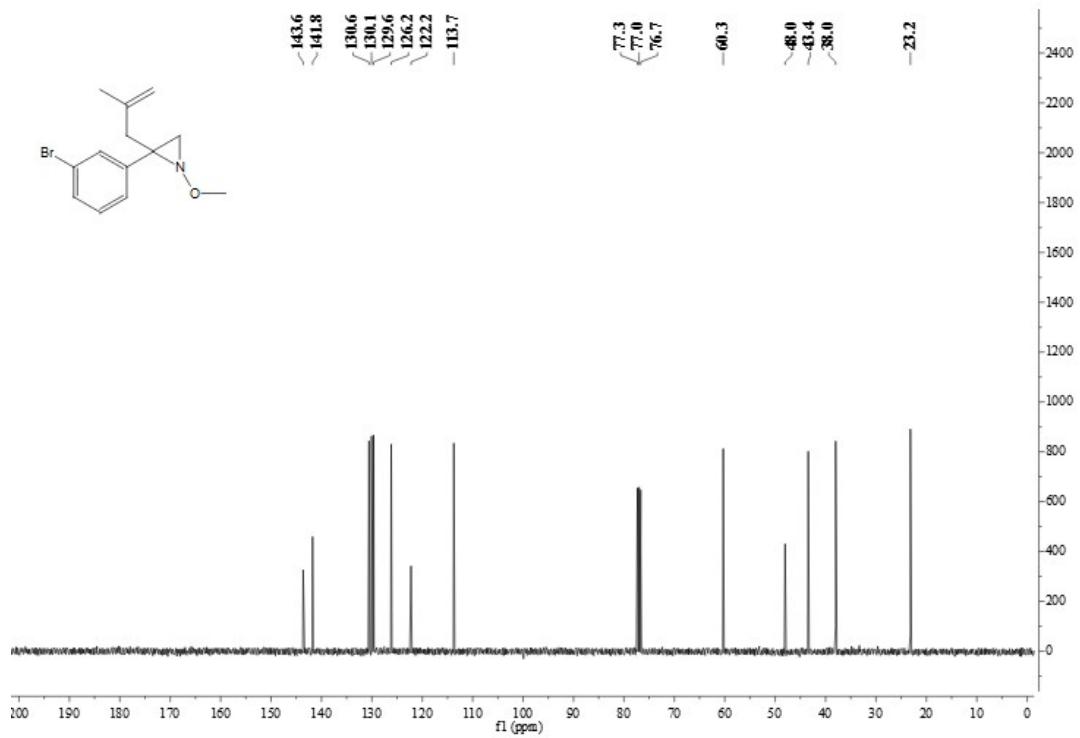

$^1\text{H}$  and  $^{13}\text{C}$  of **3t**

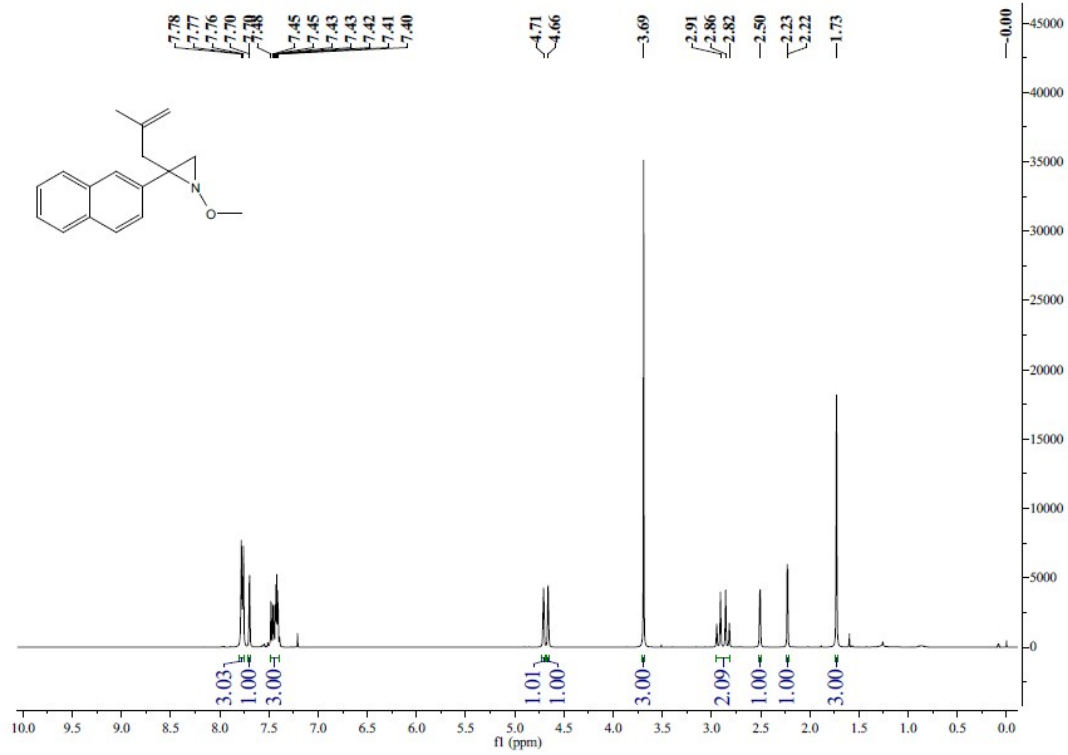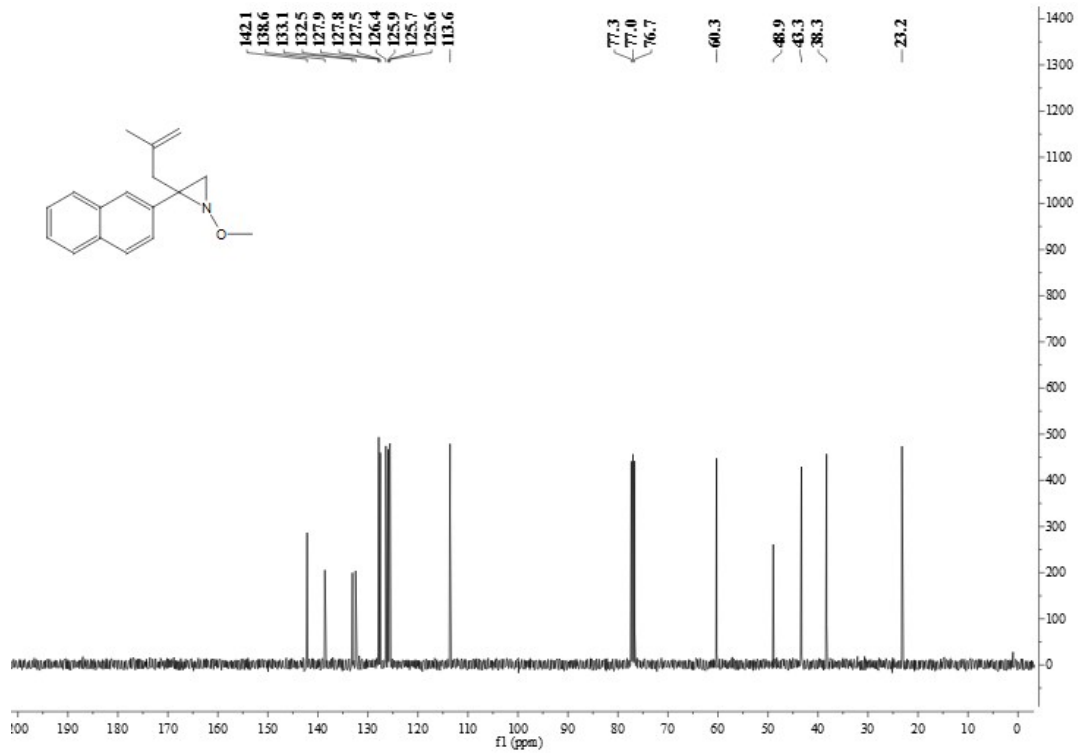

$^1\text{H}$  and  $^{13}\text{C}$  of **3u**

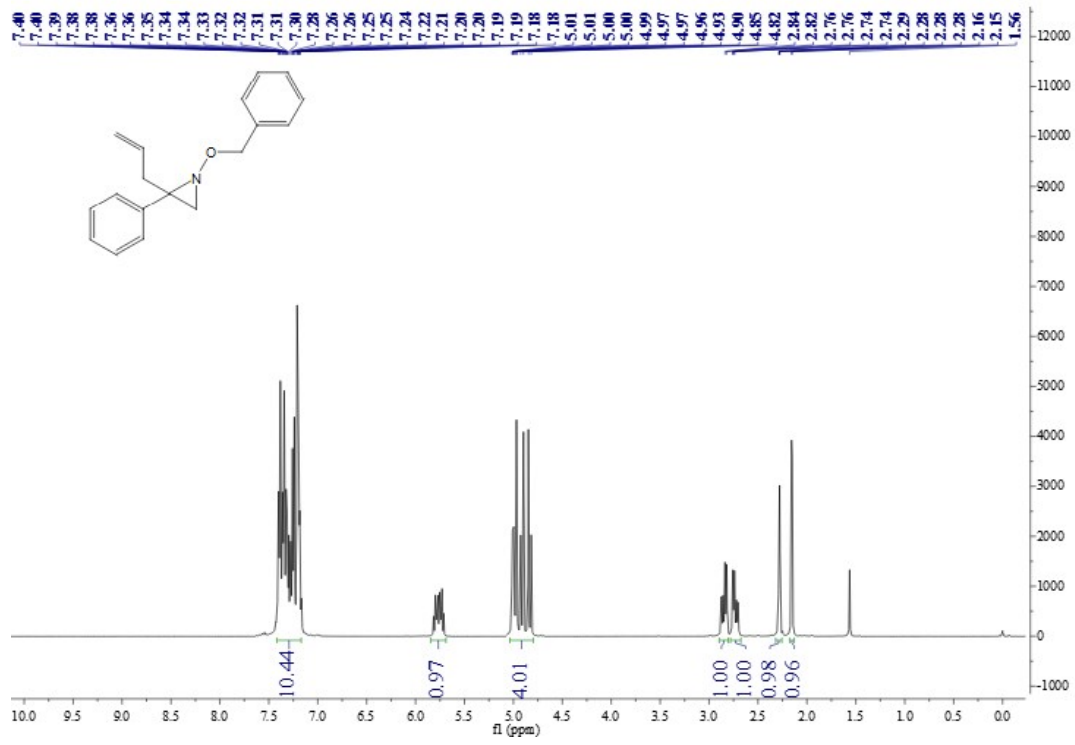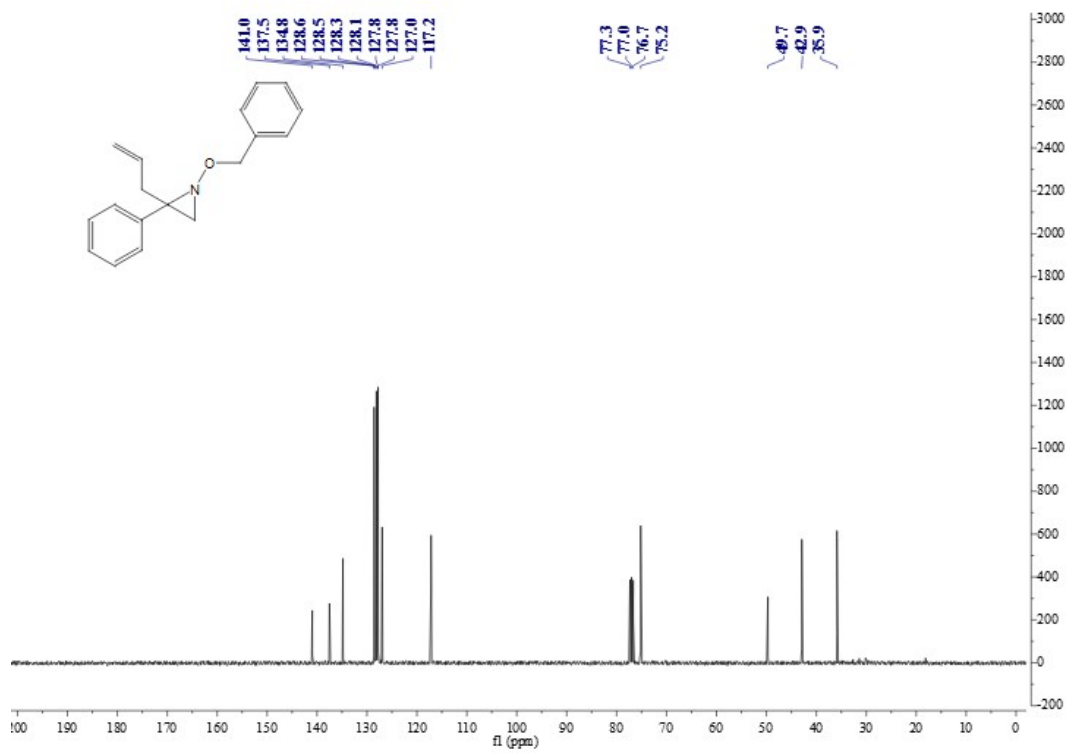

$^1\text{H}$  and  $^{13}\text{C}$  of **3v**

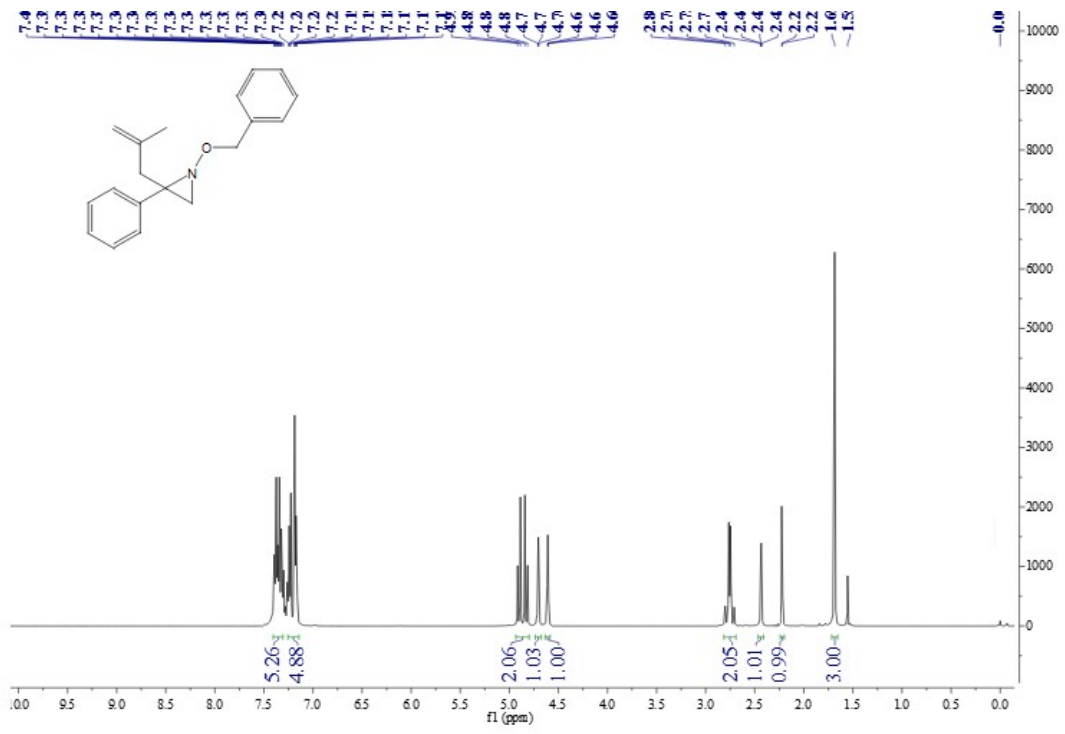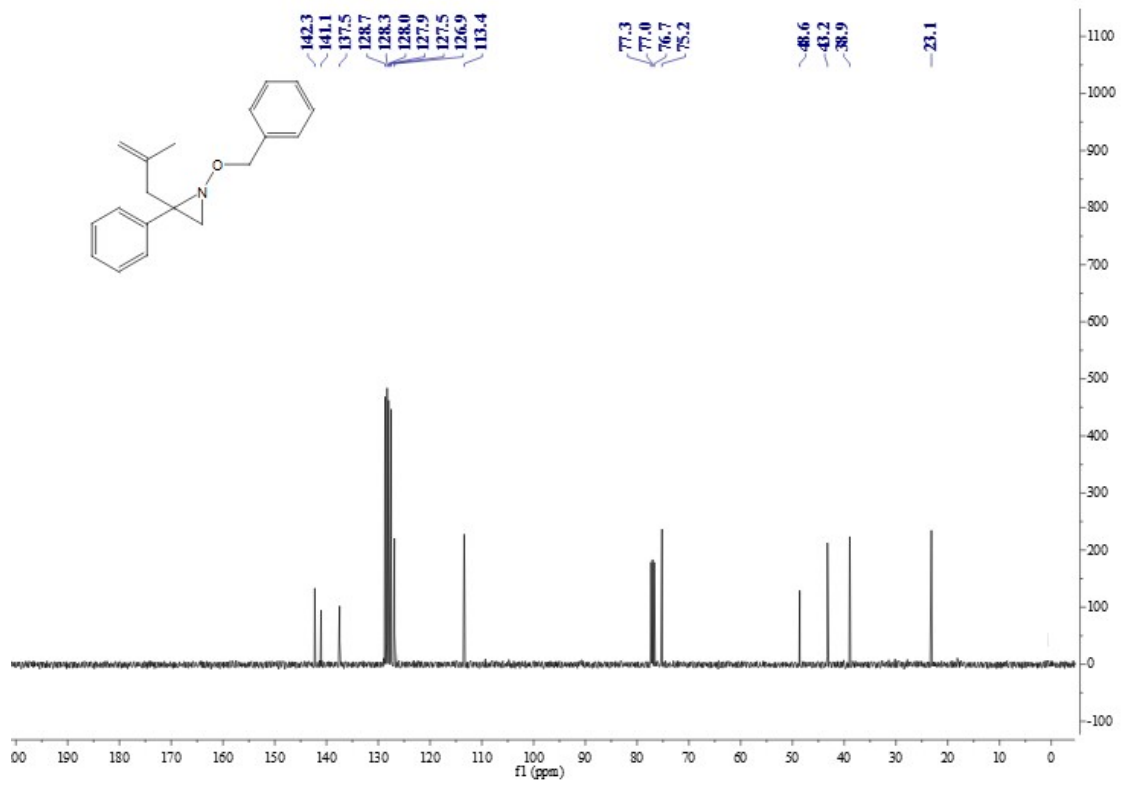

$^1\text{H}$  and  $^{13}\text{C}$  of **3w**

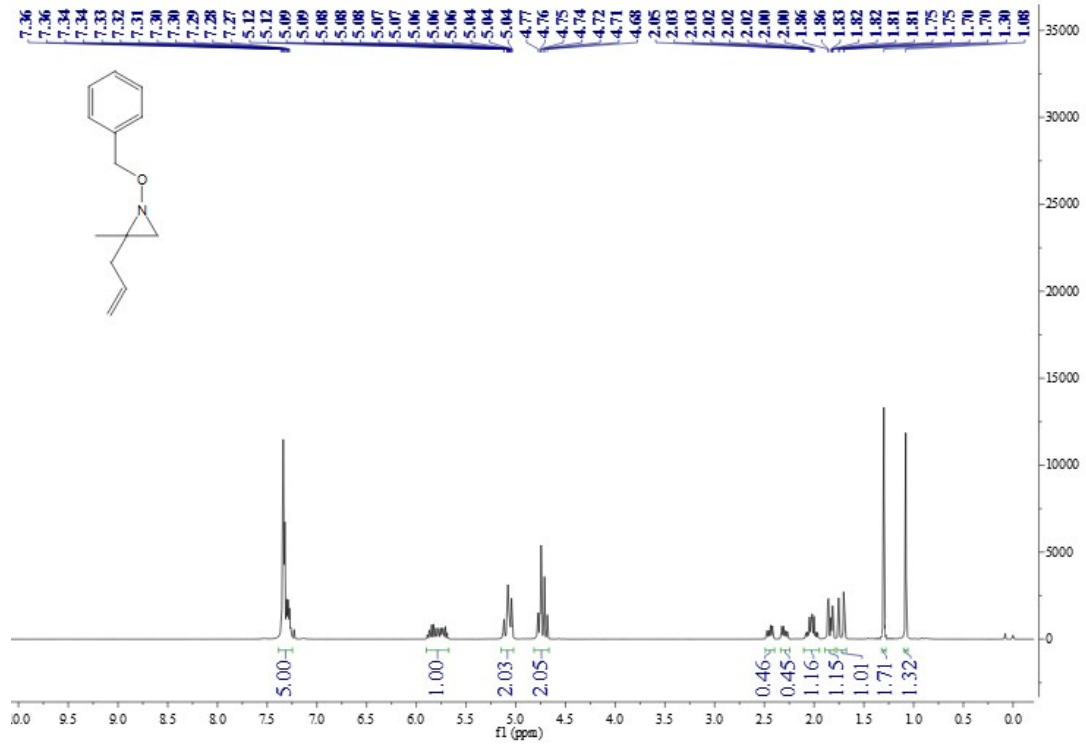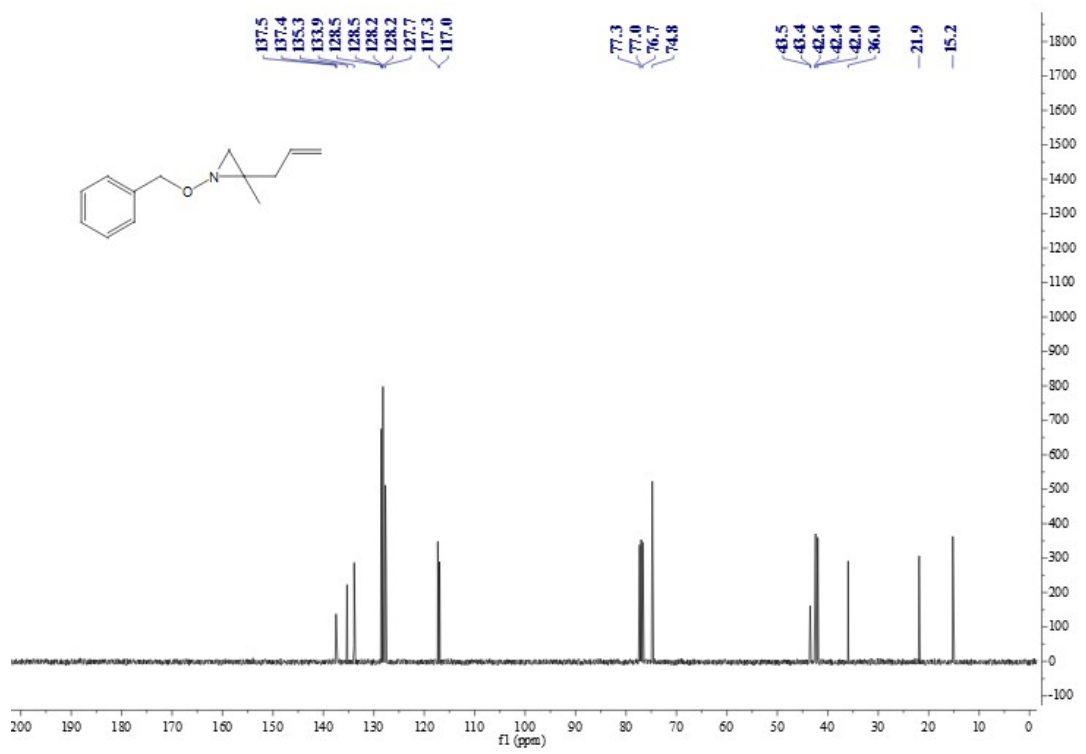

$^1\text{H}$  and  $^{13}\text{C}$  of **3x**

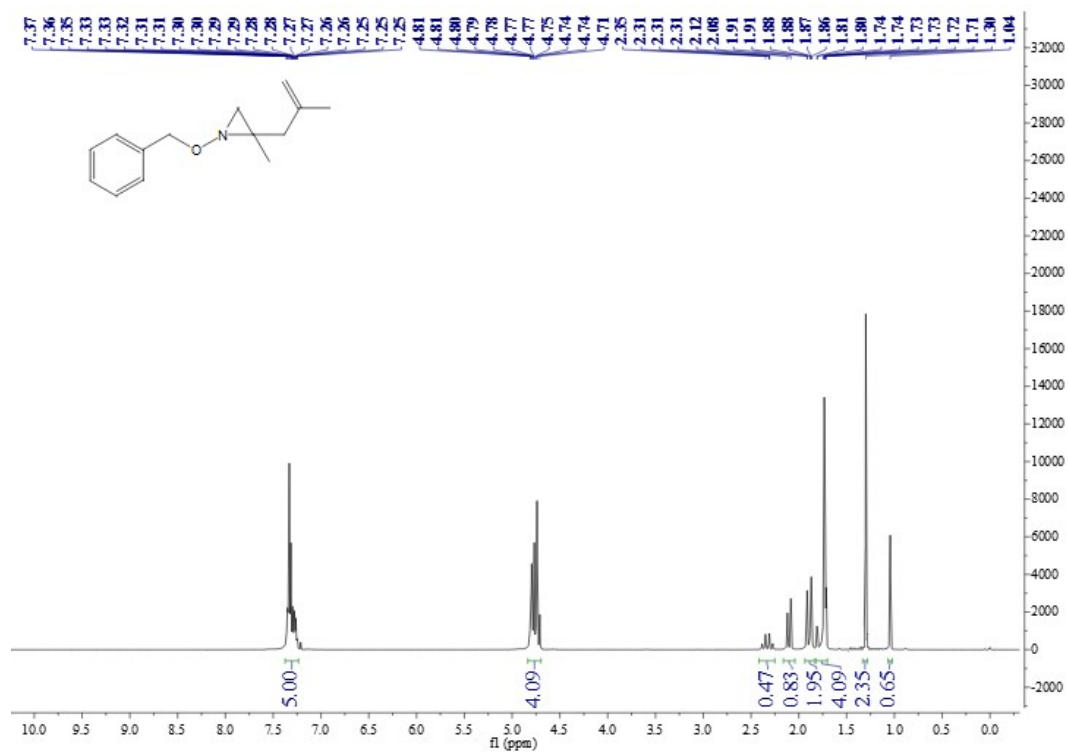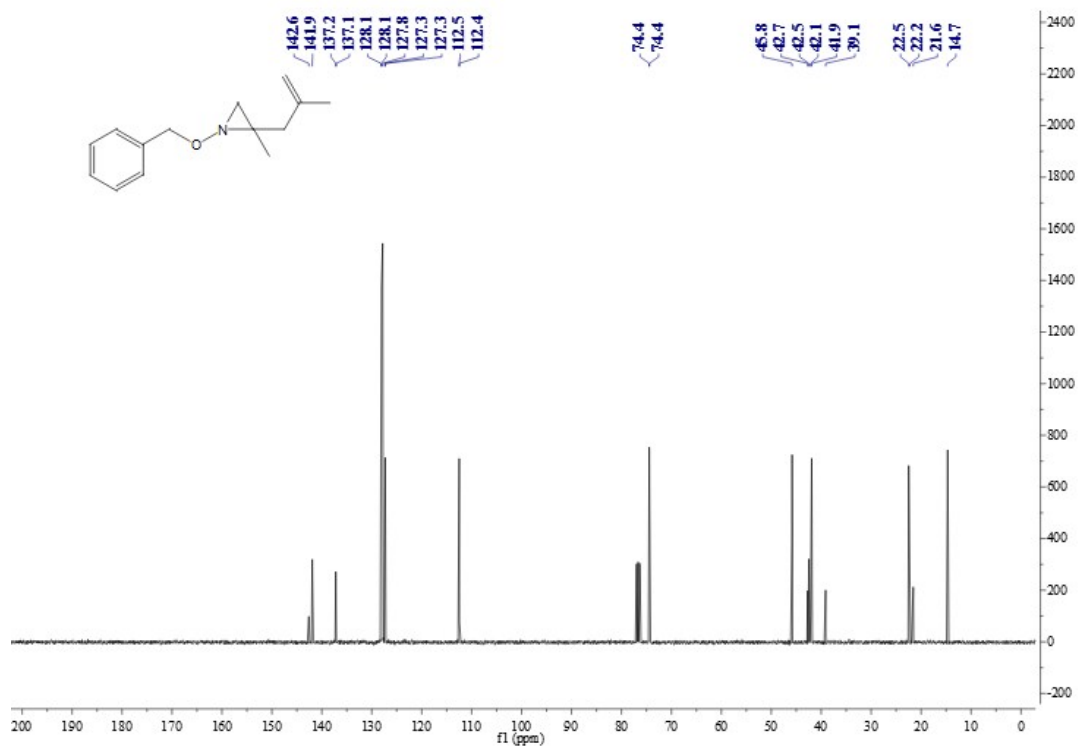



$^1\text{H}$  and  $^{13}\text{C}$  of **3y**

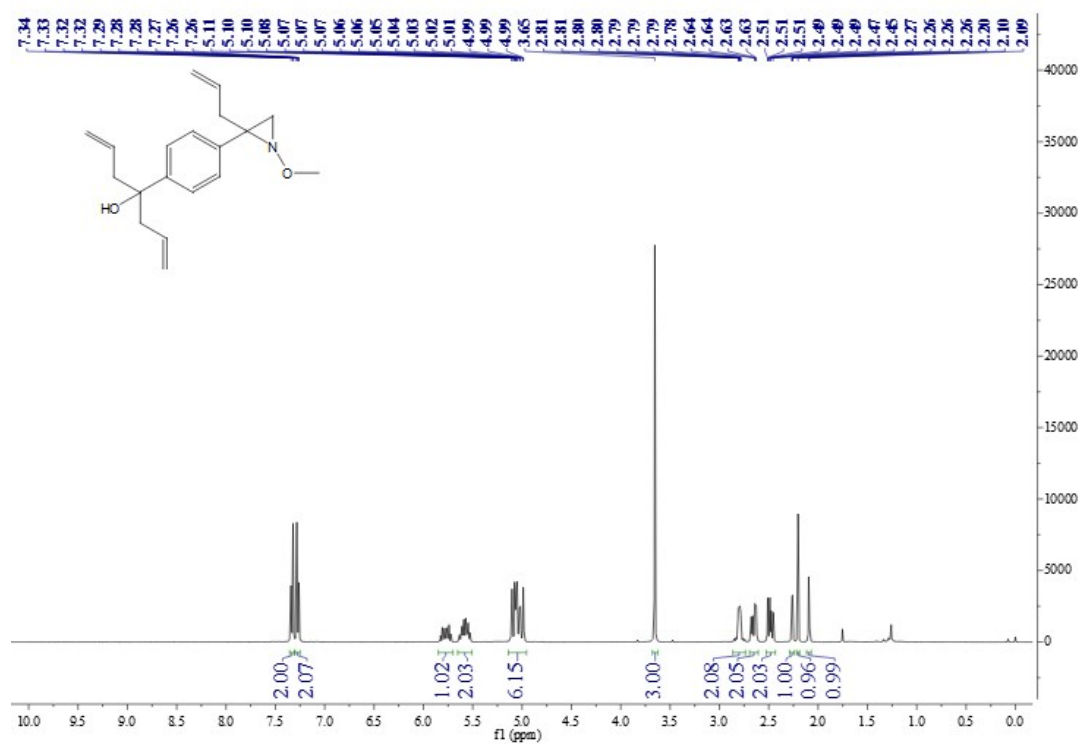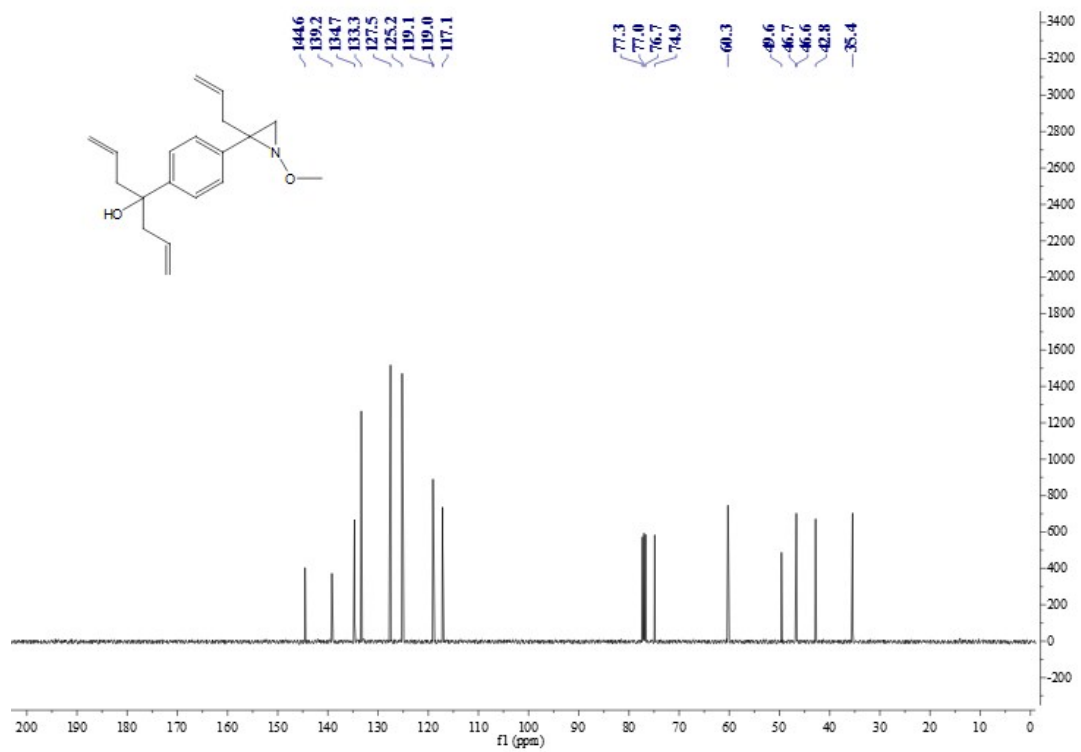

$^1\text{H}$  and  $^{13}\text{C}$  of **3z**

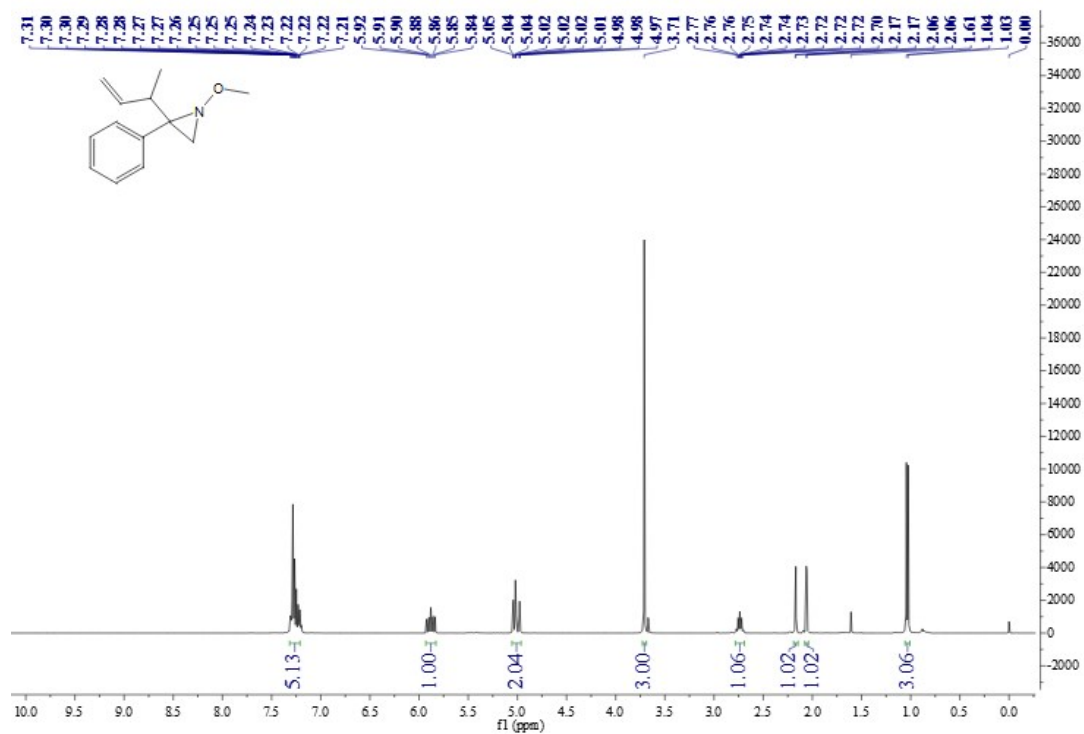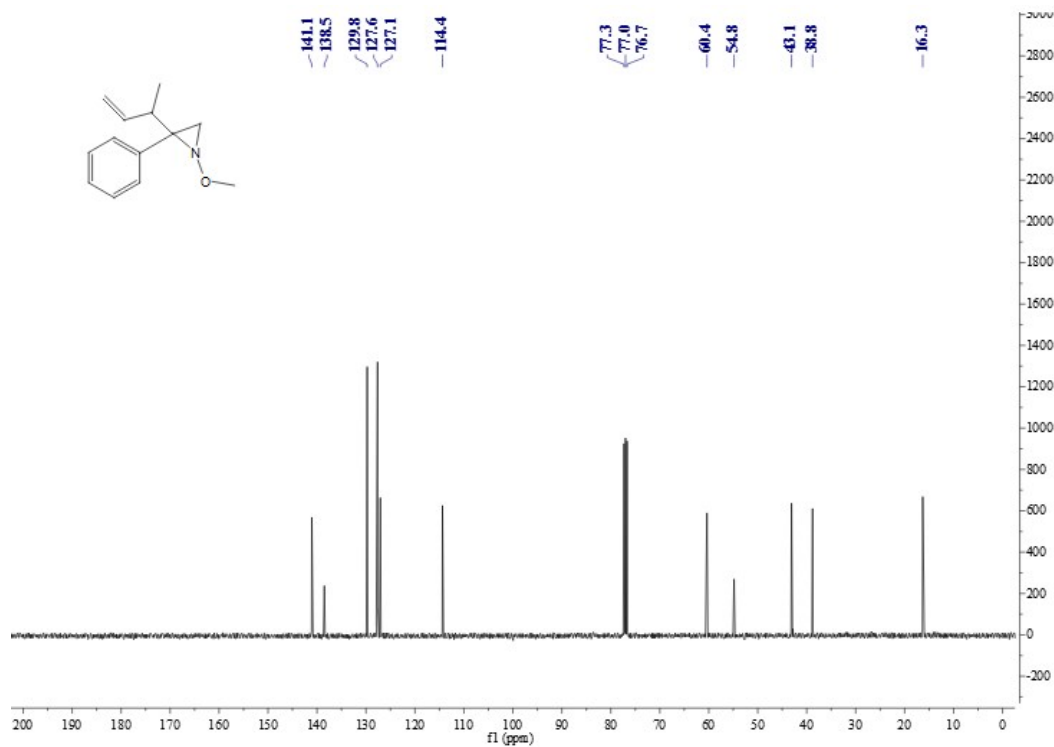

$^1\text{H}$  and  $^{13}\text{C}$  of **4aa**

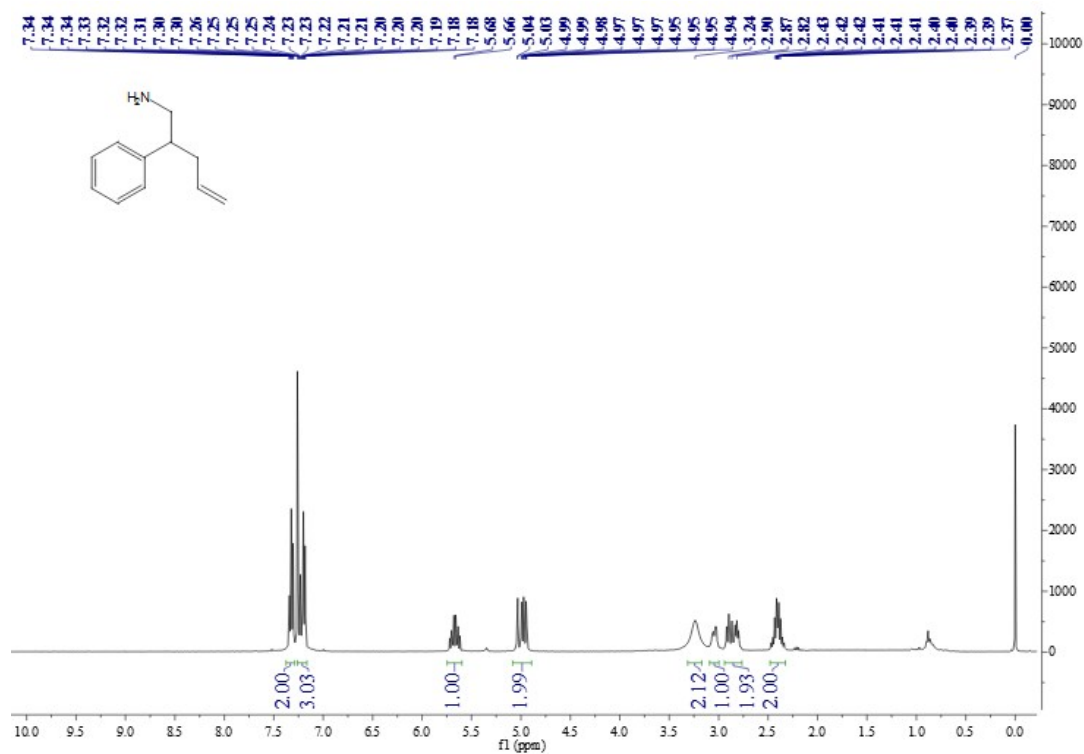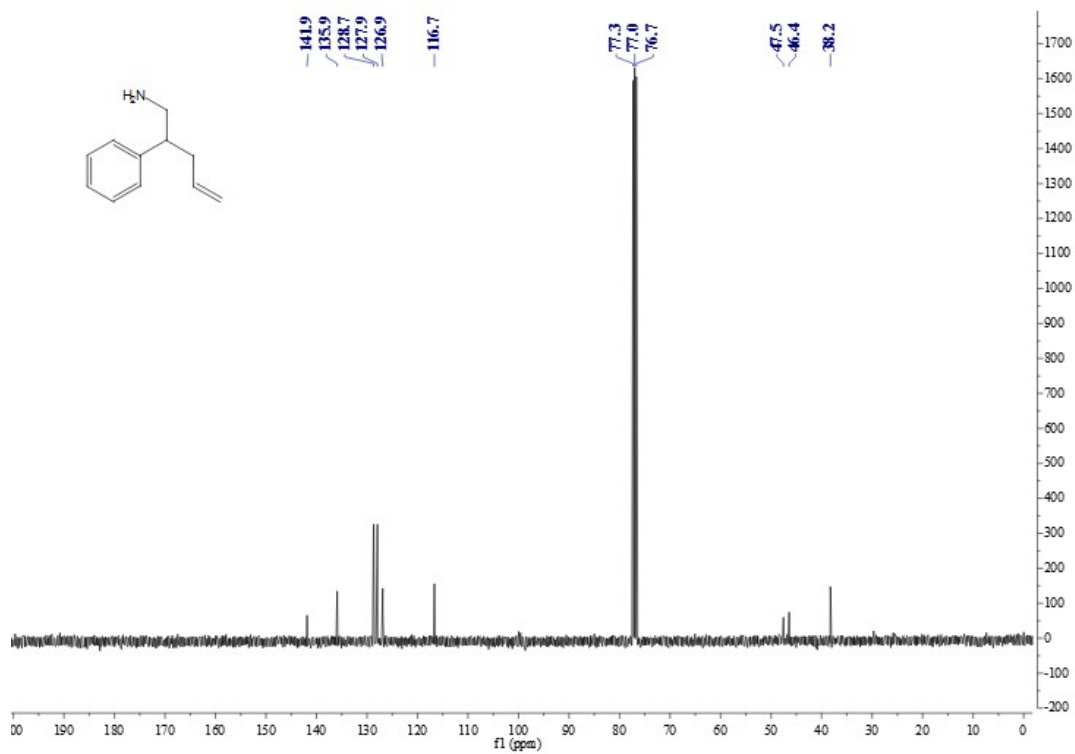

<sup>1</sup>H and <sup>13</sup>C of **4ab**

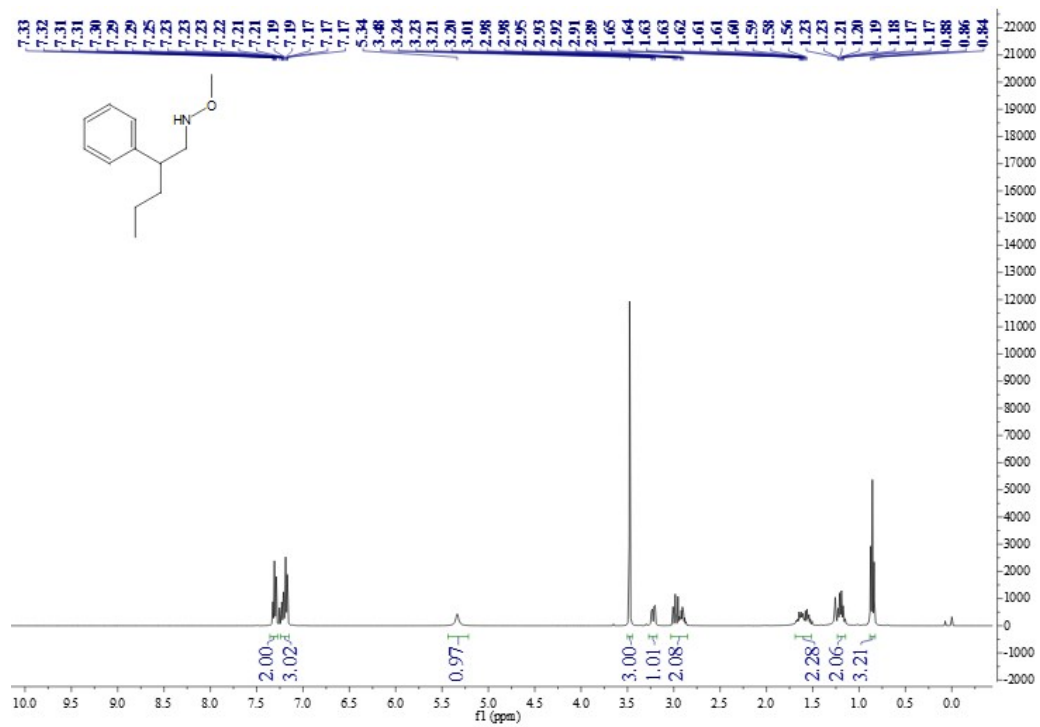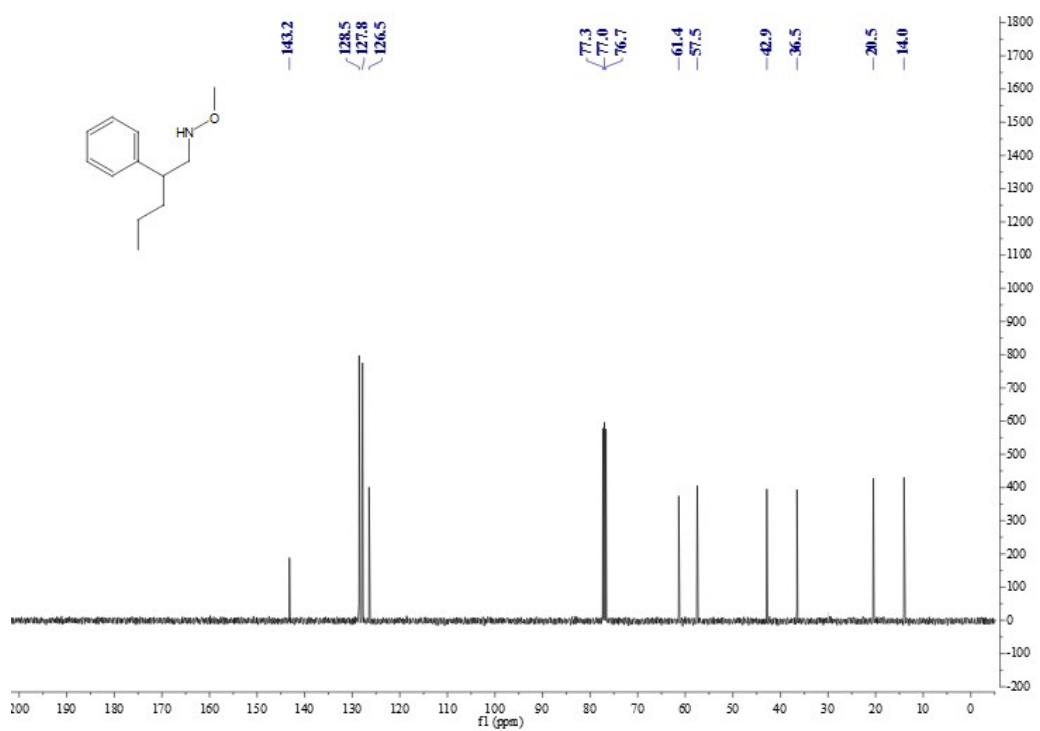

Supplement: c5ra26394h1.pdf [file c5ra26394h1.pdf]
